# Supplementary material for: Candida albicans isolates contain frequent heterozygous structural variants and transposable elements within genes and centromeres
Source: HighWire-hosted journal article supplement (doi:10.1101/gr.279301.124), 2024-10-22
Supplement: Supplemental_Methods_Oggenfuss.docx [file Supplemental_Methods_Oggenfuss.docx]

***Candida albicans* isolates contain frequent heterozygous structural variants and transposable elements within genes and centromeres**

**Authors**

Ursula Oggenfuss1, Robert T. Todd1,2, Natthapon Soisangwan1, Bailey Kemp1, Alison Guyer1, Annette Beach1, Anna Selmecki1,#

1 Department of Microbiology and Immunology, University of Minnesota, Minneapolis, MN, USA

2 Department of Biology, Bard College, Annandale-on-Hudson, New York, NY, USA

**Supplemental Methods**

*High molecular weight gDNA extraction*

High molecular weight gDNA was extracted using the Oxford Nanopore Technologies protocol “High Molecular Weight gDNA Extracted from Yeast” (https://community.nanoporetech.com/extraction_methods/yeast-gdna-ont). Briefly, yeast cells were grown in 150 ml YPD (yeast peptone dextrose) medium overnight at 30°C with shaking. Cells were converted to spheroplasts through zymolyase (1000u/ml) incubation for 1 hour at 30°C. Spheroplasts were concentrated by spinning them down at 2000×g for 5 minutes and removing the supernatant. Spheroplasts were lysed using the following buffer: 0.5 ml of Tris-HCl 1 M, 0.5 ml of EDTA 0.5 M, 0.5 ml of NaCl 5 M, 0.05 g of PVP-40, and 2.875 ml of ultra-pure nuclease-free water. 4 µl of RNase A in a 10% SDS solution was added to the spheroplasts/lysis buffer mixture and incubated at 50°C for 1 hour. After incubation, 10ml TE buffer and 5ml of a 5M potassium acetate solution were added to the lysate followed by gentle inversion. The lysate was pelleted at 500×g for 5 minutes at 4°C, the supernatant was removed, and the pellet was washed 2× with ice-cold 70% ethanol. High molecular weight DNA was then pelleted at 500×g for 5 minutes at 4°C, and the supernatant was discarded. The high molecular weight DNA was resuspended in 1mM pH 8.0 TE overnight at room temperature. Libraries for long read sequencing were prepared using the Oxford Nanopore Technologies ligation sequencing and native barcoding of genomic DNA (with EXP-NBD104, EXP-NBD114, and SQK-LSK109) according to the manufacturer’s instructions (protocol version: GDE_9063_v109_revD_23May2018).

*Genomic landscape of the C. albicans* *reference genome*

Niches in the reference genome were described in detail. Gene annotations and CEN coordinates as marked by Cse4p binding sites were extracted from the C_albicans_SC5314_A21_current_features.gff (<http://www.candidagenome.org/download/gff/C_albicans_SC5314/Assembly21/>). The SC5314 MinION isolate is derived from the same disseminated candidiasis isolate as the *C. albicans* reference genome. Yet, the *C. albicans* reference genome is based on short read data and only represents one of the two haplotypes.Transposable element (TE) consensus sequences were extracted from the literature (Goodwin and Poulter 2000; Goodwin et al. 2001; the sequences are also available in Supplemental Table S1). A novel TE annotation was conducted using RepeatMasker version 4.1.3 with the parameters *-engine ncbi -no_is* (<http://www.repeatmasker.org>), and “Simple Repeats” and “Low complexity” regions were removed. To compare niches along the chromosomes, the reference genome was split into windows of 5,000 bp with the tool splitter from EMBOSS version 6.6.0.0 with parameters *-size 5000 -over=0* (Rice et al. 2000). For each window, the mean GC content was calculated with geecee in EMBOSS. The coverage by genes and TEs respectively for each window were each calculated with BEDTools intersect version 2.30.0 with parameters *-wao* (Quinlan and Hall 2010). Both gene and TE density for each window was calculated. The per base coverage and mean base coverage for each window was calculated with SAMtools depth version 1.14 (Li and Durbin 2009; Li et al. 2009).

*De novo assembly and genome comparison*

To gain a general overview on sequence similarity between the genomes, simple *de novo* assemblies were conducted using Canu version 2.2 and the parameters genomeSize=14.8m -nanopore-raw corMhapSensitivity=normal (Koren et al. 2017). Completeness of the *de novo* genome assemblies was assessed using BUSCO version 5.5.0 and the saccharomycetes_odb10 dataset which includes 2137 genes (Simão et al. 2015; Manni et al. 2021). Assembly statistics for the scaffolds were extracted with QUAST version 5.2.0 (Mikheenko et al. 2018). The *de novo* assemblies were then compared with *C. albicans* reference genome using NUCmer version 4.0.0rc1 and show-coords in MUMmer version 3 (Kurtz et al. 2004). To gain insights into large-scale chromosomal differences between the isolates and the *C. albicans* reference genome, we then generated dotplots, with dotPlotly, using the Rscript mummerCoordsDotPlotly.R and the parameters -m 20000 -q 1000 -k 9 -l -p 7 (<https://github.com/tpoorten/dotPlotly/>).

*Genome-wide structural variant and transposable element calling and genomic landscape*

To detect structural variants (SVs), DELLY version 1.1.6 was run with the parameters *lr -y ont* and used BCFtools version 1.10.2 was used to create a VCF file (Li 2011a; Rausch et al. 2012). SV types are inversions (INV), duplication (DUP), translocations between chromosomes (TRA), deletions (DEL) and insertions (INS) relative to the reference genome. SVs were filtered for “PASS”, and SVs annotated in the mitochondrial genome were removed. Estimated length and zygosity of each SV were extracted from the VCF file, depending on the SV type. DELLY does not provide length or sequence information for translocations between chromosomes. To detect sequence patterns or potential errors, the sequences for all short SVs < 100 bp were extracted and further analyzed. Geecee in EMBOSS was used to calculate the GC content of short SVs. Short SVs were labeled as homopolymers if more than 80% of the sequence was covered with the same nucleotide. Simple Repeats were extracted using RepeatMasker and overlaps with short repeats were detected using BEDTools intersect with the parameters -wao. Short SVs covered by more than 80% of simple repeats or low complexity repeats were labeled as such. We extracted information about sites of replication origins from the ChIP-seq data from Tsai et al (2014), and calculated the number of SV close to replication origins with BEDTools -l 25000 -r 0 for upstream SVs and BEDTools -l 0 -r 25000 for downstream SVs.

To detect presence or absence of reference TE copies in the three long read isolates, all reads overlapping the TE locus in the reference genome were extracted using SAMtools view on the mapped reads. The corresponding TE consensus sequence was then blasted using BLASTN version 2.13.0+ against each read, assuming that in a true presence of the TE, the unmapped part of the read should contain the sequence (Camacho et al. 2009). Hits with an e-value above 0 were removed. If less than 5% of all reads had a hit, the TE was declared as “absent”. If less than 75% of all reads had a hit, the TE was classified as heterozygous, and if more than 75% of all reads had a hit, it was classified as homozygous. Non-reference TEs were then detected in the raw long reads using TELR version 1.0 with the parameters *-k --aligner minimap2 -x ont -t 8* (Han et al. 2022). Only TEs supported by reads in both directions were kept. If the same TE family had a hit on a position with less than 5 bp divergence between the isolates, it was considered to be the same locus. Since no length estimation is given for TEs that are not present in the reference genome, an estimated length corresponding to the TE consensus length was used. TE zygosity in the assumed clonal isolates was estimated based on the allele frequency, with TEs of an allele frequency below 75% being called as heterozygous.

*Sequence comparison of the Tca2 transposable element alleles*

Copies of the *Tca2* TE family that underwent amplification in L26 were analyzed. Only reads mapped to each predicted *Tca2* locus were extracted using SAMtools view. The reads were compared against the 6,426 bp long consensus sequence of *Tca2* using BLASTN with the parameter -outfmt 6. Hits shorter than 6,000 bp were removed to avoid including hits to the 280 bp long LTRs alone. The corresponding reads were extracted from the original raw reads using seqtk subseq (https://github.com/lh3/seqtk). The reads were then aligned to the *Tca2* consensus sequence, using minimap2 and the parameter *-ax map-ont*, followed by read sorting and indexing with SAMtools. A consensus of all mapped reads was created using BCFtools mpileup with the parameter -Ou, BCFtools call with the parameters -Ou -mv -, followed by compression with bgzip and indexing with tabix and parameters -p -f bcf and BCFtools consensus (Li 2011b). Consensus sequences of each *Tca2* locus were compared against each other using BLASTN and the parameter -outfmt 6. Hits shorter than 3,000 bp were excluded, and a similarity matrix was created using ggplot version 3.4.2 in R version 4.3.1 (Wickham, 2016; R Core Team 2023). A multiple sequence alignment was created using the consensus sequences of each *Tca2* locus and the consensus sequence of the TE, using MAFFT version 7.475 and the parameters --reorder --local pair --maxitrate 1000 –leavegappyregion (Katoh et al. 2013). The multiple sequence alignment was visually inspected with Jalview version 2.10.5 and visualized with msavisr in R (Waterhouse et al. 2009; <https://github.com/vragh/seqvisr>). A phylogenetic tree of the multiple sequence alignment was created using RAxML 8.2.12 (Stamatakis, 2014): Initially, 20 maximum likelihood trees each with a different starting were created, and the three with the best likelihood was extracted using the parameters raxmlHPC-PTHREADS-SSE3 -m GTRGAMMA -p 12345 -# 10 --print-identical-sequences. Next, a bootstrap analysis was performed to obtain branch support values, using the parameters raxmlHPC-PTHREADS-SSE3 -m GTRGAMMA -p 12345 -b 12345 -# 50 --print-identical-sequences. Finally, bipartitions were added on the best maximum likelihood tree with parameters raxmlHPC-PTHREADS-SSE3 -m GTRGAMMA -p 12345 -f b -n. The bipartitionsBranchLabels tree was visualized in R using treeio version 1.23.1 and ggtree version 3.6.2, after being rooted with the original consensus sequence of *Tca2* (Yu et al. 2017, 2018, 2020; Wang et al. 2020).

*PCR screen for centromeric structural variants*

To validate the presence of structural variants, PCR was performed on SC5314, L26, P75063, and an additional 100 *C. albicans* clinical isolates from diverse patients, body sites, and geographic regions (Supplemental Table S2). Isolates were cultured shaking overnight in 3ml YPD at 30C. DNA extractions were performed using phenol:chloroform:isoamyl alcohol followed by minimal disruption with a Bead Ruptor (Thermo Fisher Bead Mill 24 Homogenizer), as previously described (Selmecki et al. 2006). DNA quality and quantity were analyzed with both NanoDrop and Qubit (Life Technologies). All PCRs were performed using Gen Script Taq polymerase and 1µl of 50 ng/µl high-quality gDNA (https://www.genscript.com/enzyme/E00007-Taq_DNA_Polymerase.html). PCR primers and parameters can be found in Supplemental Table S3.
