# Supplementary material for: Candida albicans isolates contain frequent heterozygous structural variants and transposable elements within genes and centromeres
Source: HighWire-hosted journal article supplement (doi:10.1101/gr.279301.124), 2024-10-22
Supplement: Supplemental_Table_S1.xlsx [file Supplemental_Table_S1.xlsx]

## Sheet: Sheet1
Supplementary Table S1: TE fasta consensus sequences from the literature
>alpha #solo-LTR_of_Tca1;Retrotransposon;Ty1
TGTTCGCTATAGAGAGATTTCCTAGCCGGAATGCACGACAATCCTGAGACGGAAGTCGATCGTCGATGCCCATGGTGCGTGGTGAAAAATTTTCTTAGAAAATTTGTTCTTTCCTTCAACTGCTTTTAAGAAAGGGAGGTTCAAGTGGTTTAAGTACGACGGTCACAAAGATTGCGGCTTATGAGGCCCGAACTGAGTTGAAATACAAAATCAAGATATAATTATATACCTTACTTGTCTATATTGTTTTATAATACATTCTTCAGATATTTAAATTTCTGTGTATCATCCTATAAAACAGAGATACATTCAGTACATTTAGTATACTGAGTGAACTGGTACCTGTGACATTCAAGATAACTGTTTCGCGCACGCTGGCAGACGAACA
>beta #solo-LTR_of_Tca8;Retrotransposon;Ty3
TGTTGTATAATCAGCCTTGCTCGTTGTCTGATTTACAATTCTTGGTTCTATTGGTTGTTTATTACCTTGGTGGTTGCGCACCATCTTGGCATTGAGTTATTTATATTTCTATTTTCGGTATTTTGTTTACACCTCGTTAGACGAGTTATTGATATTATTAAATTAGTTGGTTATTGACTGGTCTGATGGTTCATCGTCACTCTAGTTTTCGGTCTATATAAGGGTCAGAGATTCTCCTTTGTCTTCTTATATATTTTATATTTTTATATTCTTTTCTTCAGTTAGTTTTCATACAGAATCAGAGTCAGAATAGAAGTTATTGTTTTCCCAGTTCTTCATATTAGTGTTTACATCTACAGCTGTTCTATAGGTCCTGCAAGTCGAAATATACATTA
>chi #solo-LTR_of_Tca10;Retrotransposon;Unclassified
TGTAAGGTAATACGTACTATAACAATCCCTATCCAGTGGGCACTACTCTTCCGTAATCGGACTATCGCCACGCCACTGAGACTCGGGTATAAATACCCTCCCTTGACGCCCTTGTCATCAACTACTTCTATAGGCTTTCTATATACTACACTAGAGCAAATACACGCTATTCAGCATTGCCTAACTATCACA
>Cirt1 #Full_length;DNA_Transposon;Fot1
CCTCACGCCCGGTGGAAAATTCTCTCCTGGGAAACTTACGCGCAAAAATAAAAAAATGTAAACAATCCTTTGACCACACTCTTCTCCTATTCCTCTTCAATGTGCCACCTTACATGCCAAAAACAAAAGAAGTAAAGCAAGAAGTTGATGAAACTGCCATTCAAAATGCTATCCAAGATTTTAAAAGTGGGAAATTTAAAACAATTGCCGAAACAGCTCGGTTTCATGGTCTTGTTCCTAACACATTGAGGTTTCGTTATAATGGAGGATTACCAAGGAAATTAGCCCACACAAAAGAGCAACTCCTTTCTCCTGAGCAAGAAGATGAAATAGTTAACTGGATTGTTGATTCAGATGCAGATGCAGATGGACATGGACGGAGTCGTAGTGACATAATCG…
>Cirt2 #Full_length;DNA_Transposon;Fot1
CCTCACGTGTCGGAATTTGTTGACACCCCACGACTTTGGCAAAAAAAATAAAAAATTGTAAACAAACAAATAACCAATACTCTTTCCATTTTGTTTCAATAATACTTCAATATGGCAATTAAACGGAAAAAAAAAGCAAGTGGTCGATGAAGTGGCTATGGCAAAAGCCATAAGTGATATAAAAAATGGATTATTGTTGTCTTATAGAAAAGCAGCAAAGAAATATAACCTTTGTCATGAAACCATAAGGAAACGTATGAATGGAGTACTACCCAAACAAATAGCCCATAGAGGGAAACAACTCTTCACCCCTCAACAAGAGAAGGAGATAGTCAAATGGATTATTGAGTCTGATGAAGCAGGAAATGGACGTAGCCGTCATGATATCGTTGAATATGC…
>Cmut1 #Full_length;DNA_Transposon;Mutator
GATGGGGGCTATTTTTACAACAAAGTGACGTGAAAAGGTCAATAGCCACGACTTGCAGACTCTTATGCGCAATTATGCAAGTTGTTGCCTTTTGTTTACATTTTTTGTCGACCTAAGCAACATTCATCCCTTGCCCGCCCCCCTATTTTCACCACCATAAATGCCACGCTGGCGTGACCTCAAAAATTTTACTATCCCTATCACTTTCTTTTCCTTCTTTTTTCACCATTCGTTCATCAATCCATTAGTTTTCATCATAGATCGACTGAATAAGTGCTACTACTTCGACTACTGATCCTTTAAGTTATGGCAAGTATGAATAATACAACTTTTTTGAAGAATTTTGTTTACTAACTAAGTATTATAGAAAAGTCAGAGATTATTGTTCATGATTGTATC…
>episemon #solo-LTR_of_Unknown;Retrotransposon;Unclassified
TGTCACAATGTAGCGCTATTTAATTTAAATGACTATGATATGTACGGTACTGATTCACGTGCAATGTGAATACTCACGCAGTTTCTGGTGGTTGGCTAATAAATGTAAATAAACTCTATTGGTTGTATGTGTAATAATGGACACAGTGACTGAGTGTAAGCCTTCGGGTAACCTCTATTTCGTTCGAGTGTAAAAGTATGTGGATTGTATGTATTTGTATATTCCCGGATCTCAGCCTAAGCTTGCATGAGGTCCATTCAAACTAAATAACTAATTTTCTAGATTTTCTCTACTTAAATAGTATTCAACTTATTCGAGCGTGCGTAAACCAATTATTCGCTTTACTCACACACTCACACTTAAATCCTTTTAACTAATTCAACACATTCTTCACTAATT…
>epsilon #solo-LTR_of_Unknown;Retrotransposon;Unclassified
TGTCACACAGTCAGATCAACATACAAGGAATATCGCTCAGACAGACTGAATGTGACAGTTAAATAATATAACAACTTAACTTTAACCTATATTATTTACGACATAATTAACTAAGTACACAAAATGGACAAAAGGAAATCAACACAAGTGAAATCGGAAACAATGTTTACACAACTGATCTATTTCCAGATTTCTTGAGAGATTGACAATATAAATAGTAGACAGAAGTAATTTATATTTTATATTATATACTTGTTAGATAGGCTTAATTAATGGAAAGAAAGTAGAGTTAACTTAAAGAGGTTTTACAAGAGAAATCAGGGAATCAAAAGTGAAAAATCAACTAAAGGTTGAAGTAGCTCATATCTGAGCAATAGAGTGTATTCTTGAGATAAGGAA…
>eta #solo-LTR_of_Tca11;Retrotransposon;Unclassified
TGTTGTATAATCAGCCTTGCTCGTTGTCTGATTTACAATTCTTGGTTCTATTGGTTGTTTATTACCTTGGTGGTTGCGCACCATCTTGGCATTGAGTTATTTATATTTCTATTTTCGGTATTTTGTTTACACCTCGTTAGACGAGTTATTGATATTATTAAATTAGTTGGTTATTGACTGGTCTGATGGTTCATCGTCACTCTAGTTTTCGGTCTATATAAGGGTCAGAGATTCTCCTTTGTCTTCTTATATATTTTATATTTTTATATTCTTTTCTTCAGTTAGTTTTCATACAGAATCAGAGTCAGAATAGAAGTTATTGTTTTCCCAGTTCTTCATATTAGTGTTTACATCTACAGCTGTTCTATAGGTCCTGCAAGTCGAAATATACATTA
>gamma #solo-LTR_of_Tca2;Retrotransposon;Ty1
TGTTGGTTTGTGCACTATTTTGTGTCAGAAACTGATCAATGAAAATGATGGTTATTATGAGAATGGAAAATTTTTCCATCACACATCAGGTGATGACAGAACTAAACTATATTGTGTAGTATAAATAAGGGTATGAAATACCAACATCCCAGAATATCAACGAGATAGAAGGGAGGAGTTTCAATATATATCTTGTGAATAATAACTTCGTTCTAATTCACTATACACAACTAGACGTGTACACGCTCAATCTCAGGTAAAGAAAGTTTATATTCCATCA
>huia #solo-LTR_of_Tca16;Retrotransposon;Ty3
TGTTAGGTAGTAGAGTCACTTGACACTATTCTGAAGCATCTTTTAAACTCTAATTCCTCTATAAATAGTTTAGAATTCCTCTTTTATATTTAAGTAAAAAAATAGACATTAACGATCAAATCTTACA
>iota #solo-LTR_of_Unknown;Retrotransposon;Unclassified
TGTTGTAAAACAGGATCTACAATATTTTATGTGCAGTCCTTCAGAATTCAATTCAGAGAGTTCAACAAATCCTTTATCATTGCTATTTTATTATTCTCTATTATATATTACTACTTCTCTTAGAATAACTATTCATACTTTTATTACTTACAATTATTATACACTGATAATTAGCTTCGAATCTATAGAAAGTTAGAGCAAGACATATTATCTGTCGTAATATCTAATTAATAAAACCTAGGAATACTTCA
>kahu #solo-LTR_of_Tca15;Retrotransposon;Ty1
TGTTGATATGGTAATGTTCAGTTCGTAAGAACACGACAAATGGAAGTTGCCAGAAAGATCTAGATGAATAAAGTGGTAGTGCAGAAATGCACAAAATATGAATTACTGTTAACAAATGACTGCGTTAAGCTACTGTAAAGTCATTTTACTGTGAAAGTCCAAAGTGTCCATATGAAAGTCACATATGTGGTAGAATATGCTAGAAGAATCATATACTGGGGAATGATCAAGAGTGGCTGTGTTTCACGGTTATACTCGAGTATATTTGCCACCGATGACTTTATATGGTGTAAATCTCACTGACTATAAACGTACAACCTAGTTGTAAATGTACTGTATTAAAGTTTACTAACCGACTATATATAGAGGGCCTACTTCCTTGAAGTTGGCATTAGTTTA…
>kappa #solo-LTR_of_Tca6;Retrotransposon;Ty1
TGTTGGTTTATGCGACGTTTGTGTCAGGGAAATAACACCTTGATATAAGTCGTGCGTATTAGGTCAACATTGGTGAAAAATTTGCACTCATCGAGAGCCAGGAATTAGTATAAAAAGAAGAGAAAAGAAAGATATTTAGGATATTTATTATATAGGGACCGAGTTTCAGGAGACACTTTTAGTGGGCGTAAACTTCATTCACTCTGTTTTTTGCTTATTACAAATTATCACCTATCGTGTACTAGGACTAATTCTCACGAATATTCCGTGTATACAAACA
>kereru #solo-LTR_of_Unknown;Retrotransposon;Unclassified
TGAACAGACACACCTGGACTGCGTTAGGTGGTGCAACGCTCAAACCTTACCCACATACAATAGAAATGATGATATTGGACTACTAGGTGCAATGAACAAAGCCAAACAGGCTCAGAAGAGTGGTTAAGGAGATAATAGACGATGTAACATGGATGTAAAGGTAACAGACTATATCACATGGTCGAATGTAACCAGGAATTAAGCTATTAGGCTTTTTCCCAATCATATATATCCTTGGCAGAAATGATAGGAGCAAGACGCTAAGGCGTGCGGGATTTTACCCGTGTAGTACTCTGAAGGAGTAGTATATAAGTATATAGATTCTCCCAGTGTTTAAGTTAGATATAGAGGGCGGACGAGGCAGAATTAACCTATAACACAATTATATTAGTGACTCAA…
>koppa #solo-LTR_of_Unknown;Retrotransposon;Unclassified
TGTCATAGGCCTGACAGGGCATAAGTCCTTTAGGCATGTGTATTTGGGGAAAAAGCGGATAGTCGTATGAAGAGTAAAAGTATAGAACTACGTAAGTAGAGGTGGCGAGCACCCATATTTATAGTATGGTAAGGTGGATGTGCGAGCACGTCATCGCAATAGTAGTGTGTTAACCGAGAATGGTATAATTAGTAACATTCCTATGACA
>lambda #solo-LTR_of_Tca14;Retrotransposon;Ty1
TGTTGTGATAAATATGTTGTGATGAATAATGTAAGACTACATTGCACTGTGGAAATATAATACAGAGATGAGATATAATACACCTGTATAAAGTGAGGAATTAATCTAAATGTGTTATAATAATAATACGCCAAGATTAATGTGAATAGAGTGTGTATACCAAGATTTACTAACATGTGTGTTTATCCTCGGGTACTTGACCTTTAAGACCGAGAATAATTAGAATGTGCCGAGTGTGTTAGAAAGAGGAAGGCGGACTATAAATATGCGAGAATCCCCTTTAGAGACTAGCCACTAATAAAAAAGATGAACTTGCTCAACTTAAGCAACTAATCAACTAACTGACTAAATTAATATACTCAGTATAGAATATCACCTTAATATTCTATACAATACTTT…
>moa #solo-LTR_of_Tca13;Retrotransposon;Unclassified
TGTCGTGGAGTACGACGTTATCAGGTAAATGATGCTGATTTGATAACTCGTGCACGACATGGACTAGAATTACACTTAATTCGCATAGTACGAGAGAAGTGAGAAGTGTAATTTAGTGTTGTTACCGTTCGGTAATTGATATTGTTTAAGTGAGCCAATGAGAACGCTTTACACTATTGGTTCACACACGCTGAATTGTTAGTGAAATTATATAAATGAAGGAAATTCAACAAATAGAATAAATAGTTCCTTTTCACCTCATGCGACGTGAGAGTGAATTAGGGAATACAAGAATATAAGAGCTTACCATATTAAATAACCTTAAACGAAGTTTACTACATTCTAGGCGTTTCACTTAAGAGATTAGTATCGTGATCTGTTTACATCAATTGCATTGCA…
>mu #solo-LTR_of_Unknown;Retrotransposon;Unclassified
TGTTGGAAATATTATCTGATCAATCCTGCATCTTGAATGTGAGTGCTTTCAGGAATATGAAACCTTATATTTGAGATATGTTCAATGACTATTCAATGTTACAAAGAAACCTTATTATACACAGAAGTGTGTCAAGGTTTAATGTAACATGAGTAATGTAACAATAACACCATGGGTGTGGTATATCGAAAGACCAAGAAGTATGTTACGCTTATAAGGATAAGCGGGGAACCTACACTTTCGAGTGTGTAATGCAACTTCAAGAATTATGTCACTTACACTTTTGAGTGTGTACTACAACTAAATGTAACAAGAATGAAAGTGATATATCTTATACACGCAGAGTGTGAATGTTACTGAGTTTATCTCAGGTGGGGTTTCATCTGCACTGAGAAATGT…
>nu #solo-LTR_of_Tca3;Retrotransposon;Ty3
TGAATATCCTGCATATTTCCTCATAGATTACACTTTTTCTAGGATGTATTCATATTTGCAAACTATGCTTGTTCAGAATTGGTTGCGAAGTTATCAGCTCAATTTTTTACTCTATAAACATCACGTTTCTCTCCGAATTTTTATATTGATCTTTCATTTTGAACAACCAATACTTTTTTCATCATCAATATATATTTCATCTATTAATGGATTGTCTTTCTAATATATCAAAGCACGACACATTTACTTGCCAAAAAGGATATAAGAAGGAACCTCA
>omega #solo-LTR_of_Tca5;Retrotransposon;Ty1
TGTTGGAAAAATGAAATATGATCAATCCTGCATCTAGAACCTGTGGCAGAATGAAACCTACGAGATTATGAATGACTTGTGAATACAAGTTGAATGTTACAGAATGTTACCAAGAAGGTTACACTTGAATATATGAATGACTAGAAAGTGAATTGAATGTTACAGAACCTGAATAACAATGTTACACGAATGTGTGAATGATATGAGTTTATCTATAGTAATGTGACATATACACAAAGGTGTGAATGACCGAGAAAACAGATGTTACATTACGGGCACTGGAGAGTGCAAGTCTAAAGAATCTTGGAGTAGAAATAAGTAATATAAAAAGGACCAAAGATTCTTTAGAGAAAAGTAAATGAAACTATATTAGATTTTATATAACTAACTAACAAATAA…
>omicron #solo-LTR_of_Unknown;Retrotransposon;Unclassified
TGTTTTATTGGTACCGTGAGGTAAATTGGCTATTATAAGAAAGTTGAAGTTCCTTTAGAAATCTAATCTTCTAACCTCGAATAATGATAATAATATAAATTAATATGTATTAATTTTATACTATAGTGTAGTTTTATGAATAAAATAGTTGATATCTATAAAAGAAAACTATATAAAATAAAGAGGATTGTTGGACATTTAAATATGTCTAATAAAATAATAATTGCAGATCTTTTAGTCTTATGCTTGCTAATTCTCAGATAAAACA
>phi #solo-LTR_of_Unknown;Retrotransposon;Unclassified
TGTAAGGTAGTATAGACAACCACAACCCTATACAGGGCTCTCTTAATCTTTCCTCCAATGTCTGTCTACTGAGTACCATCATACCACCAGGGTAAGGTATATATACTCTACTGGACGCCCTTGTCGTCTATTCCTAAATAGTTTTATATACTCAACTAGAAAATACAAGCTATTAACGTAGCCTAACTATTACA
>pi #solo-LTR_of_Unknown;Retrotransposon;Unclassified
TGTTGTTCGGTCGGATCCTCTGAATTTCTTTCGCAGACAAGACAGATTATCTTTAGAACGTAATATAGTATTCAGTTTGAAATAGCTGGTCTATTCTGAGCACAAACTAAATAGCAATATCAATTAAATATAAAATATGTTATATTCAGGTATAAAATTGTTGATCGTTAAAAAGAAAGATATATAAAATTATATAAAAGTATTCTTGAATAAGCTTCTTTATAAATAATAAATGGTCGTGTAAAATAAACCAAAAATATAGAAATGTTACGAAACAACA
>psi #solo-LTR_of_Tca9;Retrotransposon;Unclassified
TGTTGTATAGTCGTGGCATTCGACTCAAATAAAGAACAGATTGCATTACCAATTTAATTTAAAGTAGTTGGTCCATTAAGCTAACACCTTAGCGTAAATTAGTAATGTCTGACTTAAATGATGATATAGCCCGTTCTAAATCTGTGTAGGCAATGGTGCTTGATGAATTTGATTTAAGTATGTGACATAGTGAATTTGTAGTATCTTTTAGATTTGGACCATAGGCTTTAAATGTAATCTCTACGGTTAAATCTTATAGAACAGAATAAACGTTTAATTTCCCATAATTAAAATATATAACTATATAAAATATTTGACATTTCTTATTCCTTTTATACCAAACTCATGTTTCACAGCCTTCCGGCATATGTTTCCATTCTTGGACATACAGTTCAAGTG…
>rho #solo-LTR_of_Unknown;Retrotransposon;Unclassified
TGTTTTATTTTACTTTTCTGTCAAATTTGCACTACTTTTAATTTGTGTGCAAATATTCTATTTTACTTGATTTTTATATACTTTTATTTTACAATACTTTTTTATAGGACTTTTTATATCTTTTCTTTATCAACTCATCTTTTATACAATATATTCTTACGATTATAACTTTCAATTAAGAAATACAACTTTTTATTAGCATTCTCCTACAAGTTCTTAAGTTCCTAGGAAATTCTTCGAAACTATAATTAAAGACGAAAAGTGTAAAACAAACA
>sampi #solo-LTR_of_Unknown;Retrotransposon;Unclassified
TGTTAGGATTGTAGTGCTGAGGACTGCATATAAGGTGATTCTTCATGTTATTGTCTTTAGCAGGGATATCGGATAAGCTAGTAAACCTCCGACTGATGGTCATTGACGTTTATGAGCCATTCTGAACTGTCTTTGTCTTACCCCCTCATAAGCTAGAAGTGGAGGAGACCGAATGTGGATTCAGTGTTATCAGATTAACGTAATTTAAATATGAGTTGGAATCCCCTTGGGATTGTGCTTGGAAAAGGAAACTAACAATTCTAGATTACATAATCATATATATGAGTGGTTAATATACACTACCCCTATACAGTGTGTATTACA
>san #solo-LTR_of_Tca4;Retrotransposon;Ty1
TGTTCGCTATAGGGTAGGTCTTCCAAGCTAATTTTACCCGACACAAGATGAAATATTTTCTGTTGAGCACTCGTTGTCGACAGTGAAAAATTTTCACTCAAGAAAATATTTTATCATCACTTTTTCTAGAAGGGAGGTTCAAGTGTTGGAGAATAGACAGCGAACACCTGATATTCCCAAGGTCGAATTAGATTGAAAGATAAATAATAGTCATATTTATTTTGTATTTAGTCAATAAATTATCTTTTTATATTTAAATTCTTAGTATTGTCATACCACGTAGATTGATACGGACATACTTAGCACATTTAACATATATTAAGCACCGATTACCTGTGACATTCCGGAGTTTACTGTTTCGCGCACGCTGGCAGACGAACA
>tara #solo-LTR_of_Unknown;Retrotransposon;Unclassified
TGTTCGATTTCTACTTGATGCAAGACTTGCATAAGTAGGTTTTGTGCAACTTGGTTAGTAGACCACTGCCAAGACCAGTGCAATCACCTGACGTTGCTAAGTAGTGTAGGTATGTGAGCAAGCAGGCATATACGCCTAACGGTGTTACTTACTTCCTACGGAGTAAGGGTGGTGGGTATCGCCTTTGACCTTGTGAACGAGAAAATATATATAGTAGATTTTCTCGTCTGTTCAATCTGGTTGAGGCGTGGGTTAACACCGCACTTTCATACCATTTTTTGATTA
>Tca1 #Full_length;Retrotransposon;Ty1
TGTTCGCTATAGAGAGATTTCCTAGCCGGAATGCACGACAATCCTGAGACGGAAGTCGATCGTCGATGCCCATGGTGCGTGGTGAAAAATTTTCTTAGAAAATTTGTTCTTTCCTTCAACTGCTTTTAAGAAAGGGAGGTTCAAGTGGTTTAAGTACGACGGTCACAAAGATTGCGGCTTATGAGGCCCGAACTGAGTTGAAATACAAAATCAAGATATAATTATATACCTTACTTGTCTATATTGTTTTATAATACATTCTTCAGATATTTAAATTTCTGTGTATCATCCTATAAAACAGAGATACATTCAGTACATTTAGTATACTGAGTGAACTGGTACCTGTGACATTCAAGATAACTGTTTCGCGCACGCTGGCAGACGAACAGATTAGAAGCT…
>Tca10 #Full_length;Retrotransposon;Unclassified
TGTAAGGTAGTACGTACTATGTCAATCCTATCCAGTGGACACTACTCTTCCGTAATCGGACTATCGCCACGCCACTGAGACTCGGGTATAAATACCCTCCTAGACGCCCTTGTCGTCGACTACTTCTATAGGCTTTCTATATAACACACTAGAGCAAATACACGCTATTCAGCATTGCCTAATCATCACATGGAGGTCCTATCAAACGAATCAAAGTACCATTTGTACTGTTGTATAATTCGGGGATTTTCCAAAGCTGCTGCTTTTTGTACCTGGCTTTTTTCACTTTTTCTATCATTAGTTTTGTGTTTGCCAAAGGTTTTTACATCAGCTTGGTCCCCTGACCTTGTCAACACGTCATTCAGTCATCTTTTATTCAACTCATCAATTCAGTCCTGG…
>Tca11 #Full_length;Retrotransposon;Unclassified
ATGTCACACACTCAGCCAACATTACCGCGAATACAGGCTGATCAGGTCAAGTGCGACATCTAGACAATTACTCAACATCTTACAAATGATGCACAATGACTGCAAGTAATTGCCTACGACATTTTAGGGTAACAGAAACTTAAAGTAAGTGTAATAAGAATTGGTGGACACACATCCGTTCTATTTTGCACATAAACTACTTTATTTAAGAGAAATATTTAGAAGAAGAAAAAGAATTATTTTATATTATTTAGGTTTAATTAGAGAAATGAAAGTACTATATACTTGAGAGCAATTAAGGTGAACATTATCACTGGTAAAAGGAGTTAAATGTGTAACCATTCATGAATAATGGTTCAACCTGAGTCAGAGGAATTGAATACTAATGGAAATCTCATA…
>Tca12 #Full_length;Retrotransposon;Ty1
AGAATTTCAGATGAAGTATAAATTCAGATGAATGTCCTCTTGAATTAGTAATTTTGCAATTTAGAAAATAATGAAATCTTTATTACTAAAATTGCTAATAACCTCAAATAGAGATTTTATTCAGATTAGAAGTTCTTTCACAAGAATTACATATCTTCTTCAAGTGATCAGAGATCATGGCTGGTAGAACCAGAAGTAGAACTAGTGGTGGGGATACCCCAGAAAACCACACAAATGTTGTTCCTCAAGAAAACTTGAGAGGAGAAAACAATTCACATAGTGAAAATGCTTCAGTCAGAGACGAATAAGCAAGCATTATTCACGATATTCCAAACCAGTCAGACGACATGGAAGTTGAACGTCCATTTATTTTTGTAAAGCAATATTCTGATGGTAGAG…
>Tca13 #Full_length;Retrotransposon;Ty1
TGTCGTGGAGTACGACGTTATCAGGTAAATGATGCTGATTTGATAACTCGTGCACGACATGGACTAGAATTACACTTAATTCGCATAGTACGAGAGAAGTGAGAAGTGTAATTTAGTGTTGTTACCGTTCGGTAATTGATATTGTTTAAGTGAGCCAATGAGAACGCTTTACACTATTGGTTCACACACGCTGAATTGTTAGTGAAATTATATAAATGAAGGAAATTCAACAAATAGAATAAATAGTTCCTTTTCACCTCATGCGACGTGAGAGTGAATTAGGGAATACAAGAATATAAGAGCTTACCATATTAAATAACCTTAAACGAAGTTTACTACATTCTAGGCGTTTCACTTAAGAGATTAGTATCGTGATCTGTTTACATCAATTGCATTGCA…
>Tca14 #Full_length;Retrotransposon;Ty1
TGTTGTGATAAATATGTTGTGATGAATAATGTAAGACTACATTGCACTGTGGAAATATAATACAGAGATGAGATATAATACACCTGTATAAAGTGAGGAATTAATCTAAATGTGTTATAATAATAATACGCCAAGATTAATGTGAATAGAGTGTGTATACCAAGATTTACTAACATGTGTGTTTATCCTCGGGTACTTGACCTTTAAGACCGAGAATAATTAGAATGTGCCGAGTGTGTTAGAAAGAGGAAGGCGGACTATAAATATGCGAGAATCCCCTTTAGAGACTAGCCACTAATAAAAAAGATGAACTTGCTCAACTTAAGCAACTAATCAACTAACTGACTAAATTAATATACTCAGTATAGAATATCACCTTAATATTCTATACAATACTTT…
>Tca15 #Full_length;Retrotransposon;Ty1
TGTTGATATGGTAATGTTCAGTTCGTAAGAACACGACAAATGGAAGTTGCCAGAAAGATCTAGATGAATAAAGTGGTAGTGCAGAAATGCACAAAATATGAATTACTGTTAACAAATGACTGCGTTAAGCTACTGTAAAGTCATTTTACTGTGAAAGTCCAAAGTGTCCATATGAAAGTCACATATGTGGTAGAATATGCTAGAAGAATCATATACTGGGGAATGATCAAGAGTGGCTGTGTTTCACGGTTATACTCGAGTATATTTGCCACCGATGACTTTATATGGTGTAAATCTCACTGACTATAAACGTACAACCTAGTTGTAAATGTACTGTATTAAAGTTTACTAACCGACTATATATAGAGGGCCTACTTCCTTGAAGTTGGCATTAGTTTA…
>Tca16 #Full_length;Retrotransposon;Ty3
TCAGTTAATGCGATACTTACTATTGTGGATATGTTTACAAACAGAGTTCATTTATTTCCCATTTCAAGCGATTTTTATCAATCGATTTTTAAGAGCCTCAATGTACGCTCCCGGCTTACCGTAGCAATGCACCAGCAGGCAAATAGACGCGTGGAAAATCGAAATAAATTGATTGAGACTTATTTGCGGTTATACATTATTGAAAACTCCCAGTGGCCGACTTTACTTCCCATCGCGGAGTTTGTCCTTAATTCCCAACCGCTGACCAGTTTGGACCATAAGAGTTCCTCTGAGGTGGATCTTGGTTATGTTCCTTAGTCTCCTGTTGCTATATTATTTCCACACAACCAGGAATCTCTTTCTCGTCAAGCCTTAGATATTACAGAGCTGCTCACTCGG…
>Tca17 #Full_length;Retrotransposon;Ty3
ATTTTGATTCCAAGATTACTGTATTTGTTGACACCATTGAATAATCCTCTTGTCGACAATGCTGGTAAACGATCTCCGATTGTGCATTTGACGGCATCTATTGCTGCTTTTGAAAAACTTATGTCAGTCATTGCTGACTTACCCTCATTGTATGCTTTTGATGAAAATAAACCGGTGTTGGTATTCACAGATGCCTCCCAATTGGCTATTGGAGCAATAATCACTCAAGAACATCTAATCCAAGGTCAAAAACTGTTGGTCCCAGTGGCGATGGTATCTCTCCGACTTTCAGCTACTCAACAACGTTACAGTACTTTAGAACGAGAGTTGCTCACCATTGTGTATGTACTACAGAAGTACAAACAGTTTATGAGCAGGGAAGTCCAATTCTATACCGAC…
>Tca18 #Full_length;Retrotransposon;Ty1
TGTGCGTACTTGAACGCAGACCTTAAGGAAGAACTGTATATCAGAGCTCCTCCACACATGAATGCTAAAAACAAGGTACTAAGACTAAATAAATCACTCTATGGACTAAAACAGAGTGGAGCAAATTGGTACGAACTAATCAGATCGTTCCTAATTAAGAAATGTGACCTGATTGAAGATAGAATGTGGAAATGTGTTTTTAGAGACAAAGAACCGCTGAAACTTATTATATGTCTGTACGTCGATGATATCCT
>Tca19 #Full_length;Retrotransposon;Ty1
TGAAGAGACACACCTAGACTGCGTTAGGTAGTGCCGAGGATGAATATCCTACGACAACGGGAAAATGCAATGTACCCGGAAATATCAGAGCAGAGAGCGGGGAGCCGGTGACGCCGGGCAGTAAACGTGGTGCGAAATGTCGAGAATAATAGTATATAAATAAGTAGATTTCCCCAGGTGTAATTTGGGTCAGGTATAGAGGGCGGACGAGGTAGGCAAGAACCCAATTACGACACGTTATAGTAGTAATATATATGTTAACCATACTACACGACTATAAACGCTCATATACGCTCACACGCATCTATTCAGATTAGAAGTCAAAAGACGGTTCGTTCCAAGTCTTGTCACTATACCTGAAAATATTCATTTTACACCATTTCTTATGGATTTTAAAAA…
>Tca2 #Full_length;Retrotransposon;Ty1
TGTTGGTTTGTGCACTATTTTGTGTCAGAAACTGATCAATGAAAATGATGGTTATTATGAGAATGGAAAATTTTTCCATCACACATCAGGTGATGACAGAACTAAACTATATTGTGTAGTATAAATAAGGGTATGAAATACCAACATCCCAGAATATCAACGAGATAGAAGGGAGGAGTTTCAATATATATCTTGTGAATAATAACTTCGTTCTAATTCACTATACACAACTAGACGTGTACACGCTCAATCTCAGGTAAAGAAAGTTTATATTCCATCAGATTAGAAGTCGATAGTGATAATCATTTCGTCCCAAATTAGCGTTGTATAAATTCAGTCCTCAGATTTGTATTATTGATTGATAGTTTCGAAGTTTGAAGGTACAGAATTTCACAAGAT…
>Tca3 #Full_length;Retrotransposon;Ty3
TGACGATCCTGCATATTTCGTCATAATTCACACATTCTTAAAATTATTCACACATCCTTGAAATGTGTTAATATTCCCAACATTATCAATTATATGTGTTCAGAATTGGTTGCAAAGTTATCAACTCAATTCACGCTATATAAACCTTACAATTTCTCTACATTTTTATATTTTTTTATATTGGCTTTTCTTTTAGAATCAATCAATACTTTTTTTATCATTTAGATACATCTTTCATCTATTAATAGATTATCTTTCTATATATCAAAACACGACACAGTCACGTGCCAAAAAGGATATAAGAAGGAACTTCAGAAAATTAATTTTCTGATTATACTACTTACTAGATTTCATAAAGTCAATATCTGATTGATACAACTTGGTTCATTATTCATAAAA…
>Tca4 #Full_length;Retrotransposon;Ty1
TGTTCGCTATAGGGTAGGTCTTCCAAGCTAATTTTACCCGACACAAGATGAAATATTTTCTGTTGAGCACTCGTTGTCGACAGTGAAAAATTTTCACTCAAGAAAATATTTTATCATCACTTTTTCTAGAATGGAGGTTCAAGTGTTGGAGAATAGACAGCGAACACCTGATATTCCCAAGGTCGAATTAGATTGAAAGATAAATAATAGTCATATTTATTTTGTATTTAGTCAATAAATTATCTTTTTATATTTAAATTCTTAGTATTGTCATACCACGTAGATTGATACGGACATACTTAGCACATTTAACATATATTAAGCACCGATTACCTGTGACATTCCGGAGTTTACTGTTTCGCGCACGCTGGCAGACGAACAGATTAGAAGCTTGGTAAA…
>Tca5 #Full_length;Retrotransposon;Ty1
TGTTGGAAAAATGAAATATGATCAATCCTGCATCTAGAACCTGTGGCAGAATGAAACCTACGAGATTATGAATGACTTGTGAATACAAGTTGAATGTTACAGAATGTTACCAAGAAGGTTACACTTGAATATATGAATGACTAGAAAGTGAATTGAATGTTACAGAACCTGAATAACAATGTTACACGAATGTGTGAATGATATGAGTTTATCTATAGTAATGTGACATATACACAAAGGTGTGAATGACCGAGAAAACAGATGTTACATTACGGGCACTGGAGAGTGCAAGTCTAAAGAATCTTGGAGTAGAAATAAGTAATATAAAAAGGACCAAAGATTCTTTAGAGAAAAGTAAATGAAACTATATTAGATTTTATATAACTAACTAACAAATAA…
>Tca63 #Full_length;Retrotransposon;Ty1
AAATGGTATCATTAGAACTGTATTGGAGAACATTAGTTTTGGTCCAACATTGCGTGATGATGGTATGTTTTTCGTATTATAGTACAATGATGGCTCAATGATTTATTTTAGGCTTATATGTGGATGATATCTTAATGGACAGAATTTCAGATGGAATCGTTATCAGATTTGTTGAGCAAGAGAGAGTTTATTTCGCGTTAAAATCAATTTAGGTCTCATGACAGAATATGTGAGATAAAATGTCCACGTAAGCAAAACTGGGTGATACTTTGAAGTAAGAGATACTCCTAAATAAGCAAACCAAGGATTTTAAACTACACAATTCGTATGGTAAAACGTGCTTTGAGTTCCAAATGATAGATGCGAGATACCAACAAAATAGAACTGTCGCAAATGCTG…
>Tca65 #Full_length;Retrotransposon;Ty1
TGTTGGTTTATGCGACGTTTGTGTCAGGGAAATAACACCTTGATATAAGTCGTGCGTATTAGATCAACATTGGTGAAAAATTTGCACTCATCGAGAGCCAGGAATTAGTATAAAAAGAAGAGAAAAGAAAGATATTTAGGATATTTATTATATAGAGACCGAGTTTCAATAGACACTTTTAGTGGGCGTAAACTTCATTCACTCTGTTTTTTGCTTATTACAAATTATCACCTATCGTGTACTAGGACTAATTCTCACGAATATTCCGTGTATACAAACAGATTAGAAGTCAATAGTGATAACCATTCTGCATTGGTCTAGGTCAGTTTGACCAATATTTGTTAATATCAAAAATAGTGATGAATAGAGTCTGCTAAAAGGTCATCAGTTATGGAATTT…
>Tca7 #Full_length;Retrotransposon;Ty1
TGTTGTAATATAGCTAATGCTAATTCTTGATTAGTGTGGAAAGCCTAATAAGGTTATATTGTGCACAGGTTAACTACCTTAATATAGTTATTGTTAATACAGTTATTGCTGTTGACTACTATTGTTATTGTTAAATTAAAGTGTTAGGTTGAGTTAATTGATTAGTGAAAACCAACTAACTACCGTATTAAATTATTGTATTAAGATTGATTCCTATTAAGGATAAAACAGAGAGTGTGTTAGAAAGAGAAAGGGTGGATTATAAATATGTGTAAAATCCCCTTTAGAGACTAACCACTAGAAATCTATTGATGGTTTCATATATAGAGATTAACGATTATATTTATAATATAAGTTGGTAGTTGCTAGTATATTTGAAAGCACTACAGTATAGTATGT…
>Tca83 #Full_length;Retrotransposon;Ty3
CTCTGTTTGATGAAGTTCCATTAATGGATATGGAGGAATTTTTGGATGAAGCTAGAAAAGGTCAAGTTGGTATGTTGCTTCTTAAGACTGAAGATGACGAAGATACAGCTGGTATGGTTGATGACAAAAAGGATATCATGTCGGTGGTTCAAGGTACAAATAAGAGTTATTTTGCTGAATTGATTAGGAATTACAAAGATATTTTCAAAGGTGAATTAGATCAGAAGCCACCACTGCATGGAAGTTGGGATCCAAAAATTGAAGTGGTACCCCATATTAGTCCTCCAGCTACAAGACAATATCCATTGTCGGTTCCAGAACAAGAAGAATTACGCAAGCAGGTGAAAAATATGCTAGATATAGGGTTAATCTCCCCCACTCCTCCACAAAGTCCGGGTT…
>Tca85 #Full_length;Retrotransposon;Ty3
TGTTGTATAATCAGCCTTGCTCGTTGTCTGATTTACAAGGCTTGGTTCTATTGGTTGTTTATTACCTTGGTGGCTGCGCACCATCTTGGCATTGAGCTATTTTCTATTTCTAATTTCGGTATTTTGTTTACACCTTGTTAGACGAGTTCTTGATATTATTAAATTAGTTGGTTATTGAGTGGTCTGATGGTTCATCGTCACTCTAGTTTTCGGTCTATATAAGGGTCAGAGTTTTCCCTTTGTCTTCTTATATATTTTATATTCTTTTCTTAGTGAGTTTCCATACAGAATCAGAGTCAGAATAAAAGTTATTGTTTCGAGTTCTTCATATTAGTGTTTACATTTACAGCTGTTCCATAGGTCCTGCAAGTCGAAATATACATTAGTTGGTAGCATTGC…
>Tca9 #Full_length;Retrotransposon;Unclassified
TGTCGTATAGTAGCAACAAATCTTCCCAATGATTGGTATTTGAGCTACTTTGCACGACATGTGTTCTCTTACACTTGAACTGTATGTCCAAGAATGGAAACATATGCCGGAAGGACGTGAAACATGAGTTTGGTATAAAAGGAATAAGAAATGTCAAATATTTTATATAGTTATATATTTTAATTATGGGAAATTAAATGTTTATTCTGTTCTATAAGATTTAACCGTAGAGATTACATTTAAAGCCTATGGTCCAAATCTAAAAGATACTACAAATTCATTATGTCACATACTTAAATCAAATTCATCAAGCACCATTGCCTACACAGATTTAGAACGGGCTATATCATCATTTAAGTCAGACATTACTAATTTACGCTAAGGTGTTAGCTTATTGGA…
>theta #solo-LTR_of_Unknown;Retrotransposon;Unclassified
TGTTACGATGATGGCGTGTGGTTCTGCATACTAGATTACTTCAGTGGCAAATACATCACCAGCATAAAACGGTTGACAAGAGAAGCCTCCGACTTGTGGTCATTGACTGCGCCTCCGGGTTGCCAGTCTTTATCTTCCCCCCACAAGGTAGAATGGGAGAAGACAACATGTGGGCAGTTGTACATTCCTCACGGGAATATAAATAGACGTTGGAATCCCCCTGGGATTGGATTGGGAATAACGACTTAACTAACGAATGAACTAATGAACATCTTCTGGACTTTAGCTAGACTAACTATGATTACATAATCATCTACGTAGCCAATATACACTACTCGTCCACACTTCCACTACACACTCGTAACA
>titi #solo-LTR_of_Unknown;Retrotransposon;Unclassified
TGTTCGATTAGTACTAGATGCACGTCGTGCTAAAATGCATTTTGTGTGCATAAGCATAAAATGTCGAAGGCTTAACAGCTAATGTCACATGATGACAAGATATTGGAAAGCAGTTGTGAAGTAGCAGGCTTAGAAAGCATCTAGTACAAGCACAGTAAACTTACTTAAGAATGAGTAAGGGTGGTGGGCATCGCCTTTGACTAAGGAATGTCACCTTATGATATATACAGGTGACATTCTCCTGTAAGAAAGATGTAGAGTTTTTCTAGGGAGTAATCGACTAAATACAGTCAAAGGTGTGGGTTTTACTGTGTAAACTCTTACATCATTTAATCA
>toroa #solo-LTR_of_Unknown;Retrotransposon;Unclassified
TGTTGAAATTAATAATGGAGTAATCCTAGTCATGTGATCTAACCTAACACAAAATGTAAGAAGAGTTTTGTGTCTTGGTAGTCTGGACACGCAGAATGAAAGCTCTAGACGATAAAAGTGTACTTTATATAAAAGAAGACGAGAAGTCTTCTTTACTAACAAGTAGTGATATAGTAGACAACTAAAGTTTATAAGAATATATGTACAACAGGTGAGTTATTATCTATTAATTACTTAATCATATGCTAAGACAGACTCTGTGACACTCAGTACAATCTCGCA
>tui #solo-LTR_of_Unknown;Retrotransposon;Unclassified
TGTTGAGCTATATGGTATATCCACATACAGTATGTGGATGGGTACACGACCCGGGTGGTCTATATAAGGAGCTGGATTTCCCTTGGTTGTATCCGGTCAATCCAGGAACACTGAGGAAGTATATATCTACATACGTACTTATAGTGGTTACCCTAATATCACGTGTTCTCCTATACATAGCCTTCTGCGAATTCCAATA
>upsilon #solo-LTR_of_Unknown;Retrotransposon;Unclassified
TGTTATGGATAAATCAATTGATGTCAGTCGATACCATTATGTCAATATTCAAATGATCAGTTGTGGCCACGTCAGCAGCAAACAAGTGATCATCCTGGGCCACATAACCAGCGGTTAGATCACGCTAGACGTAGATTGATTATCAATGGGTTCCGATCTCGGCTTTAGCCAATCCGAAGACTATAAATAGGTTTGAATTTTACTCTAGTTTACAGTTGTTTATCTTGTTCAATATACGATCATAACCTTTAAATTAGCATAATA
>vau #solo-LTR_of_Unknown;Retrotransposon;Unclassified
TGAAGAGACACACCTAGACTGCGTTAGGTAGTGCCGAGGATGAATATCCTACGACAACGGGAAAATGCAATGTACCCGGAAATATCAGAGCAGAGAGCGGGGAGCCGGTGACGCCGGGCAGTAAACGTGGTGCGAAATGTCGAGAATAATAGTATATAAATAAGTAGATTTCCCCAGGTGTAATTTGGGTCAGGTATAGAGGGCGGACGAGGTAGGCAAGAACCCAATTACGACACGTTATAGTAGTAATATATATGTTAACCATACTACACGACTATAAACGCTCATATACGCTCACACGCATCTATTCA
>weka #solo-LTR_of_Unknown;Retrotransposon;Unclassified
TGTAAAGCCAACAATAGTTGTAATGTCCGCAGGTCGTGTGCGTGCTAATACCCCACTGGGTTACCCATCCTGCTCGTTATATATAGACCTTTAGTTCCCTTCTGTCTTTTATATTATACGTAGTTCCTCTCCAGAGGCCATAGAATGCACTCCTTTATTAATACA
>whio #solo-LTR_of_Tca12;Retrotransposon;Ty1
TGTTCAGTTTTGGACTAAGATGCACGAAAGTCAAAGTATCTTTGTGTCGACTTGGAACAAGATAACTAAAATAGAGAAATATGATTGGTGACATAGTCACTAGTAAGATATGTAATGCAGGTTATAGCATTGAGAAATTGCTCTCAAACTAATATGACTTACTCAAAGAGTAAGGGAAGGTGGGTATCGTTTTTGACAAGAGAATTTCAGATGAAGTATAAATTCAGATGAATGTCCTCTTGAATTAGTAATTTTATAATTTAGAAAATAATGAAATCTTTATTACTAAAATTGCTAATAGCCTCAAATAATGATTTGGGCATATTAGTAAAATAGAGATTTTATTCA
>xi #solo-LTR_of_Unknown;Retrotransposon;Unclassified
TGTTCGCTGTGGAGTAAAATAGTGAGCATTTTACACGACAATTCTAGCAGAAATCTTCTGACGTTGTCAACGACGAGCAGTGAAAAATTTTCACCAGAAAACTTTTCTTTGATACTTTTTCTTTTTAGAAATTGGAGGTTTAAGAGGTCAGTTTGGAACATTCTACGTTAAAGATTGCAGCTGATAGGATTATAACATATTATCAGTGTCTATATTTAATTACTGAGTAGTTTTATTCTGTTTAATAAACTTTCTTTTTATATTTATAATATTTTGTATTGTATCTTTGTACTACGTGCATTAATACCTACATCTATTGTTAGATATATTGCTATTGCGGATCCTGCGACTTCCCAACACTGTTTCGCATACCTACGCAGGCGAACA
>zeta #solo-LTR_of_Tca7;Retrotransposon;Ty1
TGTTGTCATATAGCTAATGCTAATTCTTGATTAGTGTGGAAAGCCTAATAAGGTTATATTGTGCACAGGTTAACTACCTTAATATAGTTATTGTTAATACAGTTATTGCTGTTGACTACTATTGTTATTGTTAAATTAAAGTGTTAGGTTGAGTTAATTGATTAGTGAAAACCAACTAACTACCGTATTAAATTAGTGTATTAAGATTGATTCCTATTAAGGATAAAACAGAGAGTGTGTTAGAAAGAGAAAGGGTGGATTATAAATATGTGTAAAATCCCCTTTAGAGACTAATCACTAGAAATCTATTGATGGTTTCATATATAGAGATTAACGATTATATTTATAATATAAGTTGGTAGTTGCTAGTATATTTGAAAGCACTACAGTATAGTATGT…
>Zorro1 #Partial;nonLTR_Retrotransposon;L1
TGTTAGAAAAGTAGCTGAACAAGTCATTGGCTACTTCCCAACTTTTAACGACGGTGCTAACAACATGAAAGTATTTGGTACTACTTATGACAATGTTGGATTGTTTAAATTGAAGCATCCAGCTGAGAAATGGAATGTGAAAAAATGTATTAAGATGTTTTTCAACGACGACAAGTCTGACTATTCAGATGAATTGTTAAGACTTGCTTACCTTCCAGCTACTGATTACAACATTGAATTCACTATTCTTGACAGTGAAGTTCACAATGCTAAAAGGGGTACTCGTAAAGCTTATTCTTCAAGAAAATCAACTCACAGCTACTTCCTCATTGGATATAACGGTAAATCTGTTCCAAAACAGACCCGTTACTTTTTGGACAACCATCGTTTAACACTCTG…
>Zorro2 #Partial;nonLTR_Retrotransposon;L1
CGCCCAGGGTAATCAAACTGATACATTCAGTTCTGAATTAGATAGGATTTCTTACCCTTTGAAAAAGGGGGAGGAAATCAAACGTTATATAGTTTAGATGAAAAAGATCAATACCGGTAAATCTACAAGGTCTTTTTTTGTTATTGGTTTCCAAGGCAAAAAAATTCCAAAGAGAAAGAGTGTTTATGAAAGGTATATATTTAACGTTGGCGCTGACAAAGACATTTTGTGATAGCTGCAGAGGAGTTGGTCATAGCAGATGGGATTGCAAGTCGGTAAAATATTGTCACAGATGCAAATCTACTAACCACCCAACAGGAAAACACAACCAATTCATAAAACAACAAACCAAAAAACAACAACAACAACAAAACTCAAAACCCTCAAACAACAACACCA…
>Zorro3 #Partial;nonLTR_Retrotransposon;L1
AAAAAAAAAAAAAAAAAAAAAAAAAAAAAAAAAAAATTATTATGACTACGAACGGTACTAATGGTTTTGATTTTGCTGATAAAGGTGATCATCCGCCTCGGCAGTCTCAAGAGAATCCCCCTGGGAATTTTCAAGAGCTGCCGTTAGATGGTGGTCAAATTCGGAAATCATCGTCGAACGATGGTGTTTCCAACAACGTCGAATTCAATACAAATACAAATGCGCACGAGTCGTGGGCTGACTACCCTGAATCAGACCAGATGGATACTGATTCATCTGAATACTATACAGAAGATGAAAACGAAGAAGGAAAGATCCCCAAAGGTCCATACCATCAATTTCAAAATGCTAATAAATTTACTTACTTTACACCAGAAACTGCAACAACATTAGTTGCTC…
