# Supplementary material for: Candida albicans isolates contain frequent heterozygous structural variants and transposable elements within genes and centromeres
Source: HighWire-hosted journal article supplement (doi:10.1101/gr.279301.124), 2024-10-22
Supplement: Supplemental_Table_S2.xlsx [file Supplemental_Table_S2.xlsx]

## Sheet: PCR data
Supplementary Table S2. Strain Table clinical isolates (including SRA for the long reads and PCR results)
Isolate	Infection site	Geographic location	SRA	Source	CEN4 Orientation (Reference: 1203/1186; Inversion: 1203/491)	Cirt2 CEN4-proximal presence (1202/1205)	Cirt2 right arm chr4 presence (1200 and 1204)	Mating type (MTLa: 521/522; MTLα: 523/524)	CEN5 Orientation (Reference: 1325/1324; Inversion: 1324/1326)	CEN5 solo-LTR psi presence (1325/690)	CEN5 solo-LTR episemon presence (847/848)
SC5314	disseminated candidiasis		SAMN34718953	Gillum et al. 1984	R/R	Present	Present	a/α	R/R	-/+	-/+
L26	vaginal	Iowa	SAMN34718954	Wu et al. 2007	R/I	Present	Absent	a/a	I/I	-/+	-/+
P75063	Bloodstream	France	SAMN34718955	Wu et al. 2007	R/R	Absent	Present	a/α	R/I	+/+	-/+
P60002	Bloodstream	Arizona			R/R	Absent	Present	a/a	I/I	-/-	+/+
P87	Oral	South Africa			R/I	Absent	Present	a/a	R/I	+/+	-/+
P75016	Bloodstream	Israel			R/I	Absent	Absent	a/α	R/I	+/+	-/+
GC75	oral (healthy patient)	South Africa			R/I	Absent	Absent	α/α	R/I	+/+	-/+
P94015	Bloodstream	Utah			R/R	Absent	Absent	a/a	R/I	-/+	+/+
P57055	Bloodstream	Omaha			R/R	Absent	Absent	a/α	I/I	-/-	-/-
P78042	Bloodstream	Indianapolis			R/R	Absent	Absent	a/α	I/I	-/-	-/-
P34048	Bloodstream	Turkey			R/R	Absent	Absent	α/α	R/I	-/-	-/-
P75010	Bloodstream	Belgium			R/R	Absent	Absent	a/α	R/I	-/+	-/+
P76067	Bloodstream	Ontario			R/R	Present	Absent	a/α	I/I	-/-	-/+
P76055	Bloodstream	Iowa			R/I	Present	Absent	a/α	R/I	-/-	-/+
P57072	Bloodstream	Iowa			R/I	Present	Present	α/α	R/I	-/-	-/+
P78048	Bloodstream	Manitoba			R/I	Present	Absent	α/α	R/I	-/+	-/+
P37037	oral (healthy patient)	Wisconsin			R/I	Present	Absent	a/α	R/I	-/+	-/+
P37005	oral (healthy patient)	Florida			R/I	Present	Absent	a/a	R/I	-/+	-/+
12C	oral	Michigan			R/I	Present	Absent	a/a	I/I	-/+	-/+
P37039	Bloodstream	New Jersey			R/I	Present	Absent	a/α	I/I	-/+	-/+
19F	vaginal	Michigan			R/I	Present	Absent	α/α	I/I	+/+	+/+
AMS2996	Blood culture	Nebraska			R/R	Absent	Absent	a/α	I/I	-/-	-/-
AMS2998	Blood culture	Nebraska			R/R	Het	Het	a/α	I/I	-/-	-/+
AMS3314	Sputum	Nebraska			R/I	Present	Absent	a/α	I/I	-/+	-/+
AMS3316	Sputum	Nebraska			R/I	Het	Het	a/α	R/I	-/-	-/+
AMS3318	Blood culture	Nebraska			R/R	Present	Absent	a/α	R/R	-/-	-/-
AMS3320	BAL	Nebraska			R/R	Present	Absent	a/α	I/I	-/+	-/+
AMS3322	Sputum	Nebraska			R/R	Absent	Absent	a/α	I/I	-/-	-/-
AMS3324	Sputum	Nebraska			R/R	Absent	Absent	a/α	I/I	-/-	-/-
AMS3326	Sputum	Nebraska			R/R	Absent	Absent	a/α	I/I	+/+	-/+
AMS3327	BAL	Nebraska			R/I	Absent	Absent	a/α	R/I	-/+	-/+
AMS3328	BAL	Nebraska			R/I	Present	Absent	a/α	I/I	-/+	-/+
AMS3329	Bronchial Wash	Nebraska			R/R	Present	Present	a/α	I/I	-/-	+/+
AMS3330	Tracheal	Nebraska			R/R	Absent	Absent	a/α	I/I	-/-	-/-
AMS3331	Abdominal Abcess	Nebraska			R/I	Het	Absent	a/α	R/I	-/-	-/+
AMS3332	Pelvic Abcess	Nebraska			R/R	Present	Absent	a/α	R/I	-/-	-/-
AMS3333	Bronchial Wash	Nebraska			R/R	Absent	Absent	a/α	R/I	-/-	-/-
AMS3334	Bronchial Wash	Nebraska			R/I	Present	Absent	a/α	R/I	-/-	-/+
AMS3335	Bronchial Wash	Nebraska			R/R	Absent	Absent	a/α	I/I	-/-	-/-
AMS3336	Endometrial	Nebraska			R/R	Present	Absent	a/α	I/I	-/+	-/+
AMS3337	BAL	Nebraska			R/R	Present	Absent	a/α	R/I	-/+	-/+
AMS3339	Skin (Buttock scraping)	Nebraska			R/I	Present	Absent	a/α	R/I	-/+	-/+
AMS3344	Body fluid - on blood agar	Nebraska			R/R	Present	Absent	a/α	R/I	-/-	-/+
AMS3346	Chest Catheter	Nebraska			R/I	Present	Absent	a/α	R/R	-/+	-/+
AMS3348	Bronchial Wash	Nebraska			R/R	Present	Absent	a/α	I/I	-/-	-/+
AMS3350	Bronchial Wash	Nebraska			R/R	Absent	Absent	a/α	R/I	-/-	-/-
AMS3352	Bronchial Brush	Nebraska			R/R	Absent	Absent	a/α	I/I	+/+	+/+
AMS3356	Bronchial Wash	Nebraska			R/R	Absent	Absent	a/α	R/I	+/+	-/+
AMS3358	BAL	Nebraska			R/I	Present	Het	a/α	R/I	-/+	-/+
AMS3360	Bronchial Wash	Nebraska			R/I	Present	Het	a/α	I/I	-/+	-/+
AMS3362	Leg wound	Nebraska			R/R	Absent	Absent	a/α	R/R	-/+	-/+
AMS3364	Blood culture	Nebraska			R/R	Het	Het	a/α	I/I	-/-	-/+
AMS3366	Urine	Nebraska			R/I	Absent	Absent	a/α	I/I	+/+	-/+
AMS3368	BAL	Nebraska			R/R	Absent	Absent	a/α	R/I	-/-	-/-
AMS3370	Bronchial Wash	Nebraska			R/R	Present	Absent	a/α	R/I	-/+	-/+
AMS3372	Liver (source drainage)	Nebraska			R/R	Present	Absent	a/α	I/I	-/+	-/+
AMS3375	Abdominal wound	Nebraska			R/R	Absent	Absent	a/α	I/I	-/-	-/-
AMS3377	Bronchial Wash	Nebraska			R/R	Absent	Absent	a/α	R/I	-/-	-/-
AMS3378	Bronchial Wash	Nebraska			R/R	Present	Absent	a/α	R/I	-/+	-/+
AMS3379	BAL ("purity" isolate)	Nebraska			R/R	Absent	Absent	a/α	I/I	-/-	-/-
AMS3380	BAL	Nebraska			R/R	Absent	Absent	a/α	I/I	-/-	-/-
AMS3381	BAL	Nebraska			R/I	Present	Absent	a/α	R/I	-/-	-/+
AMS3382	Nails	Nebraska			R/I	Present	Absent	a/α	I/I	-/+	-/+
AMS3383	BAL	Nebraska			R/I	Present	Present	a/α	I/I	-/+	-/+
AMS3384	Sputum	Nebraska			R/R	Absent	Present	a/α	R/I	+/+	+/+
AMS3385	Bronchial Wash	Nebraska			R/R	Absent	Absent	a/α	R/I	+/+	+/+
AMS3386	Abdominal wound	Nebraska			R/R	Present	Absent	a/α	R/I	-/+	-/+
AMS3388	Bronchial Wash	Nebraska			R/R	Absent	Absent	a/α	R/R	-/-	-/-
AMS3389	Sputum	Nebraska			R/R	Het	Absent	a/α	R/I	-/+	+/+
AMS3390	Body fluid	Nebraska			R/R	Het	Absent	a/α	R/I	-/+	+/+
AMS3391	Boy fluid	Nebraska			R/R	Het	Absent	a/α	R/I	-/+	+/+
AMS3392	Wound	Nebraska			R/R	Absent	Absent	a/α	I/I	+/+	+/+
AMS3393	Blood culture	Nebraska			R/R	Present	Absent	a/α	R/I	-/+	-/+
AMS3394	Blood culture	Nebraska			R/R	Present	Absent	a/α	R/I	-/+	-/+
AMS3395	No detail given	Nebraska			R/R	Absent	Absent	a/α	I/I	-/-	-/-
AMS3396	No detail given	Nebraska			R/R	Present	Absent	a/α	R/R	-/+	-/+
AMS3602	Blood culture	Nebraska			R/I	Het	Absent	a/α	R/I	-/+	+/+
AMS3603	Blood culture	Nebraska			R/I	Het	Absent	a/α	R/I	-/+	+/+
AMS3605	Bronchial Wash	Nebraska			R/I	Present	Present	a/α	R/I	-/-	-/+
AMS3606	NA	Nebraska			R/R	Present	Het	a/α	R/I	-/-	-/+
AMS3609	Nails	Nebraska			R/R	Absent	Absent	a/α	R/R	+/+	+/+
AMS3610	Bronchial Wash	Nebraska			R/I	Present	Present	a/α	I/I	-/+	-/+
AMS3611	BAL	Nebraska			R/R	Absent	Het	a/α	I/I	-/-	-/-
AMS3612	Bronchial Wash	Nebraska			R/I	Present	Present	α/α	R/I	-/-	-/+
AMS3614	NA	Nebraska			R/R	Absent	Absent	a/α	I/I	-/-	-/-
AMS3615	Urine	Nebraska			R/R	Absent	Absent	a/α	I/I	-/-	-/-
AMS3700	BAL	Nebraska			R/R	Absent	Absent	a/α	R/R	-/-	-/+
AMS3701	Bronchial Wash	Nebraska			R/I	Present	Absent	a/α	I/I	+/+	-/+
AMS3703	BAL	Nebraska			R/R	Absent	Absent	a/α	I/I	+/+	+/+
AMS3706	BAL	Nebraska			R/R	Absent	Absent	a/α	I/I	-/-	-/-
AMS3707	Urine	Nebraska			R/R	Absent	Absent	a/α	I/I	-/-	-/-
YJB8638-FH1	Serial isolates from one patient	Marr et al 1997			R/I	Absent	Absent	a/α	I/I	-/-	-/-
YJB9538-FH2	Serial isolates from one patient	Marr et al 1997			R/I	Absent	Absent	a/α	I/I	-/-	-/-
YJB9323-FH3	Serial isolates from one patient	Marr et al 1997			R/I	Absent	Absent	α/α	I/I	-/-	-/-
YJB9542-FH4	Serial isolates from one patient	Marr et al 1997			R/I	Absent	Absent	α/α	I/I	-/-	-/-
YJB9185-FH5	Serial isolates from one patient	Marr et al 1997			R/I	Absent	Absent	α/α	R/I	-/-	-/-
YJB9544-FH6	Serial isolates from one patient	Marr et al 1997			R/I	Absent	Absent	a/α	R/I	-/-	-/-
YJB9547-FH7	Serial isolates from one patient	Marr et al 1997			R/I	Absent	Absent	α/α	I/I	-/-	-/-
YJB8640-FH8	Serial isolates from one patient	Marr et al 1997			R/I	Absent	Absent	α/α	R/I	-/-	-/-
YJB9549-FH9	Serial isolates from one patient	Marr et al 1997			R/I	Absent	Absent	a/α	I/I	-/-	-/-
