# Supplementary material for: Candida albicans isolates contain frequent heterozygous structural variants and transposable elements within genes and centromeres
Source: HighWire-hosted journal article supplement (doi:10.1101/gr.279301.124), 2024-10-22
Supplement: Supplemental_Table_S3.xlsx [file Supplemental_Table_S3.xlsx]

## Sheet: CEN Primers
Supplementary Table S3. Primer table and primer conditions
						PCR parameters
Primer ID	Primer Number in Figures		Sequence (5' -> 3')	Description			CEN4 reference and inversion			Cirt2 orf19.3820 and orf19.2866			CEN5 reference and inversion			CEN5 solo-LTRs
1186	1	1	ATGGTTCTGATTGTTGCCTCG	CEN4 orientation - forward Reference		Initial denaturation	1x	95	05:00:00	1x	95	05:00:00	1x	95	05:00:00	1x	95	05:00:00
1203	2	2	﻿ATCCCAAAGCCGATCTCCTC	CEN4 orientation - reverse Reference and Inversion		Denaturation		95	00:30:00		95	00:30:00		95	00:30:00		95	00:30:00
491	3	3	CGGATGTCTGCTTGCTCAGA	CEN4 orientation - forward Inversion		Annealing	34x	57	00:30:00	34x	58	00:30:00	34x	60	00:30:00	30x	58	00:30:00
1202	4	4	﻿TTGAGGAGATCGGCTTTGGG	CEN4 Cirt2 orf19.3820 - forward		Extension		72	03:00:00		72	02:30:00		72	03:30:00		72	01:00:00
1205	5	5	﻿TCCACATTTCGGTGCTGTGATCC	CEN4 Cirt2 orf19.3820 - reverse		Final Extension	1x	72	05:00:00	1x	72	05:00:00	1x	72	05:00:00	1x	72	05:00:00
1204	6	6	﻿TGTCGGTCTCAATGTTATCTGGG	Chr4 Cirt2 orf19.2866 - forward		Hold	1x	4	(hold)	1x	4	(hold)	1x	4	(hold)	1x	4	(hold)
1200	7	7	ATAGCCTTCCTTCATACATAGGC	Chr4 Cirt2 orf19.2866 - reverse
1324	8	8	GCTTACAGGTTGTACCGTATACGG	CEN5 orientation - reverse Reference and forward Inversion
1325	9	9	AAGAGTCCCGAAGACAGTCG	CEN5 orientation - forward Reference and forward psi left solo-LTR
1326	10	10	AGATGAAACCGGGGACAACC	CEN5 orientation - reverse Inversion
690	11	11	AAACAATCCGAACAAGCAGAGGGC	CEN5 psi left solo-LTR - reverse
847	12	12	CCAGGGGACCAAAATAAGCGA	CEN5 episemon core solo-LTR - forward
848	13	13	GTTGCTGCTGCCCTTAGGAG	CEN5 episemon core solo-LTR - reverse
521			TAAGAATGAAGACAACGAGG	MTLa forward
522			CGTGTTTTTCTGCTATCAATTCC	MTLa forward
523			TACATTCTGGTCGCGATGCTC	MTLalpha forward
524			GTAATCCAAAGCCTCGCATAA	MTLalpha reverse
