# Supplementary material for: Candida albicans isolates contain frequent heterozygous structural variants and transposable elements within genes and centromeres
Source: HighWire-hosted journal article supplement (doi:10.1101/gr.279301.124), 2024-10-22
Supplement: Supplemental_Table_S4.xlsx [file Supplemental_Table_S4.xlsx]

## Sheet: Sheet1
Supplementary Table S4: SVs
chromosome	start	end	isolate	type	subtype	zygosity
Ca21chr1_C_albicans_SC5314	7135	7358	L26	SV	DEL	homozygous
Ca21chr1_C_albicans_SC5314	42180	46167	L26	SV	DEL	homozygous
Ca21chr1_C_albicans_SC5314	84910	85192	L26	SV	INS	heterozygous
Ca21chr1_C_albicans_SC5314	277085	277402	L26	SV	DEL	heterozygous
Ca21chr1_C_albicans_SC5314	280126	280328	L26	SV	DEL	heterozygous
Ca21chr1_C_albicans_SC5314	295688	295727	L26	SV	INS	heterozygous
Ca21chr1_C_albicans_SC5314	403868	404262	L26	SV	DEL	heterozygous
Ca21chr1_C_albicans_SC5314	428983	429015	L26	SV	DEL	heterozygous
Ca21chr1_C_albicans_SC5314	460239	466671	L26	SV	INS	heterozygous
Ca21chr1_C_albicans_SC5314	464835	464881	L26	SV	DEL	heterozygous
Ca21chr1_C_albicans_SC5314	468047	468136	L26	SV	DEL	heterozygous
Ca21chr1_C_albicans_SC5314	536670	537069	L26	SV	DEL	heterozygous
Ca21chr1_C_albicans_SC5314	641835	641883	L26	SV	INS	homozygous
Ca21chr1_C_albicans_SC5314	641835	641884	L26	SV	DEL	heterozygous
Ca21chr1_C_albicans_SC5314	804264	804301	L26	SV	DEL	heterozygous
Ca21chr1_C_albicans_SC5314	811820	812104	L26	SV	INS	heterozygous
Ca21chr1_C_albicans_SC5314	825362	825463	L26	SV	INS	heterozygous
Ca21chr1_C_albicans_SC5314	837533	837573	L26	SV	DEL	heterozygous
Ca21chr1_C_albicans_SC5314	842340	842374	L26	SV	DEL	heterozygous
Ca21chr1_C_albicans_SC5314	874017	874050	L26	SV	INS	homozygous
Ca21chr1_C_albicans_SC5314	878313	878849	L26	SV	INS	heterozygous
Ca21chr1_C_albicans_SC5314	918069	918583	L26	SV	INS	heterozygous
Ca21chr1_C_albicans_SC5314	1021329	1021614	L26	SV	DEL	heterozygous
Ca21chr1_C_albicans_SC5314	1023333	1023696	L26	SV	INS	heterozygous
Ca21chr1_C_albicans_SC5314	1036650	1036700	L26	SV	INS	heterozygous
Ca21chr1_C_albicans_SC5314	1054950	1055238	L26	SV	DEL	heterozygous
Ca21chr1_C_albicans_SC5314	1240017	1240071	L26	SV	INS	heterozygous
Ca21chr1_C_albicans_SC5314	1263727	1263759	L26	SV	DEL	homozygous
Ca21chr1_C_albicans_SC5314	1335132	1335348	L26	SV	DEL	heterozygous
Ca21chr1_C_albicans_SC5314	1337323	1337470	L26	SV	DEL	homozygous
Ca21chr1_C_albicans_SC5314	1344801	1344837	L26	SV	INS	heterozygous
Ca21chr1_C_albicans_SC5314	1347690	1347724	L26	SV	DEL	homozygous
Ca21chr1_C_albicans_SC5314	1390658	1390707	L26	SV	DEL	heterozygous
Ca21chr1_C_albicans_SC5314	1581068	1586220	L26	SV	INS	heterozygous
Ca21chr1_C_albicans_SC5314	1633022	1633070	L26	SV	INS	heterozygous
Ca21chr1_C_albicans_SC5314	1650310	1650356	L26	SV	DEL	heterozygous
Ca21chr1_C_albicans_SC5314	1653861	1653951	L26	SV	INS	heterozygous
Ca21chr1_C_albicans_SC5314	1654153	1654187	L26	SV	INS	heterozygous
Ca21chr1_C_albicans_SC5314	1656743	1656834	L26	SV	DEL	homozygous
Ca21chr1_C_albicans_SC5314	1688573	1688916	L26	SV	DEL	heterozygous
Ca21chr1_C_albicans_SC5314	1695486	1695521	L26	SV	INS	heterozygous
Ca21chr1_C_albicans_SC5314	1705024	1711461	L26	SV	INS	heterozygous
Ca21chr1_C_albicans_SC5314	1739487	1739530	L26	SV	DEL	heterozygous
Ca21chr1_C_albicans_SC5314	1749356	1749422	L26	SV	INS	heterozygous
Ca21chr1_C_albicans_SC5314	1808025	1808230	L26	SV	DEL	homozygous
Ca21chr1_C_albicans_SC5314	1815245	1815530	L26	SV	DEL	heterozygous
Ca21chr1_C_albicans_SC5314	1902457	1902969	L26	SV	DEL	heterozygous
Ca21chr1_C_albicans_SC5314	1935734	1936016	L26	SV	DEL	heterozygous
Ca21chr1_C_albicans_SC5314	1960969	1961018	L26	SV	DEL	heterozygous
Ca21chr1_C_albicans_SC5314	1966982	1967041	L26	SV	INS	heterozygous
Ca21chr1_C_albicans_SC5314	1985652	1986044	L26	SV	INS	heterozygous
Ca21chr1_C_albicans_SC5314	2073998	2074203	L26	SV	INS	heterozygous
Ca21chr1_C_albicans_SC5314	2099351	2099759	L26	SV	INS	heterozygous
Ca21chr1_C_albicans_SC5314	2146799	2153228	L26	SV	INS	heterozygous
Ca21chr1_C_albicans_SC5314	2164393	2164792	L26	SV	INS	heterozygous
Ca21chr1_C_albicans_SC5314	2180095	2180134	L26	SV	DEL	heterozygous
Ca21chr1_C_albicans_SC5314	2187468	2189619	L26	SV	INS	heterozygous
Ca21chr1_C_albicans_SC5314	2255368	2255723	L26	SV	INS	heterozygous
Ca21chr1_C_albicans_SC5314	2348380	2348919	L26	SV	INS	heterozygous
Ca21chr1_C_albicans_SC5314	2539036	2539066	L26	SV	INS	homozygous
Ca21chr1_C_albicans_SC5314	2557782	2558074	L26	SV	INS	heterozygous
Ca21chr1_C_albicans_SC5314	2610634	2617069	L26	SV	INS	heterozygous
Ca21chr1_C_albicans_SC5314	2718528	2723437	L26	SV	INS	heterozygous
Ca21chr1_C_albicans_SC5314	2747297	2747330	L26	SV	DEL	heterozygous
Ca21chr1_C_albicans_SC5314	2749657	2755254	L26	SV	INS	heterozygous
Ca21chr1_C_albicans_SC5314	2776149	2776410	L26	SV	INS	heterozygous
Ca21chr1_C_albicans_SC5314	2854704	2854905	L26	SV	DEL	heterozygous
Ca21chr1_C_albicans_SC5314	2887181	2887401	L26	SV	DEL	heterozygous
Ca21chr1_C_albicans_SC5314	2896469	2896557	L26	SV	INS	heterozygous
Ca21chr1_C_albicans_SC5314	2898406	2898438	L26	SV	INS	heterozygous
Ca21chr1_C_albicans_SC5314	2914688	2914722	L26	SV	DEL	heterozygous
Ca21chr1_C_albicans_SC5314	2919574	2919613	L26	SV	INS	homozygous
Ca21chr1_C_albicans_SC5314	2924659	2930180	L26	SV	INS	heterozygous
Ca21chr1_C_albicans_SC5314	2946564	2946600	L26	SV	INS	heterozygous
Ca21chr1_C_albicans_SC5314	2963204	2963236	L26	SV	DEL	homozygous
Ca21chr1_C_albicans_SC5314	2984302	2984586	L26	SV	INS	heterozygous
Ca21chr2_C_albicans_SC5314	4626	4631	L26	SV	BND	heterozygous
Ca21chr2_C_albicans_SC5314	42062	44328	L26	SV	INS	heterozygous
Ca21chr2_C_albicans_SC5314	70597	77024	L26	SV	INS	heterozygous
Ca21chr2_C_albicans_SC5314	167363	167395	L26	SV	DEL	heterozygous
Ca21chr2_C_albicans_SC5314	189678	189890	L26	SV	INS	heterozygous
Ca21chr2_C_albicans_SC5314	216679	216879	L26	SV	DEL	heterozygous
Ca21chr2_C_albicans_SC5314	328527	328559	L26	SV	DEL	homozygous
Ca21chr2_C_albicans_SC5314	330671	330750	L26	SV	DEL	heterozygous
Ca21chr2_C_albicans_SC5314	353437	353471	L26	SV	DEL	homozygous
Ca21chr2_C_albicans_SC5314	354565	354606	L26	SV	INS	heterozygous
Ca21chr2_C_albicans_SC5314	371998	372032	L26	SV	DEL	heterozygous
Ca21chr2_C_albicans_SC5314	379436	379470	L26	SV	DEL	homozygous
Ca21chr2_C_albicans_SC5314	424834	424887	L26	SV	DEL	heterozygous
Ca21chr2_C_albicans_SC5314	426827	426885	L26	SV	DEL	heterozygous
Ca21chr2_C_albicans_SC5314	428581	428617	L26	SV	INS	heterozygous
Ca21chr2_C_albicans_SC5314	430986	433603	L26	SV	INS	heterozygous
Ca21chr2_C_albicans_SC5314	448526	448775	L26	SV	INS	homozygous
Ca21chr2_C_albicans_SC5314	496363	496613	L26	SV	DEL	heterozygous
Ca21chr2_C_albicans_SC5314	520880	521170	L26	SV	INS	heterozygous
Ca21chr2_C_albicans_SC5314	663079	663250	L26	SV	INS	heterozygous
Ca21chr2_C_albicans_SC5314	671379	671931	L26	SV	DEL	heterozygous
Ca21chr2_C_albicans_SC5314	679450	679734	L26	SV	INS	heterozygous
Ca21chr2_C_albicans_SC5314	712199	718630	L26	SV	INS	homozygous
Ca21chr2_C_albicans_SC5314	734875	735248	L26	SV	DEL	heterozygous
Ca21chr2_C_albicans_SC5314	737648	737698	L26	SV	INS	heterozygous
Ca21chr2_C_albicans_SC5314	738585	739098	L26	SV	INS	heterozygous
Ca21chr2_C_albicans_SC5314	749690	750229	L26	SV	INS	heterozygous
Ca21chr2_C_albicans_SC5314	771048	771087	L26	SV	DEL	homozygous
Ca21chr2_C_albicans_SC5314	771802	772200	L26	SV	INS	heterozygous
Ca21chr2_C_albicans_SC5314	837401	843830	L26	SV	INS	heterozygous
Ca21chr2_C_albicans_SC5314	883311	883420	L26	SV	DEL	heterozygous
Ca21chr2_C_albicans_SC5314	887280	890311	L26	SV	INS	heterozygous
Ca21chr2_C_albicans_SC5314	907007	907044	L26	SV	DEL	homozygous
Ca21chr2_C_albicans_SC5314	922504	928939	L26	SV	INS	heterozygous
Ca21chr2_C_albicans_SC5314	1002762	1002817	L26	SV	DEL	heterozygous
Ca21chr2_C_albicans_SC5314	1008436	1008484	L26	SV	INS	heterozygous
Ca21chr2_C_albicans_SC5314	1012410	1012886	L26	SV	DEL	heterozygous
Ca21chr2_C_albicans_SC5314	1026364	1026871	L26	SV	INS	heterozygous
Ca21chr2_C_albicans_SC5314	1042517	1042615	L26	SV	INS	heterozygous
Ca21chr2_C_albicans_SC5314	1053345	1053391	L26	SV	DEL	heterozygous
Ca21chr2_C_albicans_SC5314	1181564	1181616	L26	SV	INS	homozygous
Ca21chr2_C_albicans_SC5314	1189097	1189414	L26	SV	INS	heterozygous
Ca21chr2_C_albicans_SC5314	1211157	1211190	L26	SV	INS	homozygous
Ca21chr2_C_albicans_SC5314	1363978	1364050	L26	SV	DEL	heterozygous
Ca21chr2_C_albicans_SC5314	1369014	1369492	L26	SV	INS	heterozygous
Ca21chr2_C_albicans_SC5314	1371771	1371810	L26	SV	INS	heterozygous
Ca21chr2_C_albicans_SC5314	1381628	1381665	L26	SV	DEL	heterozygous
Ca21chr2_C_albicans_SC5314	1406423	1406460	L26	SV	DEL	heterozygous
Ca21chr2_C_albicans_SC5314	1416906	1417189	L26	SV	DEL	heterozygous
Ca21chr2_C_albicans_SC5314	1418620	1418669	L26	SV	DEL	heterozygous
Ca21chr2_C_albicans_SC5314	1459308	1459634	L26	SV	DEL	heterozygous
Ca21chr2_C_albicans_SC5314	1557586	1557904	L26	SV	INS	heterozygous
Ca21chr2_C_albicans_SC5314	1675858	1676143	L26	SV	INS	heterozygous
Ca21chr2_C_albicans_SC5314	1684198	1684482	L26	SV	INS	heterozygous
Ca21chr2_C_albicans_SC5314	1742714	1742777	L26	SV	INS	heterozygous
Ca21chr2_C_albicans_SC5314	1750875	1750918	L26	SV	DEL	heterozygous
Ca21chr2_C_albicans_SC5314	1755501	1755720	L26	SV	DEL	heterozygous
Ca21chr2_C_albicans_SC5314	1770613	1770646	L26	SV	INS	homozygous
Ca21chr2_C_albicans_SC5314	1781926	1782034	L26	SV	INS	heterozygous
Ca21chr2_C_albicans_SC5314	1801426	1801543	L26	SV	INS	heterozygous
Ca21chr2_C_albicans_SC5314	1826576	1826900	L26	SV	DEL	homozygous
Ca21chr2_C_albicans_SC5314	1867806	1868062	L26	SV	INS	heterozygous
Ca21chr2_C_albicans_SC5314	1886920	1887314	L26	SV	DEL	heterozygous
Ca21chr2_C_albicans_SC5314	1915431	1917239	L26	SV	INS	heterozygous
Ca21chr2_C_albicans_SC5314	1932952	1932989	L26	SV	DEL	heterozygous
Ca21chr2_C_albicans_SC5314	1951765	1952322	L26	SV	INS	homozygous
Ca21chr2_C_albicans_SC5314	1952348	1952408	L26	SV	INS	homozygous
Ca21chr2_C_albicans_SC5314	1952718	1952789	L26	SV	INS	heterozygous
Ca21chr2_C_albicans_SC5314	1982620	1982653	L26	SV	DEL	heterozygous
Ca21chr2_C_albicans_SC5314	2083224	2083404	L26	SV	INS	heterozygous
Ca21chr2_C_albicans_SC5314	2086422	2086486	L26	SV	INS	heterozygous
Ca21chr2_C_albicans_SC5314	2148943	2149116	L26	SV	INS	heterozygous
Ca21chr2_C_albicans_SC5314	2169093	2169363	L26	SV	DEL	heterozygous
Ca21chr2_C_albicans_SC5314	2227944	2228429	L26	SV	DEL	homozygous
Ca21chr3_C_albicans_SC5314	2648	2889	L26	SV	INS	heterozygous
Ca21chr3_C_albicans_SC5314	3278	3462	L26	SV	INS	homozygous
Ca21chr3_C_albicans_SC5314	3513	10219	L26	SV	DUP	homozygous
Ca21chr3_C_albicans_SC5314	10437	1791308	L26	SV	INV	homozygous
Ca21chr3_C_albicans_SC5314	27375	27544	L26	SV	INS	heterozygous
Ca21chr3_C_albicans_SC5314	208085	208119	L26	SV	INS	heterozygous
Ca21chr3_C_albicans_SC5314	230981	231024	L26	SV	INS	homozygous
Ca21chr3_C_albicans_SC5314	234671	234877	L26	SV	DEL	homozygous
Ca21chr3_C_albicans_SC5314	270630	271104	L26	SV	INS	heterozygous
Ca21chr3_C_albicans_SC5314	307943	307978	L26	SV	DEL	homozygous
Ca21chr3_C_albicans_SC5314	315971	316064	L26	SV	INS	heterozygous
Ca21chr3_C_albicans_SC5314	367101	367141	L26	SV	INS	heterozygous
Ca21chr3_C_albicans_SC5314	378834	385264	L26	SV	INS	heterozygous
Ca21chr3_C_albicans_SC5314	478237	478405	L26	SV	DEL	heterozygous
Ca21chr3_C_albicans_SC5314	524650	524699	L26	SV	DEL	heterozygous
Ca21chr3_C_albicans_SC5314	528995	535425	L26	SV	INS	homozygous
Ca21chr3_C_albicans_SC5314	566734	566818	L26	SV	INS	heterozygous
Ca21chr3_C_albicans_SC5314	574643	574790	L26	SV	INS	heterozygous
Ca21chr3_C_albicans_SC5314	597222	597460	L26	SV	DEL	heterozygous
Ca21chr3_C_albicans_SC5314	601114	601590	L26	SV	INS	heterozygous
Ca21chr3_C_albicans_SC5314	644866	645037	L26	SV	INS	heterozygous
Ca21chr3_C_albicans_SC5314	645741	645915	L26	SV	INS	heterozygous
Ca21chr3_C_albicans_SC5314	684056	684267	L26	SV	INS	heterozygous
Ca21chr3_C_albicans_SC5314	703166	703562	L26	SV	INS	heterozygous
Ca21chr3_C_albicans_SC5314	856436	858593	L26	SV	INS	heterozygous
Ca21chr3_C_albicans_SC5314	892833	892992	L26	SV	INS	heterozygous
Ca21chr3_C_albicans_SC5314	962936	962970	L26	SV	DEL	heterozygous
Ca21chr3_C_albicans_SC5314	982099	982295	L26	SV	INS	heterozygous
Ca21chr3_C_albicans_SC5314	1116365	1116428	L26	SV	DEL	heterozygous
Ca21chr3_C_albicans_SC5314	1129592	1134857	L26	SV	INS	heterozygous
Ca21chr3_C_albicans_SC5314	1143973	1150406	L26	SV	INS	heterozygous
Ca21chr3_C_albicans_SC5314	1157980	1158305	L26	SV	DEL	heterozygous
Ca21chr3_C_albicans_SC5314	1207643	1207697	L26	SV	INS	heterozygous
Ca21chr3_C_albicans_SC5314	1211328	1211574	L26	SV	INS	heterozygous
Ca21chr3_C_albicans_SC5314	1212310	1212344	L26	SV	DEL	homozygous
Ca21chr3_C_albicans_SC5314	1218216	1218279	L26	SV	INS	homozygous
Ca21chr3_C_albicans_SC5314	1219682	1219818	L26	SV	DEL	homozygous
Ca21chr3_C_albicans_SC5314	1226482	1226514	L26	SV	DEL	homozygous
Ca21chr3_C_albicans_SC5314	1234882	1234920	L26	SV	INS	heterozygous
Ca21chr3_C_albicans_SC5314	1273018	1273232	L26	SV	DEL	heterozygous
Ca21chr3_C_albicans_SC5314	1280772	1280848	L26	SV	INS	homozygous
Ca21chr3_C_albicans_SC5314	1283639	1283689	L26	SV	INS	heterozygous
Ca21chr3_C_albicans_SC5314	1289124	1289160	L26	SV	DEL	heterozygous
Ca21chr3_C_albicans_SC5314	1320745	1320788	L26	SV	INS	homozygous
Ca21chr3_C_albicans_SC5314	1329859	1329907	L26	SV	INS	heterozygous
Ca21chr3_C_albicans_SC5314	1404160	1405355	L26	SV	INS	homozygous
Ca21chr3_C_albicans_SC5314	1449361	1449632	L26	SV	DEL	heterozygous
Ca21chr3_C_albicans_SC5314	1482986	1489421	L26	SV	INS	heterozygous
Ca21chr3_C_albicans_SC5314	1548260	1548737	L26	SV	INS	homozygous
Ca21chr3_C_albicans_SC5314	1628090	1634514	L26	SV	INS	heterozygous
Ca21chr3_C_albicans_SC5314	1788668	1788926	L26	SV	DEL	homozygous
Ca21chr4_C_albicans_SC5314	553	790	L26	SV	INS	homozygous
Ca21chr4_C_albicans_SC5314	1300	1375	L26	SV	INS	homozygous
Ca21chr4_C_albicans_SC5314	73809	80237	L26	SV	INS	homozygous
Ca21chr4_C_albicans_SC5314	164278	166605	L26	SV	INS	homozygous
Ca21chr4_C_albicans_SC5314	204407	204506	L26	SV	INS	homozygous
Ca21chr4_C_albicans_SC5314	207558	207811	L26	SV	DEL	homozygous
Ca21chr4_C_albicans_SC5314	209233	209274	L26	SV	INS	homozygous
Ca21chr4_C_albicans_SC5314	254547	254605	L26	SV	DEL	homozygous
Ca21chr4_C_albicans_SC5314	266294	266384	L26	SV	INS	homozygous
Ca21chr4_C_albicans_SC5314	278211	278246	L26	SV	INS	homozygous
Ca21chr4_C_albicans_SC5314	297369	297412	L26	SV	DEL	homozygous
Ca21chr4_C_albicans_SC5314	321721	322038	L26	SV	INS	homozygous
Ca21chr4_C_albicans_SC5314	374177	374457	L26	SV	INS	homozygous
Ca21chr4_C_albicans_SC5314	511029	511067	L26	SV	DEL	heterozygous
Ca21chr4_C_albicans_SC5314	526740	526794	L26	SV	INS	heterozygous
Ca21chr4_C_albicans_SC5314	527368	527448	L26	SV	DEL	heterozygous
Ca21chr4_C_albicans_SC5314	562482	562734	L26	SV	INS	heterozygous
Ca21chr4_C_albicans_SC5314	585843	586329	L26	SV	DEL	homozygous
Ca21chr4_C_albicans_SC5314	637131	637645	L26	SV	DEL	heterozygous
Ca21chr4_C_albicans_SC5314	673946	680848	L26	SV	DEL	homozygous
Ca21chr4_C_albicans_SC5314	729494	729567	L26	SV	INS	heterozygous
Ca21chr4_C_albicans_SC5314	745631	745718	L26	SV	INS	heterozygous
Ca21chr4_C_albicans_SC5314	746010	746125	L26	SV	INS	heterozygous
Ca21chr4_C_albicans_SC5314	763336	763369	L26	SV	DEL	heterozygous
Ca21chr4_C_albicans_SC5314	1006818	1006912	L26	SV	DEL	heterozygous
Ca21chr4_C_albicans_SC5314	1134737	1134801	L26	SV	DEL	homozygous
Ca21chr4_C_albicans_SC5314	1165356	1171785	L26	SV	INS	heterozygous
Ca21chr4_C_albicans_SC5314	1178664	1179179	L26	SV	DEL	homozygous
Ca21chr4_C_albicans_SC5314	1193917	1194119	L26	SV	DEL	heterozygous
Ca21chr4_C_albicans_SC5314	1195339	1195729	L26	SV	INS	heterozygous
Ca21chr4_C_albicans_SC5314	1201739	1201912	L26	SV	DEL	heterozygous
Ca21chr4_C_albicans_SC5314	1201739	1202256	L26	SV	DEL	heterozygous
Ca21chr4_C_albicans_SC5314	1201995	1202340	L26	SV	DEL	heterozygous
Ca21chr4_C_albicans_SC5314	1262679	1262876	L26	SV	DEL	heterozygous
Ca21chr4_C_albicans_SC5314	1296749	1296786	L26	SV	DEL	heterozygous
Ca21chr4_C_albicans_SC5314	1315467	1315845	L26	SV	DEL	heterozygous
Ca21chr4_C_albicans_SC5314	1443898	1443952	L26	SV	DEL	homozygous
Ca21chr4_C_albicans_SC5314	1443898	1443982	L26	SV	DEL	homozygous
Ca21chr4_C_albicans_SC5314	1449443	1449471	L26	SV	INS	homozygous
Ca21chr4_C_albicans_SC5314	1484338	1490766	L26	SV	INS	heterozygous
Ca21chr4_C_albicans_SC5314	1486952	1488777	L26	SV	DEL	heterozygous
Ca21chr4_C_albicans_SC5314	1503561	1503636	L26	SV	DEL	heterozygous
Ca21chr4_C_albicans_SC5314	1566724	1567131	L26	SV	INS	heterozygous
Ca21chr5_C_albicans_SC5314	117971	118250	L26	SV	INS	heterozygous
Ca21chr5_C_albicans_SC5314	121090	121413	L26	SV	INS	heterozygous
Ca21chr5_C_albicans_SC5314	164286	164329	L26	SV	DEL	heterozygous
Ca21chr5_C_albicans_SC5314	172461	172624	L26	SV	DEL	homozygous
Ca21chr5_C_albicans_SC5314	173165	173409	L26	SV	DEL	homozygous
Ca21chr5_C_albicans_SC5314	198478	198871	L26	SV	INS	heterozygous
Ca21chr5_C_albicans_SC5314	286654	286959	L26	SV	INS	heterozygous
Ca21chr5_C_albicans_SC5314	306613	306866	L26	SV	DEL	heterozygous
Ca21chr5_C_albicans_SC5314	337041	343473	L26	SV	INS	heterozygous
Ca21chr5_C_albicans_SC5314	345109	345145	L26	SV	INS	heterozygous
Ca21chr5_C_albicans_SC5314	369229	369318	L26	SV	DEL	heterozygous
Ca21chr5_C_albicans_SC5314	466127	466648	L26	SV	INS	heterozygous
Ca21chr5_C_albicans_SC5314	500704	501180	L26	SV	DEL	heterozygous
Ca21chr5_C_albicans_SC5314	534803	535124	L26	SV	DEL	heterozygous
Ca21chr5_C_albicans_SC5314	562568	563111	L26	SV	INS	heterozygous
Ca21chr5_C_albicans_SC5314	579439	579473	L26	SV	DEL	heterozygous
Ca21chr5_C_albicans_SC5314	610967	611444	L26	SV	INS	heterozygous
Ca21chr5_C_albicans_SC5314	673143	674111	L26	SV	INS	homozygous
Ca21chr5_C_albicans_SC5314	676694	676721	L26	SV	INS	heterozygous
Ca21chr5_C_albicans_SC5314	676867	676960	L26	SV	INS	heterozygous
Ca21chr5_C_albicans_SC5314	747031	747154	L26	SV	INS	heterozygous
Ca21chr5_C_albicans_SC5314	802986	809419	L26	SV	INS	heterozygous
Ca21chr5_C_albicans_SC5314	869064	869100	L26	SV	INS	heterozygous
Ca21chr5_C_albicans_SC5314	871225	871258	L26	SV	DEL	heterozygous
Ca21chr5_C_albicans_SC5314	886231	886518	L26	SV	INS	heterozygous
Ca21chr5_C_albicans_SC5314	965670	965742	L26	SV	INS	heterozygous
Ca21chr5_C_albicans_SC5314	1047672	1050415	L26	SV	INS	heterozygous
Ca21chr5_C_albicans_SC5314	1092892	1092930	L26	SV	INS	heterozygous
Ca21chr5_C_albicans_SC5314	1171753	1172006	L26	SV	DEL	heterozygous
Ca21chr6_C_albicans_SC5314	501	506	L26	SV	BND	heterozygous
Ca21chr6_C_albicans_SC5314	5923	5928	L26	SV	BND	heterozygous
Ca21chr6_C_albicans_SC5314	9418	9449	L26	SV	DEL	heterozygous
Ca21chr6_C_albicans_SC5314	22007	22058	L26	SV	DEL	homozygous
Ca21chr6_C_albicans_SC5314	79190	79242	L26	SV	DEL	homozygous
Ca21chr6_C_albicans_SC5314	121700	121752	L26	SV	DEL	homozygous
Ca21chr6_C_albicans_SC5314	162575	162627	L26	SV	DEL	homozygous
Ca21chr6_C_albicans_SC5314	209275	209312	L26	SV	DEL	homozygous
Ca21chr6_C_albicans_SC5314	240357	245425	L26	SV	DEL	homozygous
Ca21chr6_C_albicans_SC5314	260442	260493	L26	SV	DEL	homozygous
Ca21chr6_C_albicans_SC5314	322853	322892	L26	SV	INS	homozygous
Ca21chr6_C_albicans_SC5314	396328	396380	L26	SV	DEL	homozygous
Ca21chr6_C_albicans_SC5314	416500	416552	L26	SV	DEL	homozygous
Ca21chr6_C_albicans_SC5314	445176	445228	L26	SV	DEL	homozygous
Ca21chr6_C_albicans_SC5314	477923	477981	L26	SV	DEL	homozygous
Ca21chr6_C_albicans_SC5314	505457	505509	L26	SV	DEL	homozygous
Ca21chr6_C_albicans_SC5314	720199	720251	L26	SV	DEL	homozygous
Ca21chr6_C_albicans_SC5314	752393	752868	L26	SV	INS	homozygous
Ca21chr6_C_albicans_SC5314	780457	781147	L26	SV	DEL	homozygous
Ca21chr6_C_albicans_SC5314	780461	780466	L26	SV	BND	heterozygous
Ca21chr6_C_albicans_SC5314	781144	781149	L26	SV	BND	heterozygous
Ca21chr6_C_albicans_SC5314	792947	793487	L26	SV	INS	homozygous
Ca21chr6_C_albicans_SC5314	799919	801216	L26	SV	DEL	homozygous
Ca21chr6_C_albicans_SC5314	802485	802601	L26	SV	INS	homozygous
Ca21chr6_C_albicans_SC5314	867350	867694	L26	SV	DEL	heterozygous
Ca21chr6_C_albicans_SC5314	874039	874430	L26	SV	DEL	homozygous
Ca21chr6_C_albicans_SC5314	877196	877248	L26	SV	DEL	homozygous
Ca21chr6_C_albicans_SC5314	888654	889168	L26	SV	DEL	heterozygous
Ca21chr6_C_albicans_SC5314	896048	896100	L26	SV	DEL	homozygous
Ca21chr6_C_albicans_SC5314	900217	900434	L26	SV	DEL	heterozygous
Ca21chr6_C_albicans_SC5314	901233	901341	L26	SV	INS	homozygous
Ca21chr6_C_albicans_SC5314	901527	902608	L26	SV	DEL	heterozygous
Ca21chr6_C_albicans_SC5314	901965	902073	L26	SV	INS	heterozygous
Ca21chr6_C_albicans_SC5314	902601	902818	L26	SV	DEL	homozygous
Ca21chr6_C_albicans_SC5314	902994	903211	L26	SV	DEL	heterozygous
Ca21chr6_C_albicans_SC5314	903477	903586	L26	SV	DEL	heterozygous
Ca21chr6_C_albicans_SC5314	913730	913782	L26	SV	DEL	homozygous
Ca21chr6_C_albicans_SC5314	920642	920717	L26	SV	INS	heterozygous
Ca21chr6_C_albicans_SC5314	923559	923624	L26	SV	DEL	heterozygous
Ca21chr6_C_albicans_SC5314	924137	924293	L26	SV	INS	heterozygous
Ca21chr6_C_albicans_SC5314	924535	924571	L26	SV	INS	heterozygous
Ca21chr6_C_albicans_SC5314	924773	924826	L26	SV	DEL	homozygous
Ca21chr6_C_albicans_SC5314	953204	953244	L26	SV	INS	heterozygous
Ca21chr6_C_albicans_SC5314	963846	970277	L26	SV	INS	heterozygous
Ca21chr6_C_albicans_SC5314	972806	972914	L26	SV	INS	heterozygous
Ca21chr6_C_albicans_SC5314	972827	973368	L26	SV	DEL	heterozygous
Ca21chr6_C_albicans_SC5314	975031	975571	L26	SV	DEL	homozygous
Ca21chr6_C_albicans_SC5314	976441	977413	L26	SV	DEL	heterozygous
Ca21chr6_C_albicans_SC5314	979776	979828	L26	SV	DEL	homozygous
Ca21chr6_C_albicans_SC5314	987105	990497	L26	SV	INS	homozygous
Ca21chr7_C_albicans_SC5314	11176	11733	L26	SV	INS	heterozygous
Ca21chr7_C_albicans_SC5314	12078	12652	L26	SV	DEL	heterozygous
Ca21chr7_C_albicans_SC5314	12531	12956	L26	SV	INS	homozygous
Ca21chr7_C_albicans_SC5314	38389	44822	L26	SV	INS	heterozygous
Ca21chr7_C_albicans_SC5314	38390	560341	L26	SV	DUP	heterozygous
Ca21chr7_C_albicans_SC5314	38394	553921	L26	SV	DEL	heterozygous
Ca21chr7_C_albicans_SC5314	88270	88598	L26	SV	DEL	heterozygous
Ca21chr7_C_albicans_SC5314	109662	111832	L26	SV	DEL	heterozygous
Ca21chr7_C_albicans_SC5314	109671	694960	L26	SV	DUP	homozygous
Ca21chr7_C_albicans_SC5314	109672	109677	L26	SV	BND	homozygous
Ca21chr7_C_albicans_SC5314	109672	109677	L26	SV	BND	homozygous
Ca21chr7_C_albicans_SC5314	111831	111836	L26	SV	BND	homozygous
Ca21chr7_C_albicans_SC5314	111831	694953	L26	SV	DEL	homozygous
Ca21chr7_C_albicans_SC5314	111835	111840	L26	SV	BND	homozygous
Ca21chr7_C_albicans_SC5314	116130	116196	L26	SV	INS	heterozygous
Ca21chr7_C_albicans_SC5314	121187	121323	L26	SV	DEL	heterozygous
Ca21chr7_C_albicans_SC5314	168967	169045	L26	SV	INS	homozygous
Ca21chr7_C_albicans_SC5314	176325	176372	L26	SV	DEL	homozygous
Ca21chr7_C_albicans_SC5314	228257	228294	L26	SV	DEL	heterozygous
Ca21chr7_C_albicans_SC5314	234895	235067	L26	SV	INS	heterozygous
Ca21chr7_C_albicans_SC5314	244070	250503	L26	SV	INS	heterozygous
Ca21chr7_C_albicans_SC5314	244071	553921	L26	SV	INV	heterozygous
Ca21chr7_C_albicans_SC5314	244075	560341	L26	SV	INV	heterozygous
Ca21chr7_C_albicans_SC5314	247451	247983	L26	SV	INS	heterozygous
Ca21chr7_C_albicans_SC5314	256944	257320	L26	SV	DEL	heterozygous
Ca21chr7_C_albicans_SC5314	281166	281209	L26	SV	DEL	heterozygous
Ca21chr7_C_albicans_SC5314	295426	295468	L26	SV	INS	heterozygous
Ca21chr7_C_albicans_SC5314	336078	336114	L26	SV	DEL	homozygous
Ca21chr7_C_albicans_SC5314	366233	366273	L26	SV	DEL	homozygous
Ca21chr7_C_albicans_SC5314	379325	379363	L26	SV	INS	heterozygous
Ca21chr7_C_albicans_SC5314	483316	483352	L26	SV	INS	homozygous
Ca21chr7_C_albicans_SC5314	505409	505456	L26	SV	INS	homozygous
Ca21chr7_C_albicans_SC5314	521430	528930	L26	SV	DEL	heterozygous
Ca21chr7_C_albicans_SC5314	553912	560339	L26	SV	DEL	homozygous
Ca21chr7_C_albicans_SC5314	553918	553923	L26	SV	BND	heterozygous
Ca21chr7_C_albicans_SC5314	553920	553925	L26	SV	BND	heterozygous
Ca21chr7_C_albicans_SC5314	553920	553925	L26	SV	BND	heterozygous
Ca21chr7_C_albicans_SC5314	553921	553926	L26	SV	BND	heterozygous
Ca21chr7_C_albicans_SC5314	553921	553926	L26	SV	BND	heterozygous
Ca21chr7_C_albicans_SC5314	553921	553926	L26	SV	BND	heterozygous
Ca21chr7_C_albicans_SC5314	553921	553926	L26	SV	BND	heterozygous
Ca21chr7_C_albicans_SC5314	553921	553926	L26	SV	BND	homozygous
Ca21chr7_C_albicans_SC5314	553921	553926	L26	SV	BND	heterozygous
Ca21chr7_C_albicans_SC5314	553921	553926	L26	SV	BND	heterozygous
Ca21chr7_C_albicans_SC5314	553921	553926	L26	SV	BND	heterozygous
Ca21chr7_C_albicans_SC5314	553921	553926	L26	SV	BND	heterozygous
Ca21chr7_C_albicans_SC5314	553921	553926	L26	SV	BND	heterozygous
Ca21chr7_C_albicans_SC5314	553921	553926	L26	SV	BND	homozygous
Ca21chr7_C_albicans_SC5314	553921	553926	L26	SV	BND	homozygous
Ca21chr7_C_albicans_SC5314	553921	553926	L26	SV	BND	heterozygous
Ca21chr7_C_albicans_SC5314	553921	553926	L26	SV	BND	heterozygous
Ca21chr7_C_albicans_SC5314	553921	553926	L26	SV	BND	heterozygous
Ca21chr7_C_albicans_SC5314	553921	553926	L26	SV	BND	heterozygous
Ca21chr7_C_albicans_SC5314	553921	749109	L26	SV	DUP	heterozygous
Ca21chr7_C_albicans_SC5314	553922	553927	L26	SV	BND	homozygous
Ca21chr7_C_albicans_SC5314	553922	553927	L26	SV	BND	heterozygous
Ca21chr7_C_albicans_SC5314	557799	557861	L26	SV	INS	homozygous
Ca21chr7_C_albicans_SC5314	560340	560345	L26	SV	BND	heterozygous
Ca21chr7_C_albicans_SC5314	560340	560345	L26	SV	BND	heterozygous
Ca21chr7_C_albicans_SC5314	560340	560345	L26	SV	BND	heterozygous
Ca21chr7_C_albicans_SC5314	560340	560345	L26	SV	BND	heterozygous
Ca21chr7_C_albicans_SC5314	560340	560345	L26	SV	BND	homozygous
Ca21chr7_C_albicans_SC5314	560340	560345	L26	SV	BND	heterozygous
Ca21chr7_C_albicans_SC5314	560340	560345	L26	SV	BND	homozygous
Ca21chr7_C_albicans_SC5314	560340	560345	L26	SV	BND	heterozygous
Ca21chr7_C_albicans_SC5314	560340	560345	L26	SV	BND	heterozygous
Ca21chr7_C_albicans_SC5314	560341	560346	L26	SV	BND	heterozygous
Ca21chr7_C_albicans_SC5314	560341	560346	L26	SV	BND	homozygous
Ca21chr7_C_albicans_SC5314	560341	560346	L26	SV	BND	heterozygous
Ca21chr7_C_albicans_SC5314	560341	560346	L26	SV	BND	heterozygous
Ca21chr7_C_albicans_SC5314	560341	560346	L26	SV	BND	heterozygous
Ca21chr7_C_albicans_SC5314	560341	560346	L26	SV	BND	heterozygous
Ca21chr7_C_albicans_SC5314	560341	560346	L26	SV	BND	heterozygous
Ca21chr7_C_albicans_SC5314	560341	560346	L26	SV	BND	heterozygous
Ca21chr7_C_albicans_SC5314	560341	560346	L26	SV	BND	homozygous
Ca21chr7_C_albicans_SC5314	560341	560346	L26	SV	BND	heterozygous
Ca21chr7_C_albicans_SC5314	560341	560346	L26	SV	BND	heterozygous
Ca21chr7_C_albicans_SC5314	560341	560346	L26	SV	BND	heterozygous
Ca21chr7_C_albicans_SC5314	560341	749105	L26	SV	DEL	heterozygous
Ca21chr7_C_albicans_SC5314	575466	575529	L26	SV	DEL	heterozygous
Ca21chr7_C_albicans_SC5314	582503	582676	L26	SV	DEL	homozygous
Ca21chr7_C_albicans_SC5314	582773	582945	L26	SV	DEL	heterozygous
Ca21chr7_C_albicans_SC5314	589559	589619	L26	SV	INS	heterozygous
Ca21chr7_C_albicans_SC5314	601769	601945	L26	SV	DEL	heterozygous
Ca21chr7_C_albicans_SC5314	639197	639674	L26	SV	INS	heterozygous
Ca21chr7_C_albicans_SC5314	694952	697125	L26	SV	INS	heterozygous
Ca21chr7_C_albicans_SC5314	744167	750600	L26	SV	INS	heterozygous
Ca21chr7_C_albicans_SC5314	749104	755528	L26	SV	INS	heterozygous
Ca21chr7_C_albicans_SC5314	820520	821786	L26	SV	INS	homozygous
Ca21chr7_C_albicans_SC5314	833596	833645	L26	SV	DEL	homozygous
Ca21chr7_C_albicans_SC5314	835119	835918	L26	SV	DEL	homozygous
Ca21chr7_C_albicans_SC5314	836697	836737	L26	SV	DEL	homozygous
Ca21chr7_C_albicans_SC5314	838341	838377	L26	SV	INS	homozygous
Ca21chr7_C_albicans_SC5314	838900	838937	L26	SV	DEL	homozygous
Ca21chr7_C_albicans_SC5314	910770	911326	L26	SV	INS	homozygous
Ca21chr7_C_albicans_SC5314	946014	946047	L26	SV	INS	homozygous
Ca21chrR_C_albicans_SC5314	1455	1494	L26	SV	INS	homozygous
Ca21chrR_C_albicans_SC5314	11036	11222	L26	SV	INS	homozygous
Ca21chrR_C_albicans_SC5314	11638	11733	L26	SV	INS	homozygous
Ca21chrR_C_albicans_SC5314	19367	19403	L26	SV	INS	homozygous
Ca21chrR_C_albicans_SC5314	207664	207706	L26	SV	INS	homozygous
Ca21chrR_C_albicans_SC5314	210580	215732	L26	SV	DEL	homozygous
Ca21chrR_C_albicans_SC5314	210586	210591	L26	SV	BND	heterozygous
Ca21chrR_C_albicans_SC5314	215731	215736	L26	SV	BND	heterozygous
Ca21chrR_C_albicans_SC5314	306605	306642	L26	SV	DEL	homozygous
Ca21chrR_C_albicans_SC5314	498252	498538	L26	SV	INS	homozygous
Ca21chrR_C_albicans_SC5314	543045	549574	L26	SV	INS	homozygous
Ca21chrR_C_albicans_SC5314	543046	543051	L26	SV	BND	homozygous
Ca21chrR_C_albicans_SC5314	543050	543055	L26	SV	BND	homozygous
Ca21chrR_C_albicans_SC5314	651677	651725	L26	SV	DEL	homozygous
Ca21chrR_C_albicans_SC5314	664160	670592	L26	SV	INS	homozygous
Ca21chrR_C_albicans_SC5314	664161	664166	L26	SV	BND	homozygous
Ca21chrR_C_albicans_SC5314	664165	664170	L26	SV	BND	homozygous
Ca21chrR_C_albicans_SC5314	748340	754770	L26	SV	INS	homozygous
Ca21chrR_C_albicans_SC5314	748341	748346	L26	SV	BND	homozygous
Ca21chrR_C_albicans_SC5314	748346	748351	L26	SV	BND	homozygous
Ca21chrR_C_albicans_SC5314	958421	958896	L26	SV	INS	homozygous
Ca21chrR_C_albicans_SC5314	961458	961852	L26	SV	DEL	homozygous
Ca21chrR_C_albicans_SC5314	1051314	1051386	L26	SV	INS	homozygous
Ca21chrR_C_albicans_SC5314	1129043	1134797	L26	SV	DEL	homozygous
Ca21chrR_C_albicans_SC5314	1229730	1230267	L26	SV	INS	homozygous
Ca21chrR_C_albicans_SC5314	1232247	1238945	L26	SV	INS	homozygous
Ca21chrR_C_albicans_SC5314	1353190	1353364	L26	SV	INS	heterozygous
Ca21chrR_C_albicans_SC5314	1359801	1360191	L26	SV	INS	homozygous
Ca21chrR_C_albicans_SC5314	1439759	1446193	L26	SV	INS	homozygous
Ca21chrR_C_albicans_SC5314	1439760	1439765	L26	SV	BND	homozygous
Ca21chrR_C_albicans_SC5314	1439764	1439769	L26	SV	BND	homozygous
Ca21chrR_C_albicans_SC5314	1479833	1479909	L26	SV	DEL	heterozygous
Ca21chrR_C_albicans_SC5314	1487195	1487200	L26	SV	BND	heterozygous
Ca21chrR_C_albicans_SC5314	1487202	1493644	L26	SV	INS	heterozygous
Ca21chrR_C_albicans_SC5314	1533368	1533583	L26	SV	DEL	heterozygous
Ca21chrR_C_albicans_SC5314	1585327	1585644	L26	SV	DEL	heterozygous
Ca21chrR_C_albicans_SC5314	1611180	1611717	L26	SV	DEL	heterozygous
Ca21chrR_C_albicans_SC5314	1647591	1647627	L26	SV	INS	heterozygous
Ca21chrR_C_albicans_SC5314	1699658	1706099	L26	SV	INS	heterozygous
Ca21chrR_C_albicans_SC5314	1699660	1699665	L26	SV	BND	heterozygous
Ca21chrR_C_albicans_SC5314	1699664	1699669	L26	SV	BND	heterozygous
Ca21chrR_C_albicans_SC5314	1711659	1711689	L26	SV	DEL	homozygous
Ca21chrR_C_albicans_SC5314	1760123	1760515	L26	SV	INS	heterozygous
Ca21chrR_C_albicans_SC5314	1770390	1776827	L26	SV	INS	heterozygous
Ca21chrR_C_albicans_SC5314	1770391	1770396	L26	SV	BND	heterozygous
Ca21chrR_C_albicans_SC5314	1770395	1770400	L26	SV	BND	heterozygous
Ca21chrR_C_albicans_SC5314	1813350	1813937	L26	SV	INS	homozygous
Ca21chrR_C_albicans_SC5314	1883316	1883835	L26	SV	INS	heterozygous
Ca21chrR_C_albicans_SC5314	1884334	1888186	L26	SV	DEL	homozygous
Ca21chrR_C_albicans_SC5314	1885077	1885140	L26	SV	INS	homozygous
Ca21chrR_C_albicans_SC5314	1886430	1886446	L26	SV	INS	homozygous
Ca21chrR_C_albicans_SC5314	1886744	1886780	L26	SV	INS	homozygous
Ca21chrR_C_albicans_SC5314	1887326	1887607	L26	SV	DEL	homozygous
Ca21chrR_C_albicans_SC5314	1888292	1888342	L26	SV	INS	homozygous
Ca21chrR_C_albicans_SC5314	1889148	1889223	L26	SV	INS	homozygous
Ca21chrR_C_albicans_SC5314	1889513	1897750	L26	SV	DEL	homozygous
Ca21chrR_C_albicans_SC5314	1889622	1889665	L26	SV	INS	homozygous
Ca21chrR_C_albicans_SC5314	1890561	1890659	L26	SV	INS	homozygous
Ca21chrR_C_albicans_SC5314	1890875	1890968	L26	SV	INS	homozygous
Ca21chrR_C_albicans_SC5314	1891077	1891096	L26	SV	INS	homozygous
Ca21chrR_C_albicans_SC5314	1891347	1891423	L26	SV	INS	homozygous
Ca21chrR_C_albicans_SC5314	1891713	1891770	L26	SV	INS	homozygous
Ca21chrR_C_albicans_SC5314	1891855	1891994	L26	SV	INS	homozygous
Ca21chrR_C_albicans_SC5314	1892084	1892173	L26	SV	INS	homozygous
Ca21chrR_C_albicans_SC5314	1892652	1892724	L26	SV	INS	homozygous
Ca21chrR_C_albicans_SC5314	1895766	1895797	L26	SV	INS	homozygous
Ca21chrR_C_albicans_SC5314	1896505	1896642	L26	SV	INS	homozygous
Ca21chrR_C_albicans_SC5314	1896889	1896950	L26	SV	INS	homozygous
Ca21chrR_C_albicans_SC5314	1897646	1901875	L26	SV	INS	homozygous
Ca21chrR_C_albicans_SC5314	2019332	2019386	L26	SV	INS	homozygous
Ca21chrR_C_albicans_SC5314	2034418	2034472	L26	SV	INS	heterozygous
Ca21chrR_C_albicans_SC5314	2047056	2047093	L26	SV	INS	homozygous
Ca21chrR_C_albicans_SC5314	2231993	2238419	L26	SV	INS	homozygous
Ca21chrR_C_albicans_SC5314	2231994	2231999	L26	SV	BND	homozygous
Ca21chrR_C_albicans_SC5314	2231998	2232003	L26	SV	BND	homozygous
Ca21chr1_C_albicans_SC5314	6856	6966	P75063	SV	DEL	homozygous
Ca21chr1_C_albicans_SC5314	10268	10525	P75063	SV	INS	homozygous
Ca21chr1_C_albicans_SC5314	11101	11117	P75063	SV	DEL	heterozygous
Ca21chr1_C_albicans_SC5314	42180	46167	P75063	SV	DEL	homozygous
Ca21chr1_C_albicans_SC5314	141345	141386	P75063	SV	DEL	homozygous
Ca21chr1_C_albicans_SC5314	151118	151148	P75063	SV	INS	homozygous
Ca21chr1_C_albicans_SC5314	151522	151552	P75063	SV	INS	homozygous
Ca21chr1_C_albicans_SC5314	155404	155436	P75063	SV	DEL	heterozygous
Ca21chr1_C_albicans_SC5314	236003	236515	P75063	SV	INS	heterozygous
Ca21chr1_C_albicans_SC5314	277085	277402	P75063	SV	DEL	homozygous
Ca21chr1_C_albicans_SC5314	280126	280328	P75063	SV	DEL	heterozygous
Ca21chr1_C_albicans_SC5314	295688	295728	P75063	SV	INS	homozygous
Ca21chr1_C_albicans_SC5314	324673	324924	P75063	SV	INS	heterozygous
Ca21chr1_C_albicans_SC5314	336236	336640	P75063	SV	INS	heterozygous
Ca21chr1_C_albicans_SC5314	337521	337555	P75063	SV	DEL	homozygous
Ca21chr1_C_albicans_SC5314	359609	359858	P75063	SV	INS	heterozygous
Ca21chr1_C_albicans_SC5314	371893	371951	P75063	SV	INS	homozygous
Ca21chr1_C_albicans_SC5314	379779	386467	P75063	SV	INS	heterozygous
Ca21chr1_C_albicans_SC5314	403868	404262	P75063	SV	DEL	homozygous
Ca21chr1_C_albicans_SC5314	448934	448966	P75063	SV	DEL	homozygous
Ca21chr1_C_albicans_SC5314	464835	464881	P75063	SV	DEL	homozygous
Ca21chr1_C_albicans_SC5314	474076	474111	P75063	SV	INS	heterozygous
Ca21chr1_C_albicans_SC5314	478564	478881	P75063	SV	INS	heterozygous
Ca21chr1_C_albicans_SC5314	493595	493627	P75063	SV	DEL	heterozygous
Ca21chr1_C_albicans_SC5314	536670	537069	P75063	SV	DEL	homozygous
Ca21chr1_C_albicans_SC5314	584808	584874	P75063	SV	DEL	heterozygous
Ca21chr1_C_albicans_SC5314	626337	626414	P75063	SV	DEL	heterozygous
Ca21chr1_C_albicans_SC5314	641835	641902	P75063	SV	DEL	homozygous
Ca21chr1_C_albicans_SC5314	648803	648860	P75063	SV	INS	heterozygous
Ca21chr1_C_albicans_SC5314	690310	690700	P75063	SV	INS	heterozygous
Ca21chr1_C_albicans_SC5314	825362	825463	P75063	SV	INS	heterozygous
Ca21chr1_C_albicans_SC5314	826188	826224	P75063	SV	INS	heterozygous
Ca21chr1_C_albicans_SC5314	837515	837556	P75063	SV	DEL	heterozygous
Ca21chr1_C_albicans_SC5314	851928	851990	P75063	SV	INS	heterozygous
Ca21chr1_C_albicans_SC5314	859265	859298	P75063	SV	DEL	heterozygous
Ca21chr1_C_albicans_SC5314	860911	860943	P75063	SV	INS	homozygous
Ca21chr1_C_albicans_SC5314	871588	871633	P75063	SV	INS	homozygous
Ca21chr1_C_albicans_SC5314	884430	884788	P75063	SV	INS	heterozygous
Ca21chr1_C_albicans_SC5314	1021312	1021598	P75063	SV	DEL	homozygous
Ca21chr1_C_albicans_SC5314	1023333	1023516	P75063	SV	INS	homozygous
Ca21chr1_C_albicans_SC5314	1032826	1032859	P75063	SV	DEL	heterozygous
Ca21chr1_C_albicans_SC5314	1036630	1036672	P75063	SV	DEL	homozygous
Ca21chr1_C_albicans_SC5314	1038923	1038959	P75063	SV	INS	heterozygous
Ca21chr1_C_albicans_SC5314	1054949	1055235	P75063	SV	DEL	heterozygous
Ca21chr1_C_albicans_SC5314	1063760	1063780	P75063	SV	INS	homozygous
Ca21chr1_C_albicans_SC5314	1089924	1090209	P75063	SV	INS	heterozygous
Ca21chr1_C_albicans_SC5314	1136474	1136959	P75063	SV	INS	heterozygous
Ca21chr1_C_albicans_SC5314	1166918	1173499	P75063	SV	INS	heterozygous
Ca21chr1_C_albicans_SC5314	1168219	1168519	P75063	SV	INS	heterozygous
Ca21chr1_C_albicans_SC5314	1223132	1223374	P75063	SV	INS	heterozygous
Ca21chr1_C_albicans_SC5314	1226156	1226193	P75063	SV	INS	heterozygous
Ca21chr1_C_albicans_SC5314	1229765	1229796	P75063	SV	DEL	homozygous
Ca21chr1_C_albicans_SC5314	1231093	1231127	P75063	SV	INS	heterozygous
Ca21chr1_C_albicans_SC5314	1263727	1263759	P75063	SV	DEL	heterozygous
Ca21chr1_C_albicans_SC5314	1293426	1293448	P75063	SV	DEL	homozygous
Ca21chr1_C_albicans_SC5314	1335132	1335348	P75063	SV	DEL	heterozygous
Ca21chr1_C_albicans_SC5314	1337340	1337483	P75063	SV	DEL	homozygous
Ca21chr1_C_albicans_SC5314	1343320	1343360	P75063	SV	INS	heterozygous
Ca21chr1_C_albicans_SC5314	1344801	1344935	P75063	SV	INS	heterozygous
Ca21chr1_C_albicans_SC5314	1347693	1347724	P75063	SV	DEL	homozygous
Ca21chr1_C_albicans_SC5314	1354127	1354158	P75063	SV	INS	homozygous
Ca21chr1_C_albicans_SC5314	1390590	1390619	P75063	SV	DEL	homozygous
Ca21chr1_C_albicans_SC5314	1427894	1435403	P75063	SV	INS	heterozygous
Ca21chr1_C_albicans_SC5314	1446136	1450872	P75063	SV	INS	heterozygous
Ca21chr1_C_albicans_SC5314	1487750	1494179	P75063	SV	INS	heterozygous
Ca21chr1_C_albicans_SC5314	1493776	1493810	P75063	SV	DEL	homozygous
Ca21chr1_C_albicans_SC5314	1498789	1498822	P75063	SV	INS	homozygous
Ca21chr1_C_albicans_SC5314	1504113	1504403	P75063	SV	INS	heterozygous
Ca21chr1_C_albicans_SC5314	1581058	1581416	P75063	SV	INS	heterozygous
Ca21chr1_C_albicans_SC5314	1619872	1619940	P75063	SV	INS	heterozygous
Ca21chr1_C_albicans_SC5314	1640596	1640630	P75063	SV	DEL	heterozygous
Ca21chr1_C_albicans_SC5314	1653879	1654075	P75063	SV	INS	homozygous
Ca21chr1_C_albicans_SC5314	1656721	1656854	P75063	SV	DEL	homozygous
Ca21chr1_C_albicans_SC5314	1659985	1660029	P75063	SV	INS	homozygous
Ca21chr1_C_albicans_SC5314	1669707	1669769	P75063	SV	DEL	homozygous
Ca21chr1_C_albicans_SC5314	1681106	1681169	P75063	SV	INS	heterozygous
Ca21chr1_C_albicans_SC5314	1688392	1688564	P75063	SV	INS	homozygous
Ca21chr1_C_albicans_SC5314	1688624	1688967	P75063	SV	DEL	heterozygous
Ca21chr1_C_albicans_SC5314	1695451	1695504	P75063	SV	DEL	heterozygous
Ca21chr1_C_albicans_SC5314	1729075	1729286	P75063	SV	INS	heterozygous
Ca21chr1_C_albicans_SC5314	1738709	1739185	P75063	SV	INS	heterozygous
Ca21chr1_C_albicans_SC5314	1739487	1739530	P75063	SV	DEL	heterozygous
Ca21chr1_C_albicans_SC5314	1808025	1808230	P75063	SV	DEL	homozygous
Ca21chr1_C_albicans_SC5314	1815247	1815530	P75063	SV	DEL	heterozygous
Ca21chr1_C_albicans_SC5314	1841524	1841809	P75063	SV	INS	heterozygous
Ca21chr1_C_albicans_SC5314	1879947	1880264	P75063	SV	INS	heterozygous
Ca21chr1_C_albicans_SC5314	1902457	1902969	P75063	SV	DEL	homozygous
Ca21chr1_C_albicans_SC5314	1935734	1936016	P75063	SV	DEL	homozygous
Ca21chr1_C_albicans_SC5314	1943399	1943464	P75063	SV	INS	homozygous
Ca21chr1_C_albicans_SC5314	1957077	1957119	P75063	SV	INS	homozygous
Ca21chr1_C_albicans_SC5314	1960969	1961018	P75063	SV	DEL	homozygous
Ca21chr1_C_albicans_SC5314	1966982	1967049	P75063	SV	INS	homozygous
Ca21chr1_C_albicans_SC5314	1967077	1967110	P75063	SV	DEL	homozygous
Ca21chr1_C_albicans_SC5314	1970108	1970162	P75063	SV	DEL	homozygous
Ca21chr1_C_albicans_SC5314	1980707	1980737	P75063	SV	DEL	homozygous
Ca21chr1_C_albicans_SC5314	2000749	2000781	P75063	SV	INS	heterozygous
Ca21chr1_C_albicans_SC5314	2073998	2074202	P75063	SV	INS	homozygous
Ca21chr1_C_albicans_SC5314	2180095	2180134	P75063	SV	DEL	homozygous
Ca21chr1_C_albicans_SC5314	2255372	2255723	P75063	SV	INS	homozygous
Ca21chr1_C_albicans_SC5314	2258895	2259180	P75063	SV	INS	homozygous
Ca21chr1_C_albicans_SC5314	2384078	2384133	P75063	SV	DEL	homozygous
Ca21chr1_C_albicans_SC5314	2449808	2449878	P75063	SV	INS	homozygous
Ca21chr1_C_albicans_SC5314	2464994	2465043	P75063	SV	INS	heterozygous
Ca21chr1_C_albicans_SC5314	2475986	2476022	P75063	SV	INS	homozygous
Ca21chr1_C_albicans_SC5314	2513438	2513754	P75063	SV	INS	homozygous
Ca21chr1_C_albicans_SC5314	2539030	2539060	P75063	SV	INS	heterozygous
Ca21chr1_C_albicans_SC5314	2572555	2573068	P75063	SV	INS	homozygous
Ca21chr1_C_albicans_SC5314	2590794	2591305	P75063	SV	DEL	homozygous
Ca21chr1_C_albicans_SC5314	2775187	2775219	P75063	SV	DEL	homozygous
Ca21chr1_C_albicans_SC5314	2776292	2776332	P75063	SV	INS	homozygous
Ca21chr1_C_albicans_SC5314	2839633	2839824	P75063	SV	INS	homozygous
Ca21chr1_C_albicans_SC5314	2854738	2854784	P75063	SV	INS	homozygous
Ca21chr1_C_albicans_SC5314	2887181	2887401	P75063	SV	DEL	homozygous
Ca21chr1_C_albicans_SC5314	2889978	2890195	P75063	SV	INS	homozygous
Ca21chr1_C_albicans_SC5314	2896466	2896539	P75063	SV	INS	homozygous
Ca21chr1_C_albicans_SC5314	2898406	2898434	P75063	SV	INS	homozygous
Ca21chr1_C_albicans_SC5314	2910783	2911068	P75063	SV	DEL	homozygous
Ca21chr1_C_albicans_SC5314	2924659	2930164	P75063	SV	INS	homozygous
Ca21chr1_C_albicans_SC5314	2946564	2946600	P75063	SV	INS	homozygous
Ca21chr1_C_albicans_SC5314	2955113	2955145	P75063	SV	INS	homozygous
Ca21chr1_C_albicans_SC5314	2963204	2963236	P75063	SV	DEL	homozygous
Ca21chr1_C_albicans_SC5314	2984302	2984587	P75063	SV	INS	homozygous
Ca21chr1_C_albicans_SC5314	3149369	3149572	P75063	SV	DEL	homozygous
Ca21chr1_C_albicans_SC5314	3178395	3178782	P75063	SV	DEL	homozygous
Ca21chr1_C_albicans_SC5314	3181819	3181868	P75063	SV	INS	heterozygous
Ca21chr2_C_albicans_SC5314	42062	42257	P75063	SV	INS	heterozygous
Ca21chr2_C_albicans_SC5314	86835	87236	P75063	SV	INS	heterozygous
Ca21chr2_C_albicans_SC5314	167363	167395	P75063	SV	DEL	homozygous
Ca21chr2_C_albicans_SC5314	179926	179968	P75063	SV	INS	heterozygous
Ca21chr2_C_albicans_SC5314	222626	222928	P75063	SV	INS	heterozygous
Ca21chr2_C_albicans_SC5314	223282	225441	P75063	SV	INS	homozygous
Ca21chr2_C_albicans_SC5314	234614	234644	P75063	SV	DEL	homozygous
Ca21chr2_C_albicans_SC5314	283921	284313	P75063	SV	INS	heterozygous
Ca21chr2_C_albicans_SC5314	328527	328558	P75063	SV	DEL	homozygous
Ca21chr2_C_albicans_SC5314	328617	328668	P75063	SV	DEL	homozygous
Ca21chr2_C_albicans_SC5314	330683	330723	P75063	SV	DEL	heterozygous
Ca21chr2_C_albicans_SC5314	338193	338254	P75063	SV	DEL	homozygous
Ca21chr2_C_albicans_SC5314	353448	353497	P75063	SV	DEL	homozygous
Ca21chr2_C_albicans_SC5314	360664	360966	P75063	SV	INS	heterozygous
Ca21chr2_C_albicans_SC5314	369080	369597	P75063	SV	INS	heterozygous
Ca21chr2_C_albicans_SC5314	375736	375772	P75063	SV	INS	heterozygous
Ca21chr2_C_albicans_SC5314	379467	379483	P75063	SV	DEL	heterozygous
Ca21chr2_C_albicans_SC5314	417821	417856	P75063	SV	DEL	homozygous
Ca21chr2_C_albicans_SC5314	424839	424895	P75063	SV	DEL	heterozygous
Ca21chr2_C_albicans_SC5314	426827	426879	P75063	SV	DEL	homozygous
Ca21chr2_C_albicans_SC5314	430365	430399	P75063	SV	DEL	homozygous
Ca21chr2_C_albicans_SC5314	436310	436340	P75063	SV	INS	homozygous
Ca21chr2_C_albicans_SC5314	437628	437661	P75063	SV	INS	homozygous
Ca21chr2_C_albicans_SC5314	455805	455853	P75063	SV	INS	homozygous
Ca21chr2_C_albicans_SC5314	484442	484916	P75063	SV	INS	heterozygous
Ca21chr2_C_albicans_SC5314	496363	496613	P75063	SV	DEL	homozygous
Ca21chr2_C_albicans_SC5314	515003	515037	P75063	SV	DEL	heterozygous
Ca21chr2_C_albicans_SC5314	526725	531588	P75063	SV	INS	heterozygous
Ca21chr2_C_albicans_SC5314	593817	594053	P75063	SV	DEL	heterozygous
Ca21chr2_C_albicans_SC5314	602027	602502	P75063	SV	INS	heterozygous
Ca21chr2_C_albicans_SC5314	619838	626928	P75063	SV	INS	heterozygous
Ca21chr2_C_albicans_SC5314	654939	655415	P75063	SV	DEL	heterozygous
Ca21chr2_C_albicans_SC5314	671379	671931	P75063	SV	DEL	heterozygous
Ca21chr2_C_albicans_SC5314	679450	679736	P75063	SV	INS	heterozygous
Ca21chr2_C_albicans_SC5314	695258	695658	P75063	SV	INS	heterozygous
Ca21chr2_C_albicans_SC5314	719725	719803	P75063	SV	INS	homozygous
Ca21chr2_C_albicans_SC5314	734874	735247	P75063	SV	DEL	homozygous
Ca21chr2_C_albicans_SC5314	737648	737698	P75063	SV	INS	homozygous
Ca21chr2_C_albicans_SC5314	738585	739097	P75063	SV	INS	heterozygous
Ca21chr2_C_albicans_SC5314	771048	771087	P75063	SV	DEL	homozygous
Ca21chr2_C_albicans_SC5314	858967	858999	P75063	SV	DEL	homozygous
Ca21chr2_C_albicans_SC5314	883295	883350	P75063	SV	DEL	heterozygous
Ca21chr2_C_albicans_SC5314	887280	890307	P75063	SV	INS	homozygous
Ca21chr2_C_albicans_SC5314	894752	894783	P75063	SV	DEL	heterozygous
Ca21chr2_C_albicans_SC5314	901917	903015	P75063	SV	INS	heterozygous
Ca21chr2_C_albicans_SC5314	927174	927649	P75063	SV	INS	heterozygous
Ca21chr2_C_albicans_SC5314	928239	928605	P75063	SV	DEL	heterozygous
Ca21chr2_C_albicans_SC5314	933484	933962	P75063	SV	INS	heterozygous
Ca21chr2_C_albicans_SC5314	935233	935266	P75063	SV	DEL	heterozygous
Ca21chr2_C_albicans_SC5314	954293	954328	P75063	SV	INS	homozygous
Ca21chr2_C_albicans_SC5314	970618	970652	P75063	SV	INS	heterozygous
Ca21chr2_C_albicans_SC5314	972046	972079	P75063	SV	DEL	homozygous
Ca21chr2_C_albicans_SC5314	973662	973702	P75063	SV	DEL	heterozygous
Ca21chr2_C_albicans_SC5314	975007	975038	P75063	SV	DEL	homozygous
Ca21chr2_C_albicans_SC5314	1002762	1002835	P75063	SV	DEL	homozygous
Ca21chr2_C_albicans_SC5314	1012410	1012886	P75063	SV	DEL	homozygous
Ca21chr2_C_albicans_SC5314	1024191	1024590	P75063	SV	DEL	homozygous
Ca21chr2_C_albicans_SC5314	1024586	1238013	P75063	SV	DEL	homozygous
Ca21chr2_C_albicans_SC5314	1042559	1042657	P75063	SV	INS	homozygous
Ca21chr2_C_albicans_SC5314	1053345	1053379	P75063	SV	DEL	homozygous
Ca21chr2_C_albicans_SC5314	1068686	1068972	P75063	SV	INS	heterozygous
Ca21chr2_C_albicans_SC5314	1077649	1077838	P75063	SV	INS	heterozygous
Ca21chr2_C_albicans_SC5314	1081598	1081658	P75063	SV	INS	homozygous
Ca21chr2_C_albicans_SC5314	1219012	1219062	P75063	SV	INS	homozygous
Ca21chr2_C_albicans_SC5314	1238012	1238411	P75063	SV	INS	heterozygous
Ca21chr2_C_albicans_SC5314	1290813	1291598	P75063	SV	INS	heterozygous
Ca21chr2_C_albicans_SC5314	1302074	1302276	P75063	SV	DEL	homozygous
Ca21chr2_C_albicans_SC5314	1362291	1362582	P75063	SV	INS	heterozygous
Ca21chr2_C_albicans_SC5314	1363978	1364050	P75063	SV	DEL	heterozygous
Ca21chr2_C_albicans_SC5314	1373829	1373877	P75063	SV	DEL	homozygous
Ca21chr2_C_albicans_SC5314	1381622	1381660	P75063	SV	DEL	homozygous
Ca21chr2_C_albicans_SC5314	1390367	1390408	P75063	SV	DEL	homozygous
Ca21chr2_C_albicans_SC5314	1406949	1406982	P75063	SV	DEL	heterozygous
Ca21chr2_C_albicans_SC5314	1416906	1417189	P75063	SV	DEL	heterozygous
Ca21chr2_C_albicans_SC5314	1418620	1418669	P75063	SV	DEL	homozygous
Ca21chr2_C_albicans_SC5314	1430444	1430473	P75063	SV	DEL	heterozygous
Ca21chr2_C_albicans_SC5314	1459308	1459634	P75063	SV	DEL	homozygous
Ca21chr2_C_albicans_SC5314	1471313	1471565	P75063	SV	INS	homozygous
Ca21chr2_C_albicans_SC5314	1523075	1523631	P75063	SV	INS	heterozygous
Ca21chr2_C_albicans_SC5314	1557586	1557904	P75063	SV	INS	heterozygous
Ca21chr2_C_albicans_SC5314	1586882	1587355	P75063	SV	INS	heterozygous
Ca21chr2_C_albicans_SC5314	1621641	1621932	P75063	SV	INS	heterozygous
Ca21chr2_C_albicans_SC5314	1684198	1684481	P75063	SV	INS	heterozygous
Ca21chr2_C_albicans_SC5314	1750854	1750912	P75063	SV	DEL	homozygous
Ca21chr2_C_albicans_SC5314	1755501	1755723	P75063	SV	DEL	heterozygous
Ca21chr2_C_albicans_SC5314	1768121	1768195	P75063	SV	INS	homozygous
Ca21chr2_C_albicans_SC5314	1769474	1769506	P75063	SV	INS	heterozygous
Ca21chr2_C_albicans_SC5314	1770882	1770912	P75063	SV	INS	homozygous
Ca21chr2_C_albicans_SC5314	1772006	1772046	P75063	SV	INS	heterozygous
Ca21chr2_C_albicans_SC5314	1773792	1773888	P75063	SV	DEL	heterozygous
Ca21chr2_C_albicans_SC5314	1801426	1801543	P75063	SV	INS	homozygous
Ca21chr2_C_albicans_SC5314	1857921	1857955	P75063	SV	INS	homozygous
Ca21chr2_C_albicans_SC5314	1867282	1867322	P75063	SV	DEL	homozygous
Ca21chr2_C_albicans_SC5314	1867396	1867468	P75063	SV	INS	homozygous
Ca21chr2_C_albicans_SC5314	1878438	1878663	P75063	SV	DEL	homozygous
Ca21chr2_C_albicans_SC5314	1915562	1915833	P75063	SV	INS	heterozygous
Ca21chr2_C_albicans_SC5314	1930172	1930623	P75063	SV	INS	heterozygous
Ca21chr2_C_albicans_SC5314	1951772	1953015	P75063	SV	INS	homozygous
Ca21chr2_C_albicans_SC5314	1951919	1954400	P75063	SV	INS	heterozygous
Ca21chr2_C_albicans_SC5314	1952548	1952608	P75063	SV	DEL	heterozygous
Ca21chr2_C_albicans_SC5314	1952549	1952814	P75063	SV	DEL	heterozygous
Ca21chr2_C_albicans_SC5314	1952672	1952733	P75063	SV	DEL	heterozygous
Ca21chr2_C_albicans_SC5314	2069592	2069625	P75063	SV	INS	heterozygous
Ca21chr2_C_albicans_SC5314	2083248	2083276	P75063	SV	INS	homozygous
Ca21chr2_C_albicans_SC5314	2083399	2083456	P75063	SV	DEL	homozygous
Ca21chr2_C_albicans_SC5314	2086437	2086501	P75063	SV	INS	homozygous
Ca21chr2_C_albicans_SC5314	2149008	2151457	P75063	SV	INS	homozygous
Ca21chr2_C_albicans_SC5314	2149053	2151501	P75063	SV	INS	homozygous
Ca21chr2_C_albicans_SC5314	2149111	2156114	P75063	SV	INS	homozygous
Ca21chr2_C_albicans_SC5314	2155694	2155736	P75063	SV	INS	homozygous
Ca21chr2_C_albicans_SC5314	2169093	2169363	P75063	SV	DEL	heterozygous
Ca21chr3_C_albicans_SC5314	396	10218	P75063	SV	DUP	homozygous
Ca21chr3_C_albicans_SC5314	398	403	P75063	SV	BND	homozygous
Ca21chr3_C_albicans_SC5314	5447	1791540	P75063	SV	INV	heterozygous
Ca21chr3_C_albicans_SC5314	10041	10352	P75063	SV	INS	heterozygous
Ca21chr3_C_albicans_SC5314	10218	10223	P75063	SV	BND	heterozygous
Ca21chr3_C_albicans_SC5314	10223	10228	P75063	SV	BND	heterozygous
Ca21chr3_C_albicans_SC5314	91870	92015	P75063	SV	DEL	heterozygous
Ca21chr3_C_albicans_SC5314	208078	208108	P75063	SV	INS	homozygous
Ca21chr3_C_albicans_SC5314	230770	230813	P75063	SV	INS	homozygous
Ca21chr3_C_albicans_SC5314	230983	231020	P75063	SV	INS	homozygous
Ca21chr3_C_albicans_SC5314	262002	262392	P75063	SV	INS	homozygous
Ca21chr3_C_albicans_SC5314	270966	271068	P75063	SV	INS	heterozygous
Ca21chr3_C_albicans_SC5314	295744	296128	P75063	SV	DEL	homozygous
Ca21chr3_C_albicans_SC5314	307943	307978	P75063	SV	DEL	homozygous
Ca21chr3_C_albicans_SC5314	423896	424298	P75063	SV	INS	homozygous
Ca21chr3_C_albicans_SC5314	423901	423906	P75063	SV	BND	homozygous
Ca21chr3_C_albicans_SC5314	447476	452738	P75063	SV	INS	homozygous
Ca21chr3_C_albicans_SC5314	521557	521969	P75063	SV	DEL	homozygous
Ca21chr3_C_albicans_SC5314	524298	524361	P75063	SV	INS	homozygous
Ca21chr3_C_albicans_SC5314	528648	528680	P75063	SV	DEL	heterozygous
Ca21chr3_C_albicans_SC5314	528874	528916	P75063	SV	INS	homozygous
Ca21chr3_C_albicans_SC5314	530087	530121	P75063	SV	DEL	homozygous
Ca21chr3_C_albicans_SC5314	597317	597440	P75063	SV	INS	homozygous
Ca21chr3_C_albicans_SC5314	645708	646057	P75063	SV	INS	heterozygous
Ca21chr3_C_albicans_SC5314	655956	656490	P75063	SV	INS	homozygous
Ca21chr3_C_albicans_SC5314	655960	1647494	P75063	SV	INV	homozygous
Ca21chr3_C_albicans_SC5314	658185	658218	P75063	SV	INS	heterozygous
Ca21chr3_C_albicans_SC5314	763390	768227	P75063	SV	INS	homozygous
Ca21chr3_C_albicans_SC5314	806206	811073	P75063	SV	INS	heterozygous
Ca21chr3_C_albicans_SC5314	810875	815659	P75063	SV	INS	heterozygous
Ca21chr3_C_albicans_SC5314	869403	869926	P75063	SV	INS	heterozygous
Ca21chr3_C_albicans_SC5314	880612	881163	P75063	SV	INS	heterozygous
Ca21chr3_C_albicans_SC5314	880613	880618	P75063	SV	BND	homozygous
Ca21chr3_C_albicans_SC5314	880616	880621	P75063	SV	BND	homozygous
Ca21chr3_C_albicans_SC5314	892815	892992	P75063	SV	INS	homozygous
Ca21chr3_C_albicans_SC5314	952202	952284	P75063	SV	INS	homozygous
Ca21chr3_C_albicans_SC5314	962936	962970	P75063	SV	DEL	homozygous
Ca21chr3_C_albicans_SC5314	1038216	1038289	P75063	SV	INS	homozygous
Ca21chr3_C_albicans_SC5314	1039114	1039228	P75063	SV	INS	homozygous
Ca21chr3_C_albicans_SC5314	1039160	1039559	P75063	SV	INS	homozygous
Ca21chr3_C_albicans_SC5314	1041278	1041331	P75063	SV	INS	homozygous
Ca21chr3_C_albicans_SC5314	1067526	1068038	P75063	SV	INS	heterozygous
Ca21chr3_C_albicans_SC5314	1082152	1082233	P75063	SV	INS	heterozygous
Ca21chr3_C_albicans_SC5314	1085601	1085727	P75063	SV	INS	homozygous
Ca21chr3_C_albicans_SC5314	1087157	1087576	P75063	SV	INS	heterozygous
Ca21chr3_C_albicans_SC5314	1110218	1110509	P75063	SV	INS	homozygous
Ca21chr3_C_albicans_SC5314	1150880	1156092	P75063	SV	INS	heterozygous
Ca21chr3_C_albicans_SC5314	1157986	1158309	P75063	SV	DEL	homozygous
Ca21chr3_C_albicans_SC5314	1164184	1164218	P75063	SV	DEL	heterozygous
Ca21chr3_C_albicans_SC5314	1176527	1177844	P75063	SV	INS	heterozygous
Ca21chr3_C_albicans_SC5314	1209570	1209603	P75063	SV	INS	homozygous
Ca21chr3_C_albicans_SC5314	1211328	1211574	P75063	SV	INS	heterozygous
Ca21chr3_C_albicans_SC5314	1212309	1212344	P75063	SV	DEL	heterozygous
Ca21chr3_C_albicans_SC5314	1218216	1218259	P75063	SV	INS	homozygous
Ca21chr3_C_albicans_SC5314	1219682	1219818	P75063	SV	DEL	homozygous
Ca21chr3_C_albicans_SC5314	1221169	1221217	P75063	SV	INS	heterozygous
Ca21chr3_C_albicans_SC5314	1226495	1226526	P75063	SV	INS	homozygous
Ca21chr3_C_albicans_SC5314	1273018	1273232	P75063	SV	DEL	homozygous
Ca21chr3_C_albicans_SC5314	1280736	1280772	P75063	SV	DEL	homozygous
Ca21chr3_C_albicans_SC5314	1283654	1283694	P75063	SV	INS	homozygous
Ca21chr3_C_albicans_SC5314	1302739	1302771	P75063	SV	DEL	heterozygous
Ca21chr3_C_albicans_SC5314	1304886	1309632	P75063	SV	INS	heterozygous
Ca21chr3_C_albicans_SC5314	1320389	1320423	P75063	SV	DEL	homozygous
Ca21chr3_C_albicans_SC5314	1343501	1343530	P75063	SV	INS	homozygous
Ca21chr3_C_albicans_SC5314	1370145	1370324	P75063	SV	INS	homozygous
Ca21chr3_C_albicans_SC5314	1398496	1398527	P75063	SV	INS	heterozygous
Ca21chr3_C_albicans_SC5314	1404160	1405356	P75063	SV	INS	homozygous
Ca21chr3_C_albicans_SC5314	1410510	1410834	P75063	SV	INS	homozygous
Ca21chr3_C_albicans_SC5314	1415361	1415897	P75063	SV	INS	homozygous
Ca21chr3_C_albicans_SC5314	1449296	1449678	P75063	SV	INS	homozygous
Ca21chr3_C_albicans_SC5314	1470999	1471050	P75063	SV	INS	homozygous
Ca21chr3_C_albicans_SC5314	1587245	1587306	P75063	SV	DEL	homozygous
Ca21chr3_C_albicans_SC5314	1611514	1611546	P75063	SV	DEL	homozygous
Ca21chr3_C_albicans_SC5314	1618320	1618354	P75063	SV	DEL	homozygous
Ca21chr3_C_albicans_SC5314	1638699	1638729	P75063	SV	INS	heterozygous
Ca21chr3_C_albicans_SC5314	1643051	1643129	P75063	SV	DEL	homozygous
Ca21chr3_C_albicans_SC5314	1646953	1647490	P75063	SV	DEL	homozygous
Ca21chr3_C_albicans_SC5314	1646962	1646967	P75063	SV	BND	heterozygous
Ca21chr3_C_albicans_SC5314	1787656	1787881	P75063	SV	DEL	heterozygous
Ca21chr3_C_albicans_SC5314	1787881	1787886	P75063	SV	BND	homozygous
Ca21chr4_C_albicans_SC5314	1342	1605	P75063	SV	INS	homozygous
Ca21chr4_C_albicans_SC5314	164278	166587	P75063	SV	INS	homozygous
Ca21chr4_C_albicans_SC5314	172590	172957	P75063	SV	INS	heterozygous
Ca21chr4_C_albicans_SC5314	173599	173631	P75063	SV	DEL	homozygous
Ca21chr4_C_albicans_SC5314	197643	197679	P75063	SV	INS	homozygous
Ca21chr4_C_albicans_SC5314	204407	204503	P75063	SV	INS	homozygous
Ca21chr4_C_albicans_SC5314	207558	207811	P75063	SV	DEL	homozygous
Ca21chr4_C_albicans_SC5314	209233	209286	P75063	SV	INS	heterozygous
Ca21chr4_C_albicans_SC5314	227763	228163	P75063	SV	INS	heterozygous
Ca21chr4_C_albicans_SC5314	254547	254605	P75063	SV	DEL	homozygous
Ca21chr4_C_albicans_SC5314	275154	275186	P75063	SV	DEL	heterozygous
Ca21chr4_C_albicans_SC5314	283820	283857	P75063	SV	DEL	homozygous
Ca21chr4_C_albicans_SC5314	297351	297412	P75063	SV	DEL	homozygous
Ca21chr4_C_albicans_SC5314	305080	305152	P75063	SV	INS	homozygous
Ca21chr4_C_albicans_SC5314	312473	312506	P75063	SV	INS	homozygous
Ca21chr4_C_albicans_SC5314	314572	314603	P75063	SV	INS	heterozygous
Ca21chr4_C_albicans_SC5314	328832	328865	P75063	SV	INS	homozygous
Ca21chr4_C_albicans_SC5314	357557	357928	P75063	SV	DEL	heterozygous
Ca21chr4_C_albicans_SC5314	362176	362460	P75063	SV	INS	heterozygous
Ca21chr4_C_albicans_SC5314	511029	511067	P75063	SV	DEL	homozygous
Ca21chr4_C_albicans_SC5314	526740	526764	P75063	SV	INS	heterozygous
Ca21chr4_C_albicans_SC5314	585843	586329	P75063	SV	DEL	heterozygous
Ca21chr4_C_albicans_SC5314	637131	637645	P75063	SV	DEL	homozygous
Ca21chr4_C_albicans_SC5314	648829	649186	P75063	SV	INS	heterozygous
Ca21chr4_C_albicans_SC5314	673946	680848	P75063	SV	DEL	homozygous
Ca21chr4_C_albicans_SC5314	729494	729568	P75063	SV	INS	heterozygous
Ca21chr4_C_albicans_SC5314	745631	745718	P75063	SV	INS	homozygous
Ca21chr4_C_albicans_SC5314	807548	807590	P75063	SV	INS	heterozygous
Ca21chr4_C_albicans_SC5314	828236	828285	P75063	SV	DEL	heterozygous
Ca21chr4_C_albicans_SC5314	831526	831783	P75063	SV	INS	heterozygous
Ca21chr4_C_albicans_SC5314	843805	844008	P75063	SV	DEL	homozygous
Ca21chr4_C_albicans_SC5314	858258	858295	P75063	SV	DEL	heterozygous
Ca21chr4_C_albicans_SC5314	890086	890121	P75063	SV	INS	heterozygous
Ca21chr4_C_albicans_SC5314	933995	934070	P75063	SV	INS	homozygous
Ca21chr4_C_albicans_SC5314	936222	936247	P75063	SV	INS	homozygous
Ca21chr4_C_albicans_SC5314	936622	938785	P75063	SV	INS	heterozygous
Ca21chr4_C_albicans_SC5314	942667	945289	P75063	SV	INS	heterozygous
Ca21chr4_C_albicans_SC5314	990576	991086	P75063	SV	INS	heterozygous
Ca21chr4_C_albicans_SC5314	996047	997872	P75063	SV	DEL	heterozygous
Ca21chr4_C_albicans_SC5314	1055069	1055098	P75063	SV	INS	homozygous
Ca21chr4_C_albicans_SC5314	1077976	1078006	P75063	SV	INS	heterozygous
Ca21chr4_C_albicans_SC5314	1120629	1120831	P75063	SV	INS	homozygous
Ca21chr4_C_albicans_SC5314	1130832	1130872	P75063	SV	DEL	homozygous
Ca21chr4_C_albicans_SC5314	1134737	1134801	P75063	SV	DEL	homozygous
Ca21chr4_C_albicans_SC5314	1158445	1158493	P75063	SV	INS	heterozygous
Ca21chr4_C_albicans_SC5314	1161703	1161736	P75063	SV	INS	homozygous
Ca21chr4_C_albicans_SC5314	1178664	1179179	P75063	SV	DEL	homozygous
Ca21chr4_C_albicans_SC5314	1193917	1194119	P75063	SV	DEL	homozygous
Ca21chr4_C_albicans_SC5314	1201842	1202014	P75063	SV	DEL	heterozygous
Ca21chr4_C_albicans_SC5314	1201995	1202340	P75063	SV	DEL	heterozygous
Ca21chr4_C_albicans_SC5314	1262679	1262876	P75063	SV	DEL	heterozygous
Ca21chr4_C_albicans_SC5314	1401141	1401176	P75063	SV	INS	homozygous
Ca21chr4_C_albicans_SC5314	1425777	1425819	P75063	SV	DEL	homozygous
Ca21chr4_C_albicans_SC5314	1425840	1426268	P75063	SV	INS	homozygous
Ca21chr4_C_albicans_SC5314	1443898	1443978	P75063	SV	DEL	homozygous
Ca21chr4_C_albicans_SC5314	1454427	1455121	P75063	SV	INS	homozygous
Ca21chr4_C_albicans_SC5314	1466127	1472839	P75063	SV	INS	homozygous
Ca21chr4_C_albicans_SC5314	1503534	1503609	P75063	SV	DEL	homozygous
Ca21chr4_C_albicans_SC5314	1581638	1581761	P75063	SV	INS	homozygous
Ca21chr4_C_albicans_SC5314	1597625	1597731	P75063	SV	INS	homozygous
Ca21chr4_C_albicans_SC5314	1598432	1599007	P75063	SV	INS	homozygous
Ca21chr4_C_albicans_SC5314	1600337	1600342	P75063	SV	BND	heterozygous
Ca21chr5_C_albicans_SC5314	118367	118446	P75063	SV	INS	homozygous
Ca21chr5_C_albicans_SC5314	121090	121412	P75063	SV	INS	homozygous
Ca21chr5_C_albicans_SC5314	164286	164329	P75063	SV	DEL	homozygous
Ca21chr5_C_albicans_SC5314	166320	166354	P75063	SV	DEL	heterozygous
Ca21chr5_C_albicans_SC5314	306613	306866	P75063	SV	DEL	homozygous
Ca21chr5_C_albicans_SC5314	371271	371308	P75063	SV	DEL	homozygous
Ca21chr5_C_albicans_SC5314	466129	466652	P75063	SV	INS	heterozygous
Ca21chr5_C_albicans_SC5314	468509	471783	P75063	SV	INV	heterozygous
Ca21chr5_C_albicans_SC5314	469676	470151	P75063	SV	INS	heterozygous
Ca21chr5_C_albicans_SC5314	500704	501180	P75063	SV	DEL	homozygous
Ca21chr5_C_albicans_SC5314	534808	535132	P75063	SV	DEL	homozygous
Ca21chr5_C_albicans_SC5314	560922	561610	P75063	SV	INS	heterozygous
Ca21chr5_C_albicans_SC5314	564884	564922	P75063	SV	DEL	homozygous
Ca21chr5_C_albicans_SC5314	582627	582671	P75063	SV	INS	heterozygous
Ca21chr5_C_albicans_SC5314	584181	584215	P75063	SV	DEL	homozygous
Ca21chr5_C_albicans_SC5314	586437	586474	P75063	SV	DEL	homozygous
Ca21chr5_C_albicans_SC5314	610967	611442	P75063	SV	INS	homozygous
Ca21chr5_C_albicans_SC5314	619988	620008	P75063	SV	INS	homozygous
Ca21chr5_C_albicans_SC5314	651487	651963	P75063	SV	INS	heterozygous
Ca21chr5_C_albicans_SC5314	656800	656831	P75063	SV	INS	homozygous
Ca21chr5_C_albicans_SC5314	673138	674117	P75063	SV	INS	homozygous
Ca21chr5_C_albicans_SC5314	769865	770146	P75063	SV	INS	homozygous
Ca21chr5_C_albicans_SC5314	785994	786033	P75063	SV	INS	homozygous
Ca21chr5_C_albicans_SC5314	848761	848795	P75063	SV	INS	homozygous
Ca21chr5_C_albicans_SC5314	867507	867788	P75063	SV	INS	homozygous
Ca21chr5_C_albicans_SC5314	895902	895936	P75063	SV	DEL	homozygous
Ca21chr5_C_albicans_SC5314	920531	920598	P75063	SV	DEL	homozygous
Ca21chr5_C_albicans_SC5314	964543	964623	P75063	SV	DEL	homozygous
Ca21chr5_C_albicans_SC5314	965664	965700	P75063	SV	INS	homozygous
Ca21chr5_C_albicans_SC5314	966811	970183	P75063	SV	DEL	homozygous
Ca21chr5_C_albicans_SC5314	1019785	1020297	P75063	SV	INS	homozygous
Ca21chr5_C_albicans_SC5314	1044403	1044927	P75063	SV	INS	homozygous
Ca21chr5_C_albicans_SC5314	1064124	1064231	P75063	SV	INS	homozygous
Ca21chr5_C_albicans_SC5314	1182109	1182114	P75063	SV	BND	homozygous
Ca21chr5_C_albicans_SC5314	1182522	1182574	P75063	SV	DEL	homozygous
Ca21chr5_C_albicans_SC5314	1185789	1185794	P75063	SV	BND	heterozygous
Ca21chr6_C_albicans_SC5314	1131	1136	P75063	SV	BND	heterozygous
Ca21chr6_C_albicans_SC5314	1356	1395	P75063	SV	INS	heterozygous
Ca21chr6_C_albicans_SC5314	4656	4687	P75063	SV	INS	heterozygous
Ca21chr6_C_albicans_SC5314	5001	5303	P75063	SV	INS	homozygous
Ca21chr6_C_albicans_SC5314	5101	5106	P75063	SV	BND	homozygous
Ca21chr6_C_albicans_SC5314	22006	22059	P75063	SV	DEL	homozygous
Ca21chr6_C_albicans_SC5314	79190	79242	P75063	SV	DEL	homozygous
Ca21chr6_C_albicans_SC5314	121700	121752	P75063	SV	DEL	homozygous
Ca21chr6_C_albicans_SC5314	155083	155576	P75063	SV	INS	homozygous
Ca21chr6_C_albicans_SC5314	162575	162627	P75063	SV	DEL	homozygous
Ca21chr6_C_albicans_SC5314	168436	168742	P75063	SV	INS	homozygous
Ca21chr6_C_albicans_SC5314	173868	174246	P75063	SV	DEL	homozygous
Ca21chr6_C_albicans_SC5314	209275	209312	P75063	SV	DEL	homozygous
Ca21chr6_C_albicans_SC5314	240359	245425	P75063	SV	DEL	homozygous
Ca21chr6_C_albicans_SC5314	260422	260474	P75063	SV	DEL	homozygous
Ca21chr6_C_albicans_SC5314	396332	396383	P75063	SV	DEL	homozygous
Ca21chr6_C_albicans_SC5314	416500	416552	P75063	SV	DEL	homozygous
Ca21chr6_C_albicans_SC5314	445209	445260	P75063	SV	DEL	homozygous
Ca21chr6_C_albicans_SC5314	477923	478002	P75063	SV	DEL	homozygous
Ca21chr6_C_albicans_SC5314	484796	484828	P75063	SV	DEL	heterozygous
Ca21chr6_C_albicans_SC5314	487677	487753	P75063	SV	INS	homozygous
Ca21chr6_C_albicans_SC5314	505457	505509	P75063	SV	DEL	homozygous
Ca21chr6_C_albicans_SC5314	557147	557152	P75063	SV	BND	homozygous
Ca21chr6_C_albicans_SC5314	557147	557152	P75063	SV	BND	heterozygous
Ca21chr6_C_albicans_SC5314	557149	557154	P75063	SV	BND	homozygous
Ca21chr6_C_albicans_SC5314	557660	557665	P75063	SV	BND	heterozygous
Ca21chr6_C_albicans_SC5314	566545	566575	P75063	SV	INS	homozygous
Ca21chr6_C_albicans_SC5314	582201	582247	P75063	SV	INS	heterozygous
Ca21chr6_C_albicans_SC5314	596016	596492	P75063	SV	INS	heterozygous
Ca21chr6_C_albicans_SC5314	614307	614516	P75063	SV	INS	heterozygous
Ca21chr6_C_albicans_SC5314	686186	686234	P75063	SV	INS	homozygous
Ca21chr6_C_albicans_SC5314	700162	700481	P75063	SV	INS	homozygous
Ca21chr6_C_albicans_SC5314	708979	709320	P75063	SV	INS	heterozygous
Ca21chr6_C_albicans_SC5314	720249	720300	P75063	SV	DEL	homozygous
Ca21chr6_C_albicans_SC5314	750829	751116	P75063	SV	INS	heterozygous
Ca21chr6_C_albicans_SC5314	752393	752869	P75063	SV	INS	heterozygous
Ca21chr6_C_albicans_SC5314	780457	780462	P75063	SV	BND	heterozygous
Ca21chr6_C_albicans_SC5314	792947	793813	P75063	SV	INS	homozygous
Ca21chr6_C_albicans_SC5314	793340	793448	P75063	SV	INS	homozygous
Ca21chr6_C_albicans_SC5314	799354	800111	P75063	SV	DEL	heterozygous
Ca21chr6_C_albicans_SC5314	799356	799895	P75063	SV	DEL	homozygous
Ca21chr6_C_albicans_SC5314	799552	799661	P75063	SV	DEL	homozygous
Ca21chr6_C_albicans_SC5314	799552	799877	P75063	SV	DEL	homozygous
Ca21chr6_C_albicans_SC5314	801648	801792	P75063	SV	INS	homozygous
Ca21chr6_C_albicans_SC5314	802485	802602	P75063	SV	INS	homozygous
Ca21chr6_C_albicans_SC5314	851233	851711	P75063	SV	INS	heterozygous
Ca21chr6_C_albicans_SC5314	867176	867521	P75063	SV	DEL	heterozygous
Ca21chr6_C_albicans_SC5314	875597	875798	P75063	SV	INS	heterozygous
Ca21chr6_C_albicans_SC5314	877202	877253	P75063	SV	DEL	homozygous
Ca21chr6_C_albicans_SC5314	886804	886838	P75063	SV	DEL	heterozygous
Ca21chr6_C_albicans_SC5314	888654	889168	P75063	SV	DEL	homozygous
Ca21chr6_C_albicans_SC5314	896087	896138	P75063	SV	DEL	homozygous
Ca21chr6_C_albicans_SC5314	899916	900239	P75063	SV	INS	heterozygous
Ca21chr6_C_albicans_SC5314	900032	900462	P75063	SV	INS	homozygous
Ca21chr6_C_albicans_SC5314	900219	900328	P75063	SV	DEL	homozygous
Ca21chr6_C_albicans_SC5314	900627	900843	P75063	SV	INS	heterozygous
Ca21chr6_C_albicans_SC5314	901480	902560	P75063	SV	DEL	heterozygous
Ca21chr6_C_albicans_SC5314	902130	902671	P75063	SV	DEL	heterozygous
Ca21chr6_C_albicans_SC5314	903305	903413	P75063	SV	DEL	heterozygous
Ca21chr6_C_albicans_SC5314	913733	913782	P75063	SV	DEL	homozygous
Ca21chr6_C_albicans_SC5314	920642	920691	P75063	SV	INS	heterozygous
Ca21chr6_C_albicans_SC5314	922726	922774	P75063	SV	INS	heterozygous
Ca21chr6_C_albicans_SC5314	923559	923608	P75063	SV	DEL	homozygous
Ca21chr6_C_albicans_SC5314	924535	924595	P75063	SV	INS	homozygous
Ca21chr6_C_albicans_SC5314	924756	924792	P75063	SV	DEL	homozygous
Ca21chr6_C_albicans_SC5314	934632	934664	P75063	SV	INS	homozygous
Ca21chr6_C_albicans_SC5314	973001	973218	P75063	SV	DEL	heterozygous
Ca21chr6_C_albicans_SC5314	973715	974256	P75063	SV	DEL	heterozygous
Ca21chr6_C_albicans_SC5314	977483	977592	P75063	SV	DEL	heterozygous
Ca21chr6_C_albicans_SC5314	979810	979861	P75063	SV	DEL	homozygous
Ca21chr6_C_albicans_SC5314	986615	987796	P75063	SV	DEL	homozygous
Ca21chr6_C_albicans_SC5314	995451	995496	P75063	SV	INS	heterozygous
Ca21chr6_C_albicans_SC5314	1003861	1004342	P75063	SV	INS	heterozygous
Ca21chr7_C_albicans_SC5314	11205	11783	P75063	SV	INS	heterozygous
Ca21chr7_C_albicans_SC5314	75724	75766	P75063	SV	INS	homozygous
Ca21chr7_C_albicans_SC5314	88270	88598	P75063	SV	DEL	homozygous
Ca21chr7_C_albicans_SC5314	109662	111832	P75063	SV	DEL	homozygous
Ca21chr7_C_albicans_SC5314	109671	694960	P75063	SV	DUP	heterozygous
Ca21chr7_C_albicans_SC5314	109672	109677	P75063	SV	BND	homozygous
Ca21chr7_C_albicans_SC5314	109672	109677	P75063	SV	BND	heterozygous
Ca21chr7_C_albicans_SC5314	111830	695519	P75063	SV	DEL	heterozygous
Ca21chr7_C_albicans_SC5314	111832	111837	P75063	SV	BND	homozygous
Ca21chr7_C_albicans_SC5314	111833	111838	P75063	SV	BND	heterozygous
Ca21chr7_C_albicans_SC5314	114434	114524	P75063	SV	DEL	homozygous
Ca21chr7_C_albicans_SC5314	160498	160540	P75063	SV	INS	homozygous
Ca21chr7_C_albicans_SC5314	165409	171391	P75063	SV	INS	heterozygous
Ca21chr7_C_albicans_SC5314	165412	521437	P75063	SV	INV	homozygous
Ca21chr7_C_albicans_SC5314	165415	528932	P75063	SV	INV	homozygous
Ca21chr7_C_albicans_SC5314	169853	170066	P75063	SV	INS	heterozygous
Ca21chr7_C_albicans_SC5314	175530	175560	P75063	SV	INS	heterozygous
Ca21chr7_C_albicans_SC5314	176325	176382	P75063	SV	DEL	homozygous
Ca21chr7_C_albicans_SC5314	194581	197192	P75063	SV	INS	heterozygous
Ca21chr7_C_albicans_SC5314	228309	228342	P75063	SV	DEL	heterozygous
Ca21chr7_C_albicans_SC5314	234895	235239	P75063	SV	INS	homozygous
Ca21chr7_C_albicans_SC5314	234932	235104	P75063	SV	INS	homozygous
Ca21chr7_C_albicans_SC5314	241803	241866	P75063	SV	DEL	heterozygous
Ca21chr7_C_albicans_SC5314	249770	249981	P75063	SV	INS	heterozygous
Ca21chr7_C_albicans_SC5314	256944	257320	P75063	SV	DEL	homozygous
Ca21chr7_C_albicans_SC5314	275722	278376	P75063	SV	INS	homozygous
Ca21chr7_C_albicans_SC5314	277882	278668	P75063	SV	INS	heterozygous
Ca21chr7_C_albicans_SC5314	277887	835917	P75063	SV	INV	homozygous
Ca21chr7_C_albicans_SC5314	281166	281209	P75063	SV	DEL	homozygous
Ca21chr7_C_albicans_SC5314	285423	285454	P75063	SV	INS	homozygous
Ca21chr7_C_albicans_SC5314	293246	293278	P75063	SV	DEL	homozygous
Ca21chr7_C_albicans_SC5314	304796	304840	P75063	SV	INS	homozygous
Ca21chr7_C_albicans_SC5314	336062	336099	P75063	SV	DEL	homozygous
Ca21chr7_C_albicans_SC5314	366169	366237	P75063	SV	DEL	heterozygous
Ca21chr7_C_albicans_SC5314	379312	379355	P75063	SV	INS	heterozygous
Ca21chr7_C_albicans_SC5314	417851	417883	P75063	SV	DEL	homozygous
Ca21chr7_C_albicans_SC5314	425259	425783	P75063	SV	INS	heterozygous
Ca21chr7_C_albicans_SC5314	434113	434484	P75063	SV	INS	heterozygous
Ca21chr7_C_albicans_SC5314	461497	461972	P75063	SV	INS	heterozygous
Ca21chr7_C_albicans_SC5314	471844	472130	P75063	SV	INS	heterozygous
Ca21chr7_C_albicans_SC5314	489813	489897	P75063	SV	INS	homozygous
Ca21chr7_C_albicans_SC5314	505396	505433	P75063	SV	INS	heterozygous
Ca21chr7_C_albicans_SC5314	521430	528930	P75063	SV	DEL	homozygous
Ca21chr7_C_albicans_SC5314	521440	521445	P75063	SV	BND	heterozygous
Ca21chr7_C_albicans_SC5314	528931	528936	P75063	SV	BND	heterozygous
Ca21chr7_C_albicans_SC5314	542666	542708	P75063	SV	INS	heterozygous
Ca21chr7_C_albicans_SC5314	553912	560339	P75063	SV	DEL	homozygous
Ca21chr7_C_albicans_SC5314	553921	553926	P75063	SV	BND	heterozygous
Ca21chr7_C_albicans_SC5314	560340	560345	P75063	SV	BND	heterozygous
Ca21chr7_C_albicans_SC5314	571205	571267	P75063	SV	INS	heterozygous
Ca21chr7_C_albicans_SC5314	571711	571742	P75063	SV	INS	heterozygous
Ca21chr7_C_albicans_SC5314	571873	571917	P75063	SV	INS	heterozygous
Ca21chr7_C_albicans_SC5314	575466	575529	P75063	SV	DEL	heterozygous
Ca21chr7_C_albicans_SC5314	576180	576567	P75063	SV	INS	homozygous
Ca21chr7_C_albicans_SC5314	578359	578405	P75063	SV	DEL	heterozygous
Ca21chr7_C_albicans_SC5314	582477	582649	P75063	SV	INS	homozygous
Ca21chr7_C_albicans_SC5314	582673	584773	P75063	SV	INS	homozygous
Ca21chr7_C_albicans_SC5314	582724	582868	P75063	SV	INS	homozygous
Ca21chr7_C_albicans_SC5314	582854	583026	P75063	SV	DEL	heterozygous
Ca21chr7_C_albicans_SC5314	583021	586002	P75063	SV	INS	homozygous
Ca21chr7_C_albicans_SC5314	589559	589613	P75063	SV	INS	homozygous
Ca21chr7_C_albicans_SC5314	604888	604974	P75063	SV	INS	heterozygous
Ca21chr7_C_albicans_SC5314	606355	609536	P75063	SV	INS	heterozygous
Ca21chr7_C_albicans_SC5314	608555	608759	P75063	SV	INS	heterozygous
Ca21chr7_C_albicans_SC5314	614706	615074	P75063	SV	INS	heterozygous
Ca21chr7_C_albicans_SC5314	621284	626014	P75063	SV	INS	heterozygous
Ca21chr7_C_albicans_SC5314	639197	639673	P75063	SV	INS	heterozygous
Ca21chr7_C_albicans_SC5314	668724	668976	P75063	SV	INS	heterozygous
Ca21chr7_C_albicans_SC5314	673934	673939	P75063	SV	BND	homozygous
Ca21chr7_C_albicans_SC5314	674236	674241	P75063	SV	BND	heterozygous
Ca21chr7_C_albicans_SC5314	691513	691547	P75063	SV	DEL	heterozygous
Ca21chr7_C_albicans_SC5314	694611	694676	P75063	SV	INS	homozygous
Ca21chr7_C_albicans_SC5314	718157	718497	P75063	SV	DEL	homozygous
Ca21chr7_C_albicans_SC5314	719721	720091	P75063	SV	DEL	heterozygous
Ca21chr7_C_albicans_SC5314	723767	724555	P75063	SV	DEL	heterozygous
Ca21chr7_C_albicans_SC5314	779146	779623	P75063	SV	DEL	homozygous
Ca21chr7_C_albicans_SC5314	791682	791897	P75063	SV	INS	heterozygous
Ca21chr7_C_albicans_SC5314	811306	811693	P75063	SV	INS	heterozygous
Ca21chr7_C_albicans_SC5314	830277	830308	P75063	SV	INS	heterozygous
Ca21chr7_C_albicans_SC5314	831484	831517	P75063	SV	INS	homozygous
Ca21chr7_C_albicans_SC5314	833596	833651	P75063	SV	DEL	homozygous
Ca21chr7_C_albicans_SC5314	835134	835918	P75063	SV	DEL	homozygous
Ca21chr7_C_albicans_SC5314	836697	836734	P75063	SV	DEL	homozygous
Ca21chr7_C_albicans_SC5314	838903	838946	P75063	SV	DEL	homozygous
Ca21chr7_C_albicans_SC5314	885245	885325	P75063	SV	DEL	homozygous
Ca21chr7_C_albicans_SC5314	942424	942429	P75063	SV	BND	heterozygous
Ca21chrR_C_albicans_SC5314	207664	207706	P75063	SV	INS	homozygous
Ca21chrR_C_albicans_SC5314	210580	215732	P75063	SV	DEL	homozygous
Ca21chrR_C_albicans_SC5314	217069	217103	P75063	SV	DEL	heterozygous
Ca21chrR_C_albicans_SC5314	226761	226805	P75063	SV	DEL	homozygous
Ca21chrR_C_albicans_SC5314	230996	231476	P75063	SV	INS	homozygous
Ca21chrR_C_albicans_SC5314	289536	289567	P75063	SV	INS	homozygous
Ca21chrR_C_albicans_SC5314	296039	296078	P75063	SV	INS	heterozygous
Ca21chrR_C_albicans_SC5314	306609	306658	P75063	SV	DEL	homozygous
Ca21chrR_C_albicans_SC5314	345126	345416	P75063	SV	INS	heterozygous
Ca21chrR_C_albicans_SC5314	347652	347720	P75063	SV	INS	heterozygous
Ca21chrR_C_albicans_SC5314	417889	441652	P75063	SV	INV	heterozygous
Ca21chrR_C_albicans_SC5314	420400	420913	P75063	SV	INS	heterozygous
Ca21chrR_C_albicans_SC5314	441626	441679	P75063	SV	INS	homozygous
Ca21chrR_C_albicans_SC5314	452132	452202	P75063	SV	DEL	homozygous
Ca21chrR_C_albicans_SC5314	455702	455739	P75063	SV	DEL	heterozygous
Ca21chrR_C_albicans_SC5314	456796	456843	P75063	SV	INS	heterozygous
Ca21chrR_C_albicans_SC5314	463315	463599	P75063	SV	INS	heterozygous
Ca21chrR_C_albicans_SC5314	498252	498536	P75063	SV	INS	heterozygous
Ca21chrR_C_albicans_SC5314	510934	510968	P75063	SV	DEL	heterozygous
Ca21chrR_C_albicans_SC5314	538658	538942	P75063	SV	INS	heterozygous
Ca21chrR_C_albicans_SC5314	552695	552727	P75063	SV	DEL	homozygous
Ca21chrR_C_albicans_SC5314	602772	602805	P75063	SV	INS	homozygous
Ca21chrR_C_albicans_SC5314	611819	611885	P75063	SV	INS	heterozygous
Ca21chrR_C_albicans_SC5314	613003	613028	P75063	SV	DEL	heterozygous
Ca21chrR_C_albicans_SC5314	625614	625737	P75063	SV	INS	homozygous
Ca21chrR_C_albicans_SC5314	625680	626194	P75063	SV	DEL	heterozygous
Ca21chrR_C_albicans_SC5314	651677	651725	P75063	SV	DEL	homozygous
Ca21chrR_C_albicans_SC5314	675282	675373	P75063	SV	DEL	heterozygous
Ca21chrR_C_albicans_SC5314	724275	724321	P75063	SV	DEL	heterozygous
Ca21chrR_C_albicans_SC5314	842841	843127	P75063	SV	INS	heterozygous
Ca21chrR_C_albicans_SC5314	879272	879303	P75063	SV	DEL	heterozygous
Ca21chrR_C_albicans_SC5314	887182	887214	P75063	SV	DEL	homozygous
Ca21chrR_C_albicans_SC5314	961458	961852	P75063	SV	DEL	homozygous
Ca21chrR_C_albicans_SC5314	993811	994202	P75063	SV	INS	heterozygous
Ca21chrR_C_albicans_SC5314	1047656	1047941	P75063	SV	INS	heterozygous
Ca21chrR_C_albicans_SC5314	1062957	1063008	P75063	SV	INS	homozygous
Ca21chrR_C_albicans_SC5314	1066067	1066118	P75063	SV	DEL	heterozygous
Ca21chrR_C_albicans_SC5314	1075498	1075535	P75063	SV	INS	homozygous
Ca21chrR_C_albicans_SC5314	1092331	1092845	P75063	SV	INS	heterozygous
Ca21chrR_C_albicans_SC5314	1097840	1098354	P75063	SV	DEL	homozygous
Ca21chrR_C_albicans_SC5314	1099032	1100015	P75063	SV	INS	homozygous
Ca21chrR_C_albicans_SC5314	1109276	1110062	P75063	SV	DEL	homozygous
Ca21chrR_C_albicans_SC5314	1109282	1109287	P75063	SV	BND	heterozygous
Ca21chrR_C_albicans_SC5314	1129042	1134797	P75063	SV	DEL	homozygous
Ca21chrR_C_albicans_SC5314	1270813	1270847	P75063	SV	DEL	heterozygous
Ca21chrR_C_albicans_SC5314	1293083	1293594	P75063	SV	INS	heterozygous
Ca21chrR_C_albicans_SC5314	1293084	1293089	P75063	SV	BND	heterozygous
Ca21chrR_C_albicans_SC5314	1310550	1310952	P75063	SV	DEL	homozygous
Ca21chrR_C_albicans_SC5314	1346141	1346173	P75063	SV	DEL	homozygous
Ca21chrR_C_albicans_SC5314	1352927	1353101	P75063	SV	INS	homozygous
Ca21chrR_C_albicans_SC5314	1353198	1353375	P75063	SV	INS	homozygous
Ca21chrR_C_albicans_SC5314	1396762	1396796	P75063	SV	DEL	homozygous
Ca21chrR_C_albicans_SC5314	1405342	1405492	P75063	SV	INS	heterozygous
Ca21chrR_C_albicans_SC5314	1412347	1412379	P75063	SV	DEL	heterozygous
Ca21chrR_C_albicans_SC5314	1416406	1416440	P75063	SV	INS	heterozygous
Ca21chrR_C_albicans_SC5314	1479833	1479909	P75063	SV	DEL	homozygous
Ca21chrR_C_albicans_SC5314	1539635	1539677	P75063	SV	INS	homozygous
Ca21chrR_C_albicans_SC5314	1585327	1585644	P75063	SV	DEL	homozygous
Ca21chrR_C_albicans_SC5314	1611180	1611717	P75063	SV	DEL	homozygous
Ca21chrR_C_albicans_SC5314	1647591	1647628	P75063	SV	INS	homozygous
Ca21chrR_C_albicans_SC5314	1650820	1651295	P75063	SV	INS	homozygous
Ca21chrR_C_albicans_SC5314	1690421	1690932	P75063	SV	INS	homozygous
Ca21chrR_C_albicans_SC5314	1690422	1690427	P75063	SV	BND	heterozygous
Ca21chrR_C_albicans_SC5314	1690423	1690428	P75063	SV	BND	homozygous
Ca21chrR_C_albicans_SC5314	1704721	1705233	P75063	SV	INS	heterozygous
Ca21chrR_C_albicans_SC5314	1704727	1704732	P75063	SV	BND	homozygous
Ca21chrR_C_albicans_SC5314	1712205	1712273	P75063	SV	INS	homozygous
Ca21chrR_C_albicans_SC5314	1787371	1787882	P75063	SV	INS	heterozygous
Ca21chrR_C_albicans_SC5314	1789857	1789896	P75063	SV	INS	homozygous
Ca21chrR_C_albicans_SC5314	1813328	1813911	P75063	SV	INS	homozygous
Ca21chrR_C_albicans_SC5314	1874870	1875321	P75063	SV	INS	heterozygous
Ca21chrR_C_albicans_SC5314	1883316	1883834	P75063	SV	INS	heterozygous
Ca21chrR_C_albicans_SC5314	1884208	1887227	P75063	SV	DEL	homozygous
Ca21chrR_C_albicans_SC5314	1884650	1897363	P75063	SV	DUP	heterozygous
Ca21chrR_C_albicans_SC5314	1886270	1886338	P75063	SV	DEL	heterozygous
Ca21chrR_C_albicans_SC5314	1888691	1888847	P75063	SV	INS	homozygous
Ca21chrR_C_albicans_SC5314	1890807	1890830	P75063	SV	DEL	homozygous
Ca21chrR_C_albicans_SC5314	1891604	1891637	P75063	SV	DEL	homozygous
Ca21chrR_C_albicans_SC5314	1892351	1892394	P75063	SV	DEL	homozygous
Ca21chrR_C_albicans_SC5314	1892476	1892560	P75063	SV	INS	homozygous
Ca21chrR_C_albicans_SC5314	1892854	1892889	P75063	SV	DEL	homozygous
Ca21chrR_C_albicans_SC5314	1895863	1896242	P75063	SV	INS	heterozygous
Ca21chrR_C_albicans_SC5314	1896289	1896381	P75063	SV	INS	homozygous
Ca21chrR_C_albicans_SC5314	1924219	1924696	P75063	SV	DEL	homozygous
Ca21chrR_C_albicans_SC5314	1947298	1947583	P75063	SV	DEL	homozygous
Ca21chrR_C_albicans_SC5314	2019278	2019363	P75063	SV	DEL	homozygous
Ca21chrR_C_albicans_SC5314	2034390	2034446	P75063	SV	DEL	homozygous
Ca21chrR_C_albicans_SC5314	2051522	2051564	P75063	SV	INS	homozygous
Ca21chrR_C_albicans_SC5314	2052360	2052409	P75063	SV	DEL	homozygous
Ca21chrR_C_albicans_SC5314	2067817	2067850	P75063	SV	INS	heterozygous
Ca21chrR_C_albicans_SC5314	2169274	2169617	P75063	SV	DEL	homozygous
Ca21chrR_C_albicans_SC5314	2182307	2182783	P75063	SV	DEL	homozygous
Ca21chrR_C_albicans_SC5314	2243677	2244072	P75063	SV	DEL	homozygous
Ca21chr1_C_albicans_SC5314	42180	46167	SC5314	SV	DEL	heterozygous
Ca21chr1_C_albicans_SC5314	141345	141381	SC5314	SV	DEL	heterozygous
Ca21chr1_C_albicans_SC5314	215175	215280	SC5314	SV	INS	homozygous
Ca21chr1_C_albicans_SC5314	277085	277402	SC5314	SV	DEL	heterozygous
Ca21chr1_C_albicans_SC5314	280126	280328	SC5314	SV	DEL	heterozygous
Ca21chr1_C_albicans_SC5314	295688	295728	SC5314	SV	INS	heterozygous
Ca21chr1_C_albicans_SC5314	354216	354614	SC5314	SV	INS	heterozygous
Ca21chr1_C_albicans_SC5314	388932	388987	SC5314	SV	DEL	homozygous
Ca21chr1_C_albicans_SC5314	403868	404262	SC5314	SV	DEL	heterozygous
Ca21chr1_C_albicans_SC5314	428983	429015	SC5314	SV	DEL	heterozygous
Ca21chr1_C_albicans_SC5314	468047	468136	SC5314	SV	DEL	heterozygous
Ca21chr1_C_albicans_SC5314	536670	537069	SC5314	SV	DEL	heterozygous
Ca21chr1_C_albicans_SC5314	619990	620053	SC5314	SV	INS	homozygous
Ca21chr1_C_albicans_SC5314	641835	641887	SC5314	SV	DEL	heterozygous
Ca21chr1_C_albicans_SC5314	802530	802575	SC5314	SV	INS	homozygous
Ca21chr1_C_albicans_SC5314	804264	804301	SC5314	SV	DEL	heterozygous
Ca21chr1_C_albicans_SC5314	811820	812104	SC5314	SV	INS	heterozygous
Ca21chr1_C_albicans_SC5314	825362	825463	SC5314	SV	INS	heterozygous
Ca21chr1_C_albicans_SC5314	837533	837573	SC5314	SV	DEL	heterozygous
Ca21chr1_C_albicans_SC5314	842340	842374	SC5314	SV	DEL	heterozygous
Ca21chr1_C_albicans_SC5314	859263	859299	SC5314	SV	DEL	homozygous
Ca21chr1_C_albicans_SC5314	874011	874042	SC5314	SV	INS	homozygous
Ca21chr1_C_albicans_SC5314	878313	878848	SC5314	SV	INS	heterozygous
Ca21chr1_C_albicans_SC5314	918069	921417	SC5314	SV	INS	heterozygous
Ca21chr1_C_albicans_SC5314	991777	991832	SC5314	SV	INS	homozygous
Ca21chr1_C_albicans_SC5314	1023333	1023515	SC5314	SV	INS	heterozygous
Ca21chr1_C_albicans_SC5314	1036650	1036682	SC5314	SV	INS	heterozygous
Ca21chr1_C_albicans_SC5314	1047822	1047856	SC5314	SV	DEL	heterozygous
Ca21chr1_C_albicans_SC5314	1054949	1055235	SC5314	SV	DEL	heterozygous
Ca21chr1_C_albicans_SC5314	1151485	1151607	SC5314	SV	INS	homozygous
Ca21chr1_C_albicans_SC5314	1255867	1255884	SC5314	SV	INS	homozygous
Ca21chr1_C_albicans_SC5314	1263727	1263759	SC5314	SV	DEL	heterozygous
Ca21chr1_C_albicans_SC5314	1335132	1335348	SC5314	SV	DEL	heterozygous
Ca21chr1_C_albicans_SC5314	1337337	1337483	SC5314	SV	DEL	heterozygous
Ca21chr1_C_albicans_SC5314	1347690	1347724	SC5314	SV	DEL	heterozygous
Ca21chr1_C_albicans_SC5314	1390658	1390707	SC5314	SV	DEL	heterozygous
Ca21chr1_C_albicans_SC5314	1523704	1523994	SC5314	SV	INS	heterozygous
Ca21chr1_C_albicans_SC5314	1535223	1535260	SC5314	SV	INS	homozygous
Ca21chr1_C_albicans_SC5314	1539137	1539202	SC5314	SV	INS	homozygous
Ca21chr1_C_albicans_SC5314	1573149	1573227	SC5314	SV	INS	homozygous
Ca21chr1_C_albicans_SC5314	1581068	1586217	SC5314	SV	INS	heterozygous
Ca21chr1_C_albicans_SC5314	1633022	1633136	SC5314	SV	INS	heterozygous
Ca21chr1_C_albicans_SC5314	1650310	1650356	SC5314	SV	DEL	heterozygous
Ca21chr1_C_albicans_SC5314	1653861	1654014	SC5314	SV	INS	heterozygous
Ca21chr1_C_albicans_SC5314	1654153	1654188	SC5314	SV	INS	heterozygous
Ca21chr1_C_albicans_SC5314	1656724	1656848	SC5314	SV	DEL	homozygous
Ca21chr1_C_albicans_SC5314	1688624	1688967	SC5314	SV	DEL	heterozygous
Ca21chr1_C_albicans_SC5314	1695453	1695485	SC5314	SV	INS	homozygous
Ca21chr1_C_albicans_SC5314	1739487	1739530	SC5314	SV	DEL	heterozygous
Ca21chr1_C_albicans_SC5314	1749356	1749422	SC5314	SV	INS	heterozygous
Ca21chr1_C_albicans_SC5314	1808025	1808230	SC5314	SV	DEL	heterozygous
Ca21chr1_C_albicans_SC5314	1815245	1815530	SC5314	SV	DEL	heterozygous
Ca21chr1_C_albicans_SC5314	1902457	1902969	SC5314	SV	DEL	heterozygous
Ca21chr1_C_albicans_SC5314	1935734	1936016	SC5314	SV	DEL	heterozygous
Ca21chr1_C_albicans_SC5314	1960969	1961018	SC5314	SV	DEL	heterozygous
Ca21chr1_C_albicans_SC5314	1966989	1967057	SC5314	SV	INS	heterozygous
Ca21chr1_C_albicans_SC5314	1970076	1970149	SC5314	SV	DEL	heterozygous
Ca21chr1_C_albicans_SC5314	1985652	1986044	SC5314	SV	INS	heterozygous
Ca21chr1_C_albicans_SC5314	2052130	2052202	SC5314	SV	INS	homozygous
Ca21chr1_C_albicans_SC5314	2099351	2099758	SC5314	SV	INS	heterozygous
Ca21chr1_C_albicans_SC5314	2129760	2129835	SC5314	SV	INS	homozygous
Ca21chr1_C_albicans_SC5314	2164393	2164792	SC5314	SV	INS	heterozygous
Ca21chr1_C_albicans_SC5314	2180103	2180143	SC5314	SV	DEL	heterozygous
Ca21chr1_C_albicans_SC5314	2187468	2189622	SC5314	SV	INS	heterozygous
Ca21chr1_C_albicans_SC5314	2255368	2255724	SC5314	SV	INS	heterozygous
Ca21chr1_C_albicans_SC5314	2348380	2348920	SC5314	SV	INS	heterozygous
Ca21chr1_C_albicans_SC5314	2467332	2467380	SC5314	SV	INS	homozygous
Ca21chr1_C_albicans_SC5314	2473360	2473394	SC5314	SV	INS	homozygous
Ca21chr1_C_albicans_SC5314	2475986	2476022	SC5314	SV	INS	heterozygous
Ca21chr1_C_albicans_SC5314	2539036	2539067	SC5314	SV	INS	homozygous
Ca21chr1_C_albicans_SC5314	2557782	2558074	SC5314	SV	INS	heterozygous
Ca21chr1_C_albicans_SC5314	2718528	2727817	SC5314	SV	INS	heterozygous
Ca21chr1_C_albicans_SC5314	2746528	2746614	SC5314	SV	INS	homozygous
Ca21chr1_C_albicans_SC5314	2747297	2747330	SC5314	SV	DEL	heterozygous
Ca21chr1_C_albicans_SC5314	2776151	2776407	SC5314	SV	INS	heterozygous
Ca21chr1_C_albicans_SC5314	2803408	2803692	SC5314	SV	INS	heterozygous
Ca21chr1_C_albicans_SC5314	2807246	2807317	SC5314	SV	INS	homozygous
Ca21chr1_C_albicans_SC5314	2854704	2854905	SC5314	SV	DEL	heterozygous
Ca21chr1_C_albicans_SC5314	2887181	2887401	SC5314	SV	DEL	heterozygous
Ca21chr1_C_albicans_SC5314	2896469	2896557	SC5314	SV	INS	heterozygous
Ca21chr1_C_albicans_SC5314	2898406	2898438	SC5314	SV	INS	heterozygous
Ca21chr1_C_albicans_SC5314	2910779	2911065	SC5314	SV	DEL	heterozygous
Ca21chr1_C_albicans_SC5314	2914688	2914722	SC5314	SV	DEL	heterozygous
Ca21chr1_C_albicans_SC5314	2919182	2919215	SC5314	SV	INS	heterozygous
Ca21chr1_C_albicans_SC5314	2924659	2924908	SC5314	SV	INS	heterozygous
Ca21chr1_C_albicans_SC5314	2946564	2946600	SC5314	SV	INS	heterozygous
Ca21chr1_C_albicans_SC5314	2963204	2963236	SC5314	SV	DEL	heterozygous
Ca21chr1_C_albicans_SC5314	2998942	2998975	SC5314	SV	INS	homozygous
Ca21chr1_C_albicans_SC5314	3056305	3056364	SC5314	SV	INS	homozygous
Ca21chr1_C_albicans_SC5314	3098772	3098902	SC5314	SV	INS	homozygous
Ca21chr1_C_albicans_SC5314	3180785	3180836	SC5314	SV	INS	homozygous
Ca21chr2_C_albicans_SC5314	42062	44326	SC5314	SV	INS	heterozygous
Ca21chr2_C_albicans_SC5314	68464	68498	SC5314	SV	INS	homozygous
Ca21chr2_C_albicans_SC5314	126950	126982	SC5314	SV	INS	homozygous
Ca21chr2_C_albicans_SC5314	167360	167395	SC5314	SV	DEL	heterozygous
Ca21chr2_C_albicans_SC5314	189678	189890	SC5314	SV	INS	heterozygous
Ca21chr2_C_albicans_SC5314	216679	216879	SC5314	SV	DEL	heterozygous
Ca21chr2_C_albicans_SC5314	234628	234660	SC5314	SV	DEL	homozygous
Ca21chr2_C_albicans_SC5314	317460	317492	SC5314	SV	INS	homozygous
Ca21chr2_C_albicans_SC5314	338190	338224	SC5314	SV	DEL	homozygous
Ca21chr2_C_albicans_SC5314	353437	353471	SC5314	SV	DEL	homozygous
Ca21chr2_C_albicans_SC5314	354565	354610	SC5314	SV	INS	heterozygous
Ca21chr2_C_albicans_SC5314	371998	372032	SC5314	SV	DEL	heterozygous
Ca21chr2_C_albicans_SC5314	379436	379470	SC5314	SV	DEL	heterozygous
Ca21chr2_C_albicans_SC5314	409873	409926	SC5314	SV	INS	homozygous
Ca21chr2_C_albicans_SC5314	424834	424887	SC5314	SV	DEL	heterozygous
Ca21chr2_C_albicans_SC5314	430986	433606	SC5314	SV	INS	heterozygous
Ca21chr2_C_albicans_SC5314	434825	434852	SC5314	SV	INS	homozygous
Ca21chr2_C_albicans_SC5314	443493	443592	SC5314	SV	INS	homozygous
Ca21chr2_C_albicans_SC5314	448526	448775	SC5314	SV	INS	heterozygous
Ca21chr2_C_albicans_SC5314	481269	486998	SC5314	SV	INS	heterozygous
Ca21chr2_C_albicans_SC5314	496363	496613	SC5314	SV	DEL	heterozygous
Ca21chr2_C_albicans_SC5314	520880	521171	SC5314	SV	INS	heterozygous
Ca21chr2_C_albicans_SC5314	529385	529512	SC5314	SV	INS	homozygous
Ca21chr2_C_albicans_SC5314	541310	541342	SC5314	SV	INS	homozygous
Ca21chr2_C_albicans_SC5314	623503	623565	SC5314	SV	INS	homozygous
Ca21chr2_C_albicans_SC5314	663079	663249	SC5314	SV	INS	heterozygous
Ca21chr2_C_albicans_SC5314	671379	671931	SC5314	SV	DEL	heterozygous
Ca21chr2_C_albicans_SC5314	682201	682294	SC5314	SV	INS	homozygous
Ca21chr2_C_albicans_SC5314	718190	718272	SC5314	SV	INS	homozygous
Ca21chr2_C_albicans_SC5314	719725	719767	SC5314	SV	INS	heterozygous
Ca21chr2_C_albicans_SC5314	734875	735248	SC5314	SV	DEL	heterozygous
Ca21chr2_C_albicans_SC5314	737648	737698	SC5314	SV	INS	heterozygous
Ca21chr2_C_albicans_SC5314	738585	739098	SC5314	SV	INS	heterozygous
Ca21chr2_C_albicans_SC5314	749690	750229	SC5314	SV	INS	heterozygous
Ca21chr2_C_albicans_SC5314	771048	771087	SC5314	SV	DEL	heterozygous
Ca21chr2_C_albicans_SC5314	775753	775808	SC5314	SV	INS	homozygous
Ca21chr2_C_albicans_SC5314	795810	795859	SC5314	SV	INS	homozygous
Ca21chr2_C_albicans_SC5314	870413	870536	SC5314	SV	INS	homozygous
Ca21chr2_C_albicans_SC5314	883311	883420	SC5314	SV	DEL	homozygous
Ca21chr2_C_albicans_SC5314	954588	954668	SC5314	SV	INS	homozygous
Ca21chr2_C_albicans_SC5314	972038	972072	SC5314	SV	DEL	homozygous
Ca21chr2_C_albicans_SC5314	1002762	1002817	SC5314	SV	DEL	heterozygous
Ca21chr2_C_albicans_SC5314	1008436	1008484	SC5314	SV	INS	heterozygous
Ca21chr2_C_albicans_SC5314	1012410	1012886	SC5314	SV	DEL	heterozygous
Ca21chr2_C_albicans_SC5314	1026364	1026876	SC5314	SV	INS	heterozygous
Ca21chr2_C_albicans_SC5314	1032147	1032182	SC5314	SV	INS	homozygous
Ca21chr2_C_albicans_SC5314	1042516	1042614	SC5314	SV	INS	heterozygous
Ca21chr2_C_albicans_SC5314	1048101	1048133	SC5314	SV	INS	homozygous
Ca21chr2_C_albicans_SC5314	1053345	1053391	SC5314	SV	DEL	heterozygous
Ca21chr2_C_albicans_SC5314	1125289	1125328	SC5314	SV	INS	homozygous
Ca21chr2_C_albicans_SC5314	1189097	1189415	SC5314	SV	INS	heterozygous
Ca21chr2_C_albicans_SC5314	1191167	1191225	SC5314	SV	INS	homozygous
Ca21chr2_C_albicans_SC5314	1206240	1206271	SC5314	SV	INS	heterozygous
Ca21chr2_C_albicans_SC5314	1210165	1210214	SC5314	SV	INS	homozygous
Ca21chr2_C_albicans_SC5314	1219012	1219055	SC5314	SV	DEL	heterozygous
Ca21chr2_C_albicans_SC5314	1230419	1230474	SC5314	SV	INS	homozygous
Ca21chr2_C_albicans_SC5314	1286401	1286476	SC5314	SV	INS	homozygous
Ca21chr2_C_albicans_SC5314	1302074	1302276	SC5314	SV	DEL	heterozygous
Ca21chr2_C_albicans_SC5314	1330690	1330732	SC5314	SV	INS	homozygous
Ca21chr2_C_albicans_SC5314	1363989	1364063	SC5314	SV	DEL	heterozygous
Ca21chr2_C_albicans_SC5314	1369014	1369489	SC5314	SV	INS	heterozygous
Ca21chr2_C_albicans_SC5314	1371771	1371810	SC5314	SV	INS	heterozygous
Ca21chr2_C_albicans_SC5314	1406423	1406460	SC5314	SV	DEL	heterozygous
Ca21chr2_C_albicans_SC5314	1416906	1417189	SC5314	SV	DEL	heterozygous
Ca21chr2_C_albicans_SC5314	1430445	1430477	SC5314	SV	DEL	homozygous
Ca21chr2_C_albicans_SC5314	1459308	1459634	SC5314	SV	DEL	heterozygous
Ca21chr2_C_albicans_SC5314	1467740	1467801	SC5314	SV	INS	homozygous
Ca21chr2_C_albicans_SC5314	1557586	1562152	SC5314	SV	INS	heterozygous
Ca21chr2_C_albicans_SC5314	1557587	1665235	SC5314	SV	INV	heterozygous
Ca21chr2_C_albicans_SC5314	1562388	1562446	SC5314	SV	INS	homozygous
Ca21chr2_C_albicans_SC5314	1675858	1676142	SC5314	SV	INS	heterozygous
Ca21chr2_C_albicans_SC5314	1684198	1684482	SC5314	SV	INS	heterozygous
Ca21chr2_C_albicans_SC5314	1742714	1742741	SC5314	SV	INS	homozygous
Ca21chr2_C_albicans_SC5314	1750875	1750918	SC5314	SV	DEL	heterozygous
Ca21chr2_C_albicans_SC5314	1770613	1770646	SC5314	SV	INS	heterozygous
Ca21chr2_C_albicans_SC5314	1781926	1782028	SC5314	SV	INS	heterozygous
Ca21chr2_C_albicans_SC5314	1815263	1815316	SC5314	SV	INS	homozygous
Ca21chr2_C_albicans_SC5314	1827186	1827316	SC5314	SV	INS	homozygous
Ca21chr2_C_albicans_SC5314	1835336	1835436	SC5314	SV	INS	homozygous
Ca21chr2_C_albicans_SC5314	1915431	1917234	SC5314	SV	INS	heterozygous
Ca21chr2_C_albicans_SC5314	1932952	1932989	SC5314	SV	DEL	heterozygous
Ca21chr2_C_albicans_SC5314	1951765	1953024	SC5314	SV	INS	heterozygous
Ca21chr2_C_albicans_SC5314	1952348	1952408	SC5314	SV	INS	homozygous
Ca21chr2_C_albicans_SC5314	1952586	1952729	SC5314	SV	INS	homozygous
Ca21chr2_C_albicans_SC5314	1952718	1952801	SC5314	SV	INS	homozygous
Ca21chr2_C_albicans_SC5314	1959144	1959176	SC5314	SV	DEL	homozygous
Ca21chr2_C_albicans_SC5314	1982620	1982653	SC5314	SV	DEL	heterozygous
Ca21chr2_C_albicans_SC5314	2083224	2083333	SC5314	SV	INS	heterozygous
Ca21chr2_C_albicans_SC5314	2086422	2086486	SC5314	SV	INS	heterozygous
Ca21chr3_C_albicans_SC5314	913	1092	SC5314	SV	DEL	heterozygous
Ca21chr3_C_albicans_SC5314	1345	10218	SC5314	SV	DUP	homozygous
Ca21chr3_C_albicans_SC5314	9664	9696	SC5314	SV	DEL	heterozygous
Ca21chr3_C_albicans_SC5314	10218	10223	SC5314	SV	BND	heterozygous
Ca21chr3_C_albicans_SC5314	10436	10471	SC5314	SV	INS	heterozygous
Ca21chr3_C_albicans_SC5314	10770	10775	SC5314	SV	BND	heterozygous
Ca21chr3_C_albicans_SC5314	208084	208114	SC5314	SV	INS	homozygous
Ca21chr3_C_albicans_SC5314	230981	231024	SC5314	SV	INS	heterozygous
Ca21chr3_C_albicans_SC5314	234672	234819	SC5314	SV	DEL	homozygous
Ca21chr3_C_albicans_SC5314	307943	307978	SC5314	SV	DEL	homozygous
Ca21chr3_C_albicans_SC5314	367101	367141	SC5314	SV	INS	heterozygous
Ca21chr3_C_albicans_SC5314	401267	401658	SC5314	SV	INS	heterozygous
Ca21chr3_C_albicans_SC5314	478237	478405	SC5314	SV	DEL	heterozygous
Ca21chr3_C_albicans_SC5314	522369	522424	SC5314	SV	DEL	heterozygous
Ca21chr3_C_albicans_SC5314	524650	524699	SC5314	SV	DEL	heterozygous
Ca21chr3_C_albicans_SC5314	526819	526850	SC5314	SV	INS	homozygous
Ca21chr3_C_albicans_SC5314	528630	528662	SC5314	SV	DEL	homozygous
Ca21chr3_C_albicans_SC5314	530087	530121	SC5314	SV	DEL	homozygous
Ca21chr3_C_albicans_SC5314	566737	566822	SC5314	SV	INS	heterozygous
Ca21chr3_C_albicans_SC5314	574643	574791	SC5314	SV	INS	heterozygous
Ca21chr3_C_albicans_SC5314	597222	597460	SC5314	SV	DEL	heterozygous
Ca21chr3_C_albicans_SC5314	601114	601589	SC5314	SV	INS	heterozygous
Ca21chr3_C_albicans_SC5314	644866	645602	SC5314	SV	INS	homozygous
Ca21chr3_C_albicans_SC5314	661108	661195	SC5314	SV	INS	homozygous
Ca21chr3_C_albicans_SC5314	684056	684268	SC5314	SV	INS	heterozygous
Ca21chr3_C_albicans_SC5314	703166	703562	SC5314	SV	INS	heterozygous
Ca21chr3_C_albicans_SC5314	709607	709677	SC5314	SV	INS	homozygous
Ca21chr3_C_albicans_SC5314	783202	783247	SC5314	SV	INS	homozygous
Ca21chr3_C_albicans_SC5314	794642	794714	SC5314	SV	INS	homozygous
Ca21chr3_C_albicans_SC5314	856436	858591	SC5314	SV	INS	heterozygous
Ca21chr3_C_albicans_SC5314	861261	861319	SC5314	SV	INS	homozygous
Ca21chr3_C_albicans_SC5314	888786	888819	SC5314	SV	INS	homozygous
Ca21chr3_C_albicans_SC5314	888900	888930	SC5314	SV	INS	homozygous
Ca21chr3_C_albicans_SC5314	892833	892992	SC5314	SV	INS	heterozygous
Ca21chr3_C_albicans_SC5314	941619	941724	SC5314	SV	INS	homozygous
Ca21chr3_C_albicans_SC5314	942287	942342	SC5314	SV	INS	homozygous
Ca21chr3_C_albicans_SC5314	1007706	1007823	SC5314	SV	INS	homozygous
Ca21chr3_C_albicans_SC5314	1098916	1098976	SC5314	SV	INS	homozygous
Ca21chr3_C_albicans_SC5314	1166976	1167129	SC5314	SV	INS	homozygous
Ca21chr3_C_albicans_SC5314	1199745	1199831	SC5314	SV	INS	homozygous
Ca21chr3_C_albicans_SC5314	1231864	1231933	SC5314	SV	INS	homozygous
Ca21chr3_C_albicans_SC5314	1404160	1405359	SC5314	SV	INS	homozygous
Ca21chr3_C_albicans_SC5314	1646962	1646967	SC5314	SV	BND	homozygous
Ca21chr3_C_albicans_SC5314	1788668	1788926	SC5314	SV	DEL	heterozygous
Ca21chr3_C_albicans_SC5314	1791538	1791961	SC5314	SV	INS	heterozygous
Ca21chr4_C_albicans_SC5314	553	790	SC5314	SV	INS	homozygous
Ca21chr4_C_albicans_SC5314	1300	1375	SC5314	SV	INS	homozygous
Ca21chr4_C_albicans_SC5314	49252	49297	SC5314	SV	INS	homozygous
Ca21chr4_C_albicans_SC5314	164278	166605	SC5314	SV	INS	heterozygous
Ca21chr4_C_albicans_SC5314	197642	197673	SC5314	SV	DEL	heterozygous
Ca21chr4_C_albicans_SC5314	204407	204503	SC5314	SV	INS	heterozygous
Ca21chr4_C_albicans_SC5314	207558	207811	SC5314	SV	DEL	heterozygous
Ca21chr4_C_albicans_SC5314	209233	209274	SC5314	SV	INS	heterozygous
Ca21chr4_C_albicans_SC5314	266294	266348	SC5314	SV	INS	heterozygous
Ca21chr4_C_albicans_SC5314	297369	297412	SC5314	SV	DEL	heterozygous
Ca21chr4_C_albicans_SC5314	321721	322040	SC5314	SV	INS	heterozygous
Ca21chr4_C_albicans_SC5314	374177	378504	SC5314	SV	INS	heterozygous
Ca21chr4_C_albicans_SC5314	413811	414502	SC5314	SV	INS	heterozygous
Ca21chr4_C_albicans_SC5314	511029	511067	SC5314	SV	DEL	heterozygous
Ca21chr4_C_albicans_SC5314	512215	512728	SC5314	SV	INS	heterozygous
Ca21chr4_C_albicans_SC5314	526740	526779	SC5314	SV	INS	heterozygous
Ca21chr4_C_albicans_SC5314	562482	562734	SC5314	SV	INS	heterozygous
Ca21chr4_C_albicans_SC5314	585843	586329	SC5314	SV	DEL	heterozygous
Ca21chr4_C_albicans_SC5314	637131	637645	SC5314	SV	DEL	heterozygous
Ca21chr4_C_albicans_SC5314	637138	637143	SC5314	SV	BND	homozygous
Ca21chr4_C_albicans_SC5314	637644	637649	SC5314	SV	BND	homozygous
Ca21chr4_C_albicans_SC5314	673946	680848	SC5314	SV	DEL	heterozygous
Ca21chr4_C_albicans_SC5314	697404	697456	SC5314	SV	INS	homozygous
Ca21chr4_C_albicans_SC5314	738872	738903	SC5314	SV	DEL	homozygous
Ca21chr4_C_albicans_SC5314	745631	745718	SC5314	SV	INS	heterozygous
Ca21chr4_C_albicans_SC5314	745982	746313	SC5314	SV	DEL	heterozygous
Ca21chr4_C_albicans_SC5314	843805	844008	SC5314	SV	DEL	heterozygous
Ca21chr4_C_albicans_SC5314	900301	900361	SC5314	SV	INS	homozygous
Ca21chr4_C_albicans_SC5314	946367	946429	SC5314	SV	INS	homozygous
Ca21chr4_C_albicans_SC5314	947373	947471	SC5314	SV	INS	homozygous
Ca21chr4_C_albicans_SC5314	990182	990243	SC5314	SV	INS	homozygous
Ca21chr4_C_albicans_SC5314	1070565	1070634	SC5314	SV	INS	homozygous
Ca21chr4_C_albicans_SC5314	1077976	1078008	SC5314	SV	INS	homozygous
Ca21chr4_C_albicans_SC5314	1134737	1134801	SC5314	SV	DEL	heterozygous
Ca21chr4_C_albicans_SC5314	1178664	1179179	SC5314	SV	DEL	heterozygous
Ca21chr4_C_albicans_SC5314	1193917	1194119	SC5314	SV	DEL	heterozygous
Ca21chr4_C_albicans_SC5314	1201739	1202256	SC5314	SV	DEL	heterozygous
Ca21chr4_C_albicans_SC5314	1262679	1262876	SC5314	SV	DEL	heterozygous
Ca21chr4_C_albicans_SC5314	1290405	1290505	SC5314	SV	INS	homozygous
Ca21chr4_C_albicans_SC5314	1296749	1296786	SC5314	SV	DEL	heterozygous
Ca21chr4_C_albicans_SC5314	1441284	1441315	SC5314	SV	INS	homozygous
Ca21chr4_C_albicans_SC5314	1443898	1443952	SC5314	SV	DEL	homozygous
Ca21chr4_C_albicans_SC5314	1443898	1443984	SC5314	SV	DEL	homozygous
Ca21chr4_C_albicans_SC5314	1449442	1449475	SC5314	SV	INS	homozygous
Ca21chr4_C_albicans_SC5314	1493003	1493057	SC5314	SV	INS	homozygous
Ca21chr4_C_albicans_SC5314	1503534	1503609	SC5314	SV	DEL	heterozygous
Ca21chr4_C_albicans_SC5314	1566724	1567133	SC5314	SV	INS	heterozygous
Ca21chr4_C_albicans_SC5314	1598554	1598559	SC5314	SV	BND	heterozygous
Ca21chr5_C_albicans_SC5314	11380	11445	SC5314	SV	INS	homozygous
Ca21chr5_C_albicans_SC5314	84261	84314	SC5314	SV	DEL	homozygous
Ca21chr5_C_albicans_SC5314	117971	118252	SC5314	SV	INS	heterozygous
Ca21chr5_C_albicans_SC5314	121090	121411	SC5314	SV	INS	heterozygous
Ca21chr5_C_albicans_SC5314	164286	164329	SC5314	SV	DEL	heterozygous
Ca21chr5_C_albicans_SC5314	187550	187587	SC5314	SV	DEL	heterozygous
Ca21chr5_C_albicans_SC5314	198478	204111	SC5314	SV	INS	heterozygous
Ca21chr5_C_albicans_SC5314	228960	228991	SC5314	SV	INS	homozygous
Ca21chr5_C_albicans_SC5314	280259	280300	SC5314	SV	INS	homozygous
Ca21chr5_C_albicans_SC5314	286654	286956	SC5314	SV	INS	heterozygous
Ca21chr5_C_albicans_SC5314	306613	306866	SC5314	SV	DEL	heterozygous
Ca21chr5_C_albicans_SC5314	345111	345152	SC5314	SV	INS	heterozygous
Ca21chr5_C_albicans_SC5314	369229	369318	SC5314	SV	DEL	heterozygous
Ca21chr5_C_albicans_SC5314	446098	446141	SC5314	SV	INS	homozygous
Ca21chr5_C_albicans_SC5314	466137	466657	SC5314	SV	INS	heterozygous
Ca21chr5_C_albicans_SC5314	469676	470151	SC5314	SV	INS	heterozygous
Ca21chr5_C_albicans_SC5314	490864	490958	SC5314	SV	INS	homozygous
Ca21chr5_C_albicans_SC5314	500704	501180	SC5314	SV	DEL	heterozygous
Ca21chr5_C_albicans_SC5314	534803	535124	SC5314	SV	DEL	heterozygous
Ca21chr5_C_albicans_SC5314	562568	563113	SC5314	SV	INS	heterozygous
Ca21chr5_C_albicans_SC5314	564890	564922	SC5314	SV	DEL	homozygous
Ca21chr5_C_albicans_SC5314	579555	579611	SC5314	SV	INS	homozygous
Ca21chr5_C_albicans_SC5314	610967	611443	SC5314	SV	INS	heterozygous
Ca21chr5_C_albicans_SC5314	644969	645004	SC5314	SV	INS	homozygous
Ca21chr5_C_albicans_SC5314	656800	656831	SC5314	SV	INS	homozygous
Ca21chr5_C_albicans_SC5314	673138	674110	SC5314	SV	INS	homozygous
Ca21chr5_C_albicans_SC5314	676867	676960	SC5314	SV	INS	heterozygous
Ca21chr5_C_albicans_SC5314	720755	720815	SC5314	SV	INS	homozygous
Ca21chr5_C_albicans_SC5314	723948	724339	SC5314	SV	DEL	heterozygous
Ca21chr5_C_albicans_SC5314	724719	724808	SC5314	SV	INS	homozygous
Ca21chr5_C_albicans_SC5314	747031	747088	SC5314	SV	INS	heterozygous
Ca21chr5_C_albicans_SC5314	750444	750471	SC5314	SV	DEL	homozygous
Ca21chr5_C_albicans_SC5314	785380	785431	SC5314	SV	INS	homozygous
Ca21chr5_C_albicans_SC5314	814996	815047	SC5314	SV	INS	homozygous
Ca21chr5_C_albicans_SC5314	871225	871258	SC5314	SV	DEL	heterozygous
Ca21chr5_C_albicans_SC5314	886231	886516	SC5314	SV	INS	heterozygous
Ca21chr5_C_albicans_SC5314	899530	899647	SC5314	SV	INS	homozygous
Ca21chr5_C_albicans_SC5314	965670	965742	SC5314	SV	INS	heterozygous
Ca21chr5_C_albicans_SC5314	972047	972118	SC5314	SV	INS	homozygous
Ca21chr5_C_albicans_SC5314	1036069	1036171	SC5314	SV	INS	homozygous
Ca21chr5_C_albicans_SC5314	1047672	1050416	SC5314	SV	INS	heterozygous
Ca21chr5_C_albicans_SC5314	1086664	1086693	SC5314	SV	DEL	homozygous
Ca21chr5_C_albicans_SC5314	1092892	1092930	SC5314	SV	INS	heterozygous
Ca21chr5_C_albicans_SC5314	1151372	1151396	SC5314	SV	INS	homozygous
Ca21chr5_C_albicans_SC5314	1171753	1172006	SC5314	SV	DEL	heterozygous
Ca21chr6_C_albicans_SC5314	9418	9449	SC5314	SV	DEL	heterozygous
Ca21chr6_C_albicans_SC5314	21995	22047	SC5314	SV	DEL	homozygous
Ca21chr6_C_albicans_SC5314	28684	29469	SC5314	SV	INS	heterozygous
Ca21chr6_C_albicans_SC5314	51934	52073	SC5314	SV	INS	homozygous
Ca21chr6_C_albicans_SC5314	79190	79242	SC5314	SV	DEL	homozygous
Ca21chr6_C_albicans_SC5314	121700	121752	SC5314	SV	DEL	homozygous
Ca21chr6_C_albicans_SC5314	133800	133858	SC5314	SV	INS	homozygous
Ca21chr6_C_albicans_SC5314	162575	162627	SC5314	SV	DEL	homozygous
Ca21chr6_C_albicans_SC5314	173868	174246	SC5314	SV	DEL	heterozygous
Ca21chr6_C_albicans_SC5314	209275	209312	SC5314	SV	DEL	heterozygous
Ca21chr6_C_albicans_SC5314	230867	230949	SC5314	SV	DEL	homozygous
Ca21chr6_C_albicans_SC5314	240359	245425	SC5314	SV	DEL	heterozygous
Ca21chr6_C_albicans_SC5314	260422	260474	SC5314	SV	DEL	homozygous
Ca21chr6_C_albicans_SC5314	273550	273649	SC5314	SV	DEL	heterozygous
Ca21chr6_C_albicans_SC5314	286279	286362	SC5314	SV	INS	homozygous
Ca21chr6_C_albicans_SC5314	319465	319497	SC5314	SV	DEL	homozygous
Ca21chr6_C_albicans_SC5314	322853	322889	SC5314	SV	INS	heterozygous
Ca21chr6_C_albicans_SC5314	327879	327911	SC5314	SV	DEL	homozygous
Ca21chr6_C_albicans_SC5314	396328	396380	SC5314	SV	DEL	homozygous
Ca21chr6_C_albicans_SC5314	416500	416552	SC5314	SV	DEL	homozygous
Ca21chr6_C_albicans_SC5314	445176	445228	SC5314	SV	DEL	homozygous
Ca21chr6_C_albicans_SC5314	461003	461129	SC5314	SV	INS	homozygous
Ca21chr6_C_albicans_SC5314	477923	477981	SC5314	SV	DEL	heterozygous
Ca21chr6_C_albicans_SC5314	505457	505509	SC5314	SV	DEL	homozygous
Ca21chr6_C_albicans_SC5314	582201	582247	SC5314	SV	INS	heterozygous
Ca21chr6_C_albicans_SC5314	590322	590361	SC5314	SV	INS	homozygous
Ca21chr6_C_albicans_SC5314	700162	700478	SC5314	SV	INS	heterozygous
Ca21chr6_C_albicans_SC5314	720202	720251	SC5314	SV	DEL	homozygous
Ca21chr6_C_albicans_SC5314	752393	752870	SC5314	SV	INS	heterozygous
Ca21chr6_C_albicans_SC5314	775161	775205	SC5314	SV	INS	homozygous
Ca21chr6_C_albicans_SC5314	778527	778554	SC5314	SV	DEL	homozygous
Ca21chr6_C_albicans_SC5314	780457	781147	SC5314	SV	DEL	heterozygous
Ca21chr6_C_albicans_SC5314	780461	780466	SC5314	SV	BND	heterozygous
Ca21chr6_C_albicans_SC5314	780461	780466	SC5314	SV	BND	homozygous
Ca21chr6_C_albicans_SC5314	781143	781148	SC5314	SV	BND	homozygous
Ca21chr6_C_albicans_SC5314	781144	781149	SC5314	SV	BND	heterozygous
Ca21chr6_C_albicans_SC5314	784035	784141	SC5314	SV	INS	heterozygous
Ca21chr6_C_albicans_SC5314	792830	793692	SC5314	SV	INS	homozygous
Ca21chr6_C_albicans_SC5314	792962	793179	SC5314	SV	INS	homozygous
Ca21chr6_C_albicans_SC5314	793616	793940	SC5314	SV	INS	homozygous
Ca21chr6_C_albicans_SC5314	802485	802603	SC5314	SV	INS	heterozygous
Ca21chr6_C_albicans_SC5314	803804	803832	SC5314	SV	INS	homozygous
Ca21chr6_C_albicans_SC5314	874039	874430	SC5314	SV	DEL	heterozygous
Ca21chr6_C_albicans_SC5314	877196	877248	SC5314	SV	DEL	homozygous
Ca21chr6_C_albicans_SC5314	888654	889168	SC5314	SV	DEL	heterozygous
Ca21chr6_C_albicans_SC5314	892417	892456	SC5314	SV	INS	heterozygous
Ca21chr6_C_albicans_SC5314	896048	896100	SC5314	SV	DEL	homozygous
Ca21chr6_C_albicans_SC5314	900217	900434	SC5314	SV	DEL	heterozygous
Ca21chr6_C_albicans_SC5314	901473	902878	SC5314	SV	DEL	heterozygous
Ca21chr6_C_albicans_SC5314	901480	902560	SC5314	SV	DEL	homozygous
Ca21chr6_C_albicans_SC5314	911342	911374	SC5314	SV	DEL	heterozygous
Ca21chr6_C_albicans_SC5314	912523	912548	SC5314	SV	INS	homozygous
Ca21chr6_C_albicans_SC5314	913730	913782	SC5314	SV	DEL	homozygous
Ca21chr6_C_albicans_SC5314	917968	918001	SC5314	SV	INS	heterozygous
Ca21chr6_C_albicans_SC5314	920642	920701	SC5314	SV	INS	heterozygous
Ca21chr6_C_albicans_SC5314	922314	922411	SC5314	SV	INS	homozygous
Ca21chr6_C_albicans_SC5314	923559	923632	SC5314	SV	DEL	heterozygous
Ca21chr6_C_albicans_SC5314	924137	924623	SC5314	SV	INS	heterozygous
Ca21chr6_C_albicans_SC5314	924535	924574	SC5314	SV	INS	heterozygous
Ca21chr6_C_albicans_SC5314	924759	924809	SC5314	SV	DEL	homozygous
Ca21chr6_C_albicans_SC5314	972806	972914	SC5314	SV	INS	heterozygous
Ca21chr6_C_albicans_SC5314	974253	974901	SC5314	SV	DEL	homozygous
Ca21chr6_C_albicans_SC5314	975005	976518	SC5314	SV	DEL	heterozygous
Ca21chr6_C_albicans_SC5314	975031	975571	SC5314	SV	DEL	homozygous
Ca21chr6_C_albicans_SC5314	976688	977769	SC5314	SV	DEL	homozygous
Ca21chr6_C_albicans_SC5314	979789	979840	SC5314	SV	DEL	homozygous
Ca21chr6_C_albicans_SC5314	986616	987797	SC5314	SV	DEL	heterozygous
Ca21chr6_C_albicans_SC5314	987105	990496	SC5314	SV	INS	homozygous
Ca21chr6_C_albicans_SC5314	999389	999877	SC5314	SV	INS	heterozygous
Ca21chr7_C_albicans_SC5314	109672	109677	SC5314	SV	BND	homozygous
Ca21chr7_C_albicans_SC5314	111831	111836	SC5314	SV	BND	homozygous
Ca21chr7_C_albicans_SC5314	111835	111840	SC5314	SV	BND	homozygous
Ca21chr7_C_albicans_SC5314	234619	234729	SC5314	SV	INS	homozygous
Ca21chr7_C_albicans_SC5314	285764	285805	SC5314	SV	INS	homozygous
Ca21chr7_C_albicans_SC5314	366233	366273	SC5314	SV	DEL	homozygous
Ca21chr7_C_albicans_SC5314	379312	379355	SC5314	SV	INS	heterozygous
Ca21chr7_C_albicans_SC5314	400145	400181	SC5314	SV	INS	homozygous
Ca21chr7_C_albicans_SC5314	417851	417883	SC5314	SV	DEL	homozygous
Ca21chr7_C_albicans_SC5314	521430	528930	SC5314	SV	DEL	heterozygous
Ca21chr7_C_albicans_SC5314	541714	541777	SC5314	SV	INS	heterozygous
Ca21chr7_C_albicans_SC5314	553912	560339	SC5314	SV	DEL	heterozygous
Ca21chr7_C_albicans_SC5314	571873	571917	SC5314	SV	INS	heterozygous
Ca21chr7_C_albicans_SC5314	575466	575529	SC5314	SV	DEL	heterozygous
Ca21chr7_C_albicans_SC5314	582503	582676	SC5314	SV	DEL	homozygous
Ca21chr7_C_albicans_SC5314	589559	589613	SC5314	SV	INS	heterozygous
Ca21chr7_C_albicans_SC5314	601769	601945	SC5314	SV	DEL	heterozygous
Ca21chr7_C_albicans_SC5314	621715	621792	SC5314	SV	INS	homozygous
Ca21chr7_C_albicans_SC5314	639197	639673	SC5314	SV	INS	heterozygous
Ca21chr7_C_albicans_SC5314	700855	700914	SC5314	SV	INS	homozygous
Ca21chr7_C_albicans_SC5314	719721	720091	SC5314	SV	DEL	heterozygous
Ca21chr7_C_albicans_SC5314	722566	722631	SC5314	SV	INS	homozygous
Ca21chr7_C_albicans_SC5314	723767	724555	SC5314	SV	DEL	heterozygous
Ca21chr7_C_albicans_SC5314	756014	756228	SC5314	SV	DEL	heterozygous
Ca21chr7_C_albicans_SC5314	768690	768755	SC5314	SV	INS	homozygous
Ca21chr7_C_albicans_SC5314	779143	779617	SC5314	SV	DEL	heterozygous
Ca21chr7_C_albicans_SC5314	907534	907661	SC5314	SV	INS	homozygous
Ca21chr7_C_albicans_SC5314	943009	943014	SC5314	SV	BND	heterozygous
Ca21chr7_C_albicans_SC5314	945113	945495	SC5314	SV	DEL	heterozygous
Ca21chr7_C_albicans_SC5314	946014	946045	SC5314	SV	INS	heterozygous
Ca21chrR_C_albicans_SC5314	751	781	SC5314	SV	INS	heterozygous
Ca21chrR_C_albicans_SC5314	1455	1494	SC5314	SV	INS	heterozygous
Ca21chrR_C_albicans_SC5314	210586	210591	SC5314	SV	BND	heterozygous
Ca21chrR_C_albicans_SC5314	215731	215736	SC5314	SV	BND	heterozygous
Ca21chrR_C_albicans_SC5314	281591	281658	SC5314	SV	INS	homozygous
Ca21chrR_C_albicans_SC5314	306605	306642	SC5314	SV	DEL	heterozygous
Ca21chrR_C_albicans_SC5314	352789	352884	SC5314	SV	INS	homozygous
Ca21chrR_C_albicans_SC5314	438207	438319	SC5314	SV	INS	homozygous
Ca21chrR_C_albicans_SC5314	441626	441679	SC5314	SV	INS	heterozygous
Ca21chrR_C_albicans_SC5314	466408	466451	SC5314	SV	INS	homozygous
Ca21chrR_C_albicans_SC5314	477707	477992	SC5314	SV	INS	heterozygous
Ca21chrR_C_albicans_SC5314	498252	498538	SC5314	SV	INS	heterozygous
Ca21chrR_C_albicans_SC5314	510849	510882	SC5314	SV	DEL	heterozygous
Ca21chrR_C_albicans_SC5314	515830	516229	SC5314	SV	INS	heterozygous
Ca21chrR_C_albicans_SC5314	554094	554606	SC5314	SV	INS	heterozygous
Ca21chrR_C_albicans_SC5314	609946	610005	SC5314	SV	INS	heterozygous
Ca21chrR_C_albicans_SC5314	651677	651725	SC5314	SV	DEL	heterozygous
Ca21chrR_C_albicans_SC5314	675342	675379	SC5314	SV	DEL	heterozygous
Ca21chrR_C_albicans_SC5314	692539	693011	SC5314	SV	INS	heterozygous
Ca21chrR_C_albicans_SC5314	879240	879277	SC5314	SV	DEL	heterozygous
Ca21chrR_C_albicans_SC5314	882860	883146	SC5314	SV	INS	heterozygous
Ca21chrR_C_albicans_SC5314	894547	896698	SC5314	SV	INS	heterozygous
Ca21chrR_C_albicans_SC5314	894550	894555	SC5314	SV	BND	homozygous
Ca21chrR_C_albicans_SC5314	900964	901016	SC5314	SV	INS	homozygous
Ca21chrR_C_albicans_SC5314	917803	917838	SC5314	SV	INS	homozygous
Ca21chrR_C_albicans_SC5314	938886	938927	SC5314	SV	INS	homozygous
Ca21chrR_C_albicans_SC5314	958421	958896	SC5314	SV	INS	heterozygous
Ca21chrR_C_albicans_SC5314	961458	961852	SC5314	SV	DEL	homozygous
Ca21chrR_C_albicans_SC5314	993811	994203	SC5314	SV	INS	heterozygous
Ca21chrR_C_albicans_SC5314	1004014	1004063	SC5314	SV	INS	homozygous
Ca21chrR_C_albicans_SC5314	1049382	1049413	SC5314	SV	INS	homozygous
Ca21chrR_C_albicans_SC5314	1051314	1051386	SC5314	SV	INS	heterozygous
Ca21chrR_C_albicans_SC5314	1067568	1067607	SC5314	SV	DEL	heterozygous
Ca21chrR_C_albicans_SC5314	1071187	1071223	SC5314	SV	INS	heterozygous
Ca21chrR_C_albicans_SC5314	1097840	1098354	SC5314	SV	DEL	heterozygous
Ca21chrR_C_albicans_SC5314	1099068	1100050	SC5314	SV	INS	heterozygous
Ca21chrR_C_albicans_SC5314	1109276	1110062	SC5314	SV	DEL	heterozygous
Ca21chrR_C_albicans_SC5314	1127826	1127882	SC5314	SV	INS	homozygous
Ca21chrR_C_albicans_SC5314	1129044	1134798	SC5314	SV	DEL	heterozygous
Ca21chrR_C_albicans_SC5314	1129048	1129053	SC5314	SV	BND	heterozygous
Ca21chrR_C_albicans_SC5314	1134773	1134778	SC5314	SV	BND	heterozygous
Ca21chrR_C_albicans_SC5314	1143331	1143448	SC5314	SV	INS	homozygous
Ca21chrR_C_albicans_SC5314	1158901	1159028	SC5314	SV	DEL	heterozygous
Ca21chrR_C_albicans_SC5314	1161009	1161061	SC5314	SV	DEL	homozygous
Ca21chrR_C_albicans_SC5314	1225225	1225257	SC5314	SV	INS	homozygous
Ca21chrR_C_albicans_SC5314	1229730	1233515	SC5314	SV	INS	heterozygous
Ca21chrR_C_albicans_SC5314	1229736	1229741	SC5314	SV	BND	heterozygous
Ca21chrR_C_albicans_SC5314	1232247	1238951	SC5314	SV	INS	heterozygous
Ca21chrR_C_albicans_SC5314	1346141	1346173	SC5314	SV	DEL	homozygous
Ca21chrR_C_albicans_SC5314	1346412	1346514	SC5314	SV	INS	heterozygous
Ca21chrR_C_albicans_SC5314	1352755	1353100	SC5314	SV	DEL	heterozygous
Ca21chrR_C_albicans_SC5314	1359801	1360192	SC5314	SV	INS	heterozygous
Ca21chrR_C_albicans_SC5314	1396762	1396796	SC5314	SV	DEL	homozygous
Ca21chrR_C_albicans_SC5314	1406850	1406926	SC5314	SV	INS	heterozygous
Ca21chrR_C_albicans_SC5314	1412347	1412381	SC5314	SV	DEL	homozygous
Ca21chrR_C_albicans_SC5314	1423276	1423308	SC5314	SV	DEL	heterozygous
Ca21chrR_C_albicans_SC5314	1479833	1479909	SC5314	SV	DEL	heterozygous
Ca21chrR_C_albicans_SC5314	1487195	1487200	SC5314	SV	BND	heterozygous
Ca21chrR_C_albicans_SC5314	1487202	1493645	SC5314	SV	INS	heterozygous
Ca21chrR_C_albicans_SC5314	1487211	1487216	SC5314	SV	BND	heterozygous
Ca21chrR_C_albicans_SC5314	1533370	1533697	SC5314	SV	DEL	heterozygous
Ca21chrR_C_albicans_SC5314	1547987	1548051	SC5314	SV	INS	homozygous
Ca21chrR_C_albicans_SC5314	1585327	1585644	SC5314	SV	DEL	heterozygous
Ca21chrR_C_albicans_SC5314	1611180	1611717	SC5314	SV	DEL	heterozygous
Ca21chrR_C_albicans_SC5314	1647591	1647628	SC5314	SV	INS	heterozygous
Ca21chrR_C_albicans_SC5314	1711659	1711689	SC5314	SV	DEL	heterozygous
Ca21chrR_C_albicans_SC5314	1760123	1760514	SC5314	SV	INS	heterozygous
Ca21chrR_C_albicans_SC5314	1884332	1888374	SC5314	SV	DEL	homozygous
Ca21chrR_C_albicans_SC5314	1884759	1897572	SC5314	SV	DUP	homozygous
Ca21chrR_C_albicans_SC5314	1885075	1885431	SC5314	SV	INS	homozygous
Ca21chrR_C_albicans_SC5314	1885765	1885832	SC5314	SV	DEL	homozygous
Ca21chrR_C_albicans_SC5314	1886041	1886075	SC5314	SV	DEL	homozygous
Ca21chrR_C_albicans_SC5314	1886366	1886423	SC5314	SV	INS	homozygous
Ca21chrR_C_albicans_SC5314	1887278	1887323	SC5314	SV	DEL	homozygous
Ca21chrR_C_albicans_SC5314	1887636	1888378	SC5314	SV	DEL	homozygous
Ca21chrR_C_albicans_SC5314	1889019	1889039	SC5314	SV	DEL	homozygous
Ca21chrR_C_albicans_SC5314	1889310	1889372	SC5314	SV	DEL	homozygous
Ca21chrR_C_albicans_SC5314	1889552	1897790	SC5314	SV	DEL	homozygous
Ca21chrR_C_albicans_SC5314	1889743	1889796	SC5314	SV	DEL	homozygous
Ca21chrR_C_albicans_SC5314	1890348	1890381	SC5314	SV	DEL	homozygous
Ca21chrR_C_albicans_SC5314	1890793	1890837	SC5314	SV	DEL	homozygous
Ca21chrR_C_albicans_SC5314	1891105	1891157	SC5314	SV	DEL	homozygous
Ca21chrR_C_albicans_SC5314	1891297	1891356	SC5314	SV	DEL	homozygous
Ca21chrR_C_albicans_SC5314	1892333	1892369	SC5314	SV	DEL	homozygous
Ca21chrR_C_albicans_SC5314	1892560	1892623	SC5314	SV	INS	homozygous
Ca21chrR_C_albicans_SC5314	1892714	1892772	SC5314	SV	DEL	homozygous
Ca21chrR_C_albicans_SC5314	1892970	1893023	SC5314	SV	INS	homozygous
Ca21chrR_C_albicans_SC5314	1893368	1893457	SC5314	SV	DEL	homozygous
Ca21chrR_C_albicans_SC5314	1893721	1893810	SC5314	SV	DEL	homozygous
Ca21chrR_C_albicans_SC5314	1893886	1893945	SC5314	SV	DEL	homozygous
Ca21chrR_C_albicans_SC5314	1894209	1894247	SC5314	SV	DEL	homozygous
Ca21chrR_C_albicans_SC5314	1894574	1894613	SC5314	SV	DEL	homozygous
Ca21chrR_C_albicans_SC5314	1895052	1895091	SC5314	SV	DEL	homozygous
Ca21chrR_C_albicans_SC5314	1895479	1895521	SC5314	SV	DEL	homozygous
Ca21chrR_C_albicans_SC5314	1895664	1895704	SC5314	SV	DEL	homozygous
Ca21chrR_C_albicans_SC5314	1895988	1896032	SC5314	SV	DEL	homozygous
Ca21chrR_C_albicans_SC5314	1896130	1896194	SC5314	SV	INS	homozygous
Ca21chrR_C_albicans_SC5314	1896268	1896311	SC5314	SV	DEL	homozygous
Ca21chrR_C_albicans_SC5314	1896664	1896699	SC5314	SV	DEL	homozygous
Ca21chrR_C_albicans_SC5314	1896755	1896785	SC5314	SV	INS	homozygous
Ca21chrR_C_albicans_SC5314	1897646	1902151	SC5314	SV	INS	homozygous
Ca21chrR_C_albicans_SC5314	1932976	1932981	SC5314	SV	BND	homozygous
Ca21chrR_C_albicans_SC5314	1934775	1934780	SC5314	SV	BND	homozygous
Ca21chrR_C_albicans_SC5314	2027614	2027681	SC5314	SV	INS	homozygous
Ca21chrR_C_albicans_SC5314	2049502	2049587	SC5314	SV	INS	homozygous
Ca21chrR_C_albicans_SC5314	2052506	2052554	SC5314	SV	INS	homozygous
Ca21chrR_C_albicans_SC5314	2166036	2166090	SC5314	SV	INS	homozygous
Ca21chrR_C_albicans_SC5314	2220044	2220093	SC5314	SV	INS	homozygous
Ca21chrR_C_albicans_SC5314	1932977	1934777	L26	TE	TE	homozygous
Ca21chr4_C_albicans_SC5314	996050	997872	L26	TE	TE	homozygous
Ca21chr4_C_albicans_SC5314	1486954	1488776	L26	TE	TE	heterozygous
Ca21chr5_C_albicans_SC5314	515380	515996	L26	TE	TE	homozygous
Ca21chr5_C_albicans_SC5314	516524	516688	L26	TE	TE	homozygous
Ca21chrR_C_albicans_SC5314	4327	8717	L26	TE	TE	homozygous
Ca21chr6_C_albicans_SC5314	557161	557660	L26	TE	TE	NA
Ca21chr2_C_albicans_SC5314	1929502	1929982	L26	TE	TE	heterozygous
Ca21chr1_C_albicans_SC5314	804984	805430	L26	TE	TE	homozygous
Ca21chrR_C_albicans_SC5314	1109281	1110061	L26	TE	TE	homozygous
Ca21chr1_C_albicans_SC5314	3186463	3186549	L26	TE	TE	NA
Ca21chr2_C_albicans_SC5314	1012416	1012886	L26	TE	TE	heterozygous
Ca21chr7_C_albicans_SC5314	674456	674926	L26	TE	TE	heterozygous
Ca21chrR_C_albicans_SC5314	1968322	1968792	L26	TE	TE	heterozygous
Ca21chr6_C_albicans_SC5314	229436	230773	L26	TE	TE	homozygous
Ca21chr6_C_albicans_SC5314	280968	282736	L26	TE	TE	homozygous
Ca21chr6_C_albicans_SC5314	282763	283115	L26	TE	TE	homozygous
Ca21chr6_C_albicans_SC5314	282805	283995	L26	TE	TE	homozygous
Ca21chr6_C_albicans_SC5314	304662	306045	L26	TE	TE	homozygous
Ca21chr1_C_albicans_SC5314	3178400	3178782	L26	TE	TE	heterozygous
Ca21chr7_C_albicans_SC5314	942510	942891	L26	TE	TE	heterozygous
Ca21chr1_C_albicans_SC5314	403873	404261	L26	TE	TE	heterozygous
Ca21chr2_C_albicans_SC5314	1886925	1887313	L26	TE	TE	heterozygous
Ca21chr5_C_albicans_SC5314	192731	193013	L26	TE	TE	heterozygous
Ca21chrR_C_albicans_SC5314	2243682	2244072	L26	TE	TE	heterozygous
Ca21chr1_C_albicans_SC5314	222183	222653	L26	TE	TE	heterozygous
Ca21chr1_C_albicans_SC5314	1657274	1657720	L26	TE	TE	NA
Ca21chr1_C_albicans_SC5314	1657465	1657928	L26	TE	TE	NA
Ca21chr1_C_albicans_SC5314	1657958	1658143	L26	TE	TE	NA
Ca21chr1_C_albicans_SC5314	1658142	1658642	L26	TE	TE	NA
Ca21chr1_C_albicans_SC5314	1658647	1659127	L26	TE	TE	NA
Ca21chr1_C_albicans_SC5314	1659628	1659736	L26	TE	TE	NA
Ca21chr5_C_albicans_SC5314	360288	360759	L26	TE	TE	homozygous
Ca21chr5_C_albicans_SC5314	398346	398487	L26	TE	TE	heterozygous
Ca21chr7_C_albicans_SC5314	521437	521907	L26	TE	TE	heterozygous
Ca21chr7_C_albicans_SC5314	521622	524139	L26	TE	TE	heterozygous
Ca21chr7_C_albicans_SC5314	524917	525039	L26	TE	TE	heterozygous
Ca21chr7_C_albicans_SC5314	524993	526488	L26	TE	TE	heterozygous
Ca21chr7_C_albicans_SC5314	527437	528933	L26	TE	TE	heterozygous
Ca21chr7_C_albicans_SC5314	617117	617184	L26	TE	TE	heterozygous
Ca21chrR_C_albicans_SC5314	1924225	1924696	L26	TE	TE	homozygous
Ca21chrR_C_albicans_SC5314	2182312	2182783	L26	TE	TE	homozygous
Ca21chrR_C_albicans_SC5314	646503	647258	L26	TE	TE	homozygous
Ca21chr1_C_albicans_SC5314	1902460	1902967	L26	TE	TE	heterozygous
Ca21chr6_C_albicans_SC5314	240364	245424	L26	TE	TE	heterozygous
Ca21chr4_C_albicans_SC5314	1061000	1061517	L26	TE	TE	heterozygous
Ca21chrR_C_albicans_SC5314	1881479	1881738	L26	TE	TE	heterozygous
Ca21chr3_C_albicans_SC5314	1646961	1647492	L26	TE	TE	homozygous
Ca21chrR_C_albicans_SC5314	1611185	1611717	L26	TE	TE	heterozygous
Ca21chrR_C_albicans_SC5314	2103387	2103932	L26	TE	TE	homozygous
Ca21chr2_C_albicans_SC5314	332979	334143	L26	TE	TE	homozygous
Ca21chr3_C_albicans_SC5314	1585263	1587210	L26	TE	TE	homozygous
Ca21chr7_C_albicans_SC5314	553920	559420	L26	TE	TE	heterozygous
Ca21chr7_C_albicans_SC5314	557420	560341	L26	TE	TE	heterozygous
Ca21chr2_C_albicans_SC5314	1665234	1669783	L26	TE	TE	heterozygous
Ca21chr6_C_albicans_SC5314	986620	987109	L26	TE	TE	homozygous
Ca21chr6_C_albicans_SC5314	987211	987796	L26	TE	TE	homozygous
Ca21chr4_C_albicans_SC5314	673951	680847	L26	TE	TE	heterozygous
Ca21chr6_C_albicans_SC5314	780460	781144	L26	TE	TE	heterozygous
Ca21chr1_C_albicans_SC5314	912991	913031	L26	TE	TE	heterozygous
Ca21chr1_C_albicans_SC5314	1291214	1291702	L26	TE	TE	NA
Ca21chr1_C_albicans_SC5314	2325210	2325554	L26	TE	TE	heterozygous
Ca21chr1_C_albicans_SC5314	2337087	2337233	L26	TE	TE	heterozygous
Ca21chr3_C_albicans_SC5314	822259	822930	L26	TE	TE	homozygous
Ca21chr4_C_albicans_SC5314	637136	637644	L26	TE	TE	heterozygous
Ca21chr6_C_albicans_SC5314	325509	326022	L26	TE	TE	homozygous
Ca21chr6_C_albicans_SC5314	871326	871776	L26	TE	TE	heterozygous
Ca21chrR_C_albicans_SC5314	547757	547851	L26	TE	TE	heterozygous
Ca21chrR_C_albicans_SC5314	625686	626195	L26	TE	TE	homozygous
Ca21chrR_C_albicans_SC5314	1097845	1098373	L26	TE	TE	homozygous
Ca21chrR_C_albicans_SC5314	1971125	1971633	L26	TE	TE	homozygous
Ca21chr1_C_albicans_SC5314	42185	43680	L26	TE	TE	heterozygous
Ca21chr1_C_albicans_SC5314	3186563	3186641	L26	TE	TE	NA
Ca21chr2_C_albicans_SC5314	654944	655414	L26	TE	TE	homozygous
Ca21chr5_C_albicans_SC5314	500709	501180	L26	TE	TE	heterozygous
Ca21chr5_C_albicans_SC5314	543840	543908	L26	TE	TE	heterozygous
Ca21chr7_C_albicans_SC5314	779128	779616	L26	TE	TE	heterozygous
Ca21chrR_C_albicans_SC5314	210585	215731	L26	TE	TE	heterozygous
Ca21chrR_C_albicans_SC5314	1474281	1474751	L26	TE	TE	heterozygous
Ca21chr2_C_albicans_SC5314	734880	735247	L26	TE	TE	heterozygous
Ca21chrR_C_albicans_SC5314	646303	646620	L26	TE	TE	NA
Ca21chrR_C_albicans_SC5314	1998845	1999232	L26	TE	TE	heterozygous
Ca21chr1_C_albicans_SC5314	2337262	2337370	L26	TE	TE	heterozygous
Ca21chr1_C_albicans_SC5314	2590791	2591299	L26	TE	TE	heterozygous
Ca21chr6_C_albicans_SC5314	888659	889167	L26	TE	TE	heterozygous
Ca21chr2_C_albicans_SC5314	0	195	L26	TE	TE	NA
Ca21chr1_C_albicans_SC5314	3181869	3186094	L26	TE	TE	homozygous
Ca21chr3_C_albicans_SC5314	15458	15638	L26	TE	TE	heterozygous
Ca21chrR_C_albicans_SC5314	116260	116547	L26	TE	TE	homozygous
Ca21chrR_C_albicans_SC5314	116546	116769	L26	TE	TE	homozygous
Ca21chrR_C_albicans_SC5314	116768	118219	L26	TE	TE	homozygous
Ca21chrR_C_albicans_SC5314	1129033	1134760	L26	TE	TE	heterozygous
Ca21chr4_C_albicans_SC5314	996050	997872	P75063	TE	TE	heterozygous
Ca21chr4_C_albicans_SC5314	1486954	1488776	P75063	TE	TE	homozygous
Ca21chr5_C_albicans_SC5314	515380	515996	P75063	TE	TE	homozygous
Ca21chr5_C_albicans_SC5314	516524	516688	P75063	TE	TE	homozygous
Ca21chrR_C_albicans_SC5314	4327	8717	P75063	TE	TE	homozygous
Ca21chr6_C_albicans_SC5314	557161	557660	P75063	TE	TE	heterozygous
Ca21chr2_C_albicans_SC5314	1929502	1929982	P75063	TE	TE	heterozygous
Ca21chr4_C_albicans_SC5314	585848	586328	P75063	TE	TE	heterozygous
Ca21chr7_C_albicans_SC5314	617176	617390	P75063	TE	TE	heterozygous
Ca21chr7_C_albicans_SC5314	624271	624320	P75063	TE	TE	heterozygous
Ca21chr1_C_albicans_SC5314	804984	805430	P75063	TE	TE	homozygous
Ca21chr7_C_albicans_SC5314	835137	835917	P75063	TE	TE	heterozygous
Ca21chrR_C_albicans_SC5314	1109281	1110061	P75063	TE	TE	heterozygous
Ca21chr2_C_albicans_SC5314	5310	5396	P75063	TE	TE	NA
Ca21chr2_C_albicans_SC5314	1012416	1012886	P75063	TE	TE	heterozygous
Ca21chr7_C_albicans_SC5314	674456	674926	P75063	TE	TE	heterozygous
Ca21chrR_C_albicans_SC5314	1968322	1968792	P75063	TE	TE	heterozygous
Ca21chr6_C_albicans_SC5314	229436	230773	P75063	TE	TE	homozygous
Ca21chr6_C_albicans_SC5314	280968	282736	P75063	TE	TE	homozygous
Ca21chr6_C_albicans_SC5314	282763	283115	P75063	TE	TE	homozygous
Ca21chr6_C_albicans_SC5314	282805	283995	P75063	TE	TE	homozygous
Ca21chr6_C_albicans_SC5314	304662	306045	P75063	TE	TE	homozygous
Ca21chr1_C_albicans_SC5314	3178400	3178782	P75063	TE	TE	NA
Ca21chr2_C_albicans_SC5314	1886925	1887313	P75063	TE	TE	heterozygous
Ca21chr1_C_albicans_SC5314	222183	222653	P75063	TE	TE	homozygous
Ca21chr1_C_albicans_SC5314	1657274	1657720	P75063	TE	TE	heterozygous
Ca21chr1_C_albicans_SC5314	1657465	1657928	P75063	TE	TE	heterozygous
Ca21chr1_C_albicans_SC5314	1657958	1658143	P75063	TE	TE	heterozygous
Ca21chr1_C_albicans_SC5314	1658142	1658642	P75063	TE	TE	heterozygous
Ca21chr1_C_albicans_SC5314	1658647	1659127	P75063	TE	TE	heterozygous
Ca21chr1_C_albicans_SC5314	1659628	1659736	P75063	TE	TE	heterozygous
Ca21chr5_C_albicans_SC5314	360288	360759	P75063	TE	TE	heterozygous
Ca21chr5_C_albicans_SC5314	398346	398487	P75063	TE	TE	heterozygous
Ca21chr7_C_albicans_SC5314	521437	521907	P75063	TE	TE	heterozygous
Ca21chr7_C_albicans_SC5314	521622	524139	P75063	TE	TE	heterozygous
Ca21chr7_C_albicans_SC5314	524917	525039	P75063	TE	TE	heterozygous
Ca21chr7_C_albicans_SC5314	524993	526488	P75063	TE	TE	heterozygous
Ca21chr7_C_albicans_SC5314	527437	528933	P75063	TE	TE	heterozygous
Ca21chr7_C_albicans_SC5314	617117	617184	P75063	TE	TE	heterozygous
Ca21chrR_C_albicans_SC5314	262513	262593	P75063	TE	TE	heterozygous
Ca21chrR_C_albicans_SC5314	1924225	1924696	P75063	TE	TE	NA
Ca21chrR_C_albicans_SC5314	2182312	2182783	P75063	TE	TE	heterozygous
Ca21chrR_C_albicans_SC5314	646503	647258	P75063	TE	TE	homozygous
Ca21chr1_C_albicans_SC5314	1902460	1902967	P75063	TE	TE	NA
Ca21chr6_C_albicans_SC5314	240364	245424	P75063	TE	TE	NA
Ca21chr4_C_albicans_SC5314	1061000	1061517	P75063	TE	TE	heterozygous
Ca21chrR_C_albicans_SC5314	1881479	1881738	P75063	TE	TE	heterozygous
Ca21chr3_C_albicans_SC5314	1646961	1647492	P75063	TE	TE	heterozygous
Ca21chrR_C_albicans_SC5314	1611185	1611717	P75063	TE	TE	NA
Ca21chrR_C_albicans_SC5314	2103387	2103932	P75063	TE	TE	homozygous
Ca21chr2_C_albicans_SC5314	332979	334143	P75063	TE	TE	homozygous
Ca21chr3_C_albicans_SC5314	1585263	1587210	P75063	TE	TE	homozygous
Ca21chr1_C_albicans_SC5314	277088	277401	P75063	TE	TE	NA
Ca21chr7_C_albicans_SC5314	553920	559420	P75063	TE	TE	heterozygous
Ca21chr7_C_albicans_SC5314	557420	560341	P75063	TE	TE	heterozygous
Ca21chr6_C_albicans_SC5314	780460	781144	P75063	TE	TE	heterozygous
Ca21chr1_C_albicans_SC5314	1291214	1291702	P75063	TE	TE	heterozygous
Ca21chr3_C_albicans_SC5314	822259	822930	P75063	TE	TE	homozygous
Ca21chr4_C_albicans_SC5314	637136	637644	P75063	TE	TE	heterozygous
Ca21chr6_C_albicans_SC5314	325509	326022	P75063	TE	TE	homozygous
Ca21chrR_C_albicans_SC5314	625686	626195	P75063	TE	TE	heterozygous
Ca21chrR_C_albicans_SC5314	1097845	1098373	P75063	TE	TE	heterozygous
Ca21chrR_C_albicans_SC5314	1971125	1971633	P75063	TE	TE	homozygous
Ca21chr1_C_albicans_SC5314	42185	43680	P75063	TE	TE	heterozygous
Ca21chr2_C_albicans_SC5314	5223	5297	P75063	TE	TE	NA
Ca21chr2_C_albicans_SC5314	654944	655414	P75063	TE	TE	heterozygous
Ca21chr5_C_albicans_SC5314	500709	501180	P75063	TE	TE	heterozygous
Ca21chr6_C_albicans_SC5314	636949	637390	P75063	TE	TE	heterozygous
Ca21chrR_C_albicans_SC5314	1474281	1474751	P75063	TE	TE	heterozygous
Ca21chrR_C_albicans_SC5314	420346	420725	P75063	TE	TE	NA
Ca21chrR_C_albicans_SC5314	1998845	1999232	P75063	TE	TE	heterozygous
Ca21chr1_C_albicans_SC5314	2590791	2591299	P75063	TE	TE	NA
Ca21chr4_C_albicans_SC5314	1178669	1179178	P75063	TE	TE	heterozygous
Ca21chr6_C_albicans_SC5314	888659	889167	P75063	TE	TE	heterozygous
Ca21chr2_C_albicans_SC5314	0	195	P75063	TE	TE	NA
Ca21chr1_C_albicans_SC5314	3181869	3186094	P75063	TE	TE	homozygous
Ca21chrR_C_albicans_SC5314	116260	116547	P75063	TE	TE	homozygous
Ca21chrR_C_albicans_SC5314	116546	116769	P75063	TE	TE	homozygous
Ca21chrR_C_albicans_SC5314	116768	118219	P75063	TE	TE	homozygous
Ca21chrR_C_albicans_SC5314	1129033	1134760	P75063	TE	TE	heterozygous
Ca21chrR_C_albicans_SC5314	961463	961851	SC5314	TE	TE	heterozygous
Ca21chrR_C_albicans_SC5314	1932977	1934777	SC5314	TE	TE	homozygous
Ca21chr4_C_albicans_SC5314	996050	997872	SC5314	TE	TE	homozygous
Ca21chr4_C_albicans_SC5314	1486954	1488776	SC5314	TE	TE	homozygous
Ca21chr5_C_albicans_SC5314	515380	515996	SC5314	TE	TE	homozygous
Ca21chr5_C_albicans_SC5314	516524	516688	SC5314	TE	TE	homozygous
Ca21chrR_C_albicans_SC5314	4327	8717	SC5314	TE	TE	homozygous
Ca21chr6_C_albicans_SC5314	557161	557660	SC5314	TE	TE	NA
Ca21chr2_C_albicans_SC5314	1929502	1929982	SC5314	TE	TE	heterozygous
Ca21chr4_C_albicans_SC5314	585848	586328	SC5314	TE	TE	heterozygous
Ca21chr1_C_albicans_SC5314	804984	805430	SC5314	TE	TE	heterozygous
Ca21chr7_C_albicans_SC5314	835137	835917	SC5314	TE	TE	homozygous
Ca21chrR_C_albicans_SC5314	1109281	1110061	SC5314	TE	TE	heterozygous
Ca21chr2_C_albicans_SC5314	1012416	1012886	SC5314	TE	TE	heterozygous
Ca21chr7_C_albicans_SC5314	674456	674926	SC5314	TE	TE	heterozygous
Ca21chrR_C_albicans_SC5314	1968322	1968792	SC5314	TE	TE	heterozygous
Ca21chr6_C_albicans_SC5314	229436	230773	SC5314	TE	TE	homozygous
Ca21chr6_C_albicans_SC5314	280968	282736	SC5314	TE	TE	homozygous
Ca21chr6_C_albicans_SC5314	282763	283115	SC5314	TE	TE	homozygous
Ca21chr6_C_albicans_SC5314	282805	283995	SC5314	TE	TE	homozygous
Ca21chr6_C_albicans_SC5314	304662	306045	SC5314	TE	TE	homozygous
Ca21chr1_C_albicans_SC5314	3178400	3178782	SC5314	TE	TE	heterozygous
Ca21chr7_C_albicans_SC5314	942510	942891	SC5314	TE	TE	heterozygous
Ca21chr1_C_albicans_SC5314	403873	404261	SC5314	TE	TE	heterozygous
Ca21chr2_C_albicans_SC5314	1886925	1887313	SC5314	TE	TE	heterozygous
Ca21chr5_C_albicans_SC5314	192731	193013	SC5314	TE	TE	heterozygous
Ca21chrR_C_albicans_SC5314	2243682	2244072	SC5314	TE	TE	heterozygous
Ca21chr1_C_albicans_SC5314	222183	222653	SC5314	TE	TE	homozygous
Ca21chr1_C_albicans_SC5314	1657274	1657720	SC5314	TE	TE	NA
Ca21chr1_C_albicans_SC5314	1657465	1657928	SC5314	TE	TE	NA
Ca21chr1_C_albicans_SC5314	1657958	1658143	SC5314	TE	TE	NA
Ca21chr1_C_albicans_SC5314	1658142	1658642	SC5314	TE	TE	NA
Ca21chr1_C_albicans_SC5314	1658647	1659127	SC5314	TE	TE	NA
Ca21chr1_C_albicans_SC5314	1659628	1659736	SC5314	TE	TE	NA
Ca21chr5_C_albicans_SC5314	360288	360759	SC5314	TE	TE	heterozygous
Ca21chr5_C_albicans_SC5314	398346	398487	SC5314	TE	TE	heterozygous
Ca21chr7_C_albicans_SC5314	521437	521907	SC5314	TE	TE	heterozygous
Ca21chr7_C_albicans_SC5314	521622	524139	SC5314	TE	TE	heterozygous
Ca21chr7_C_albicans_SC5314	524917	525039	SC5314	TE	TE	heterozygous
Ca21chr7_C_albicans_SC5314	524993	526488	SC5314	TE	TE	heterozygous
Ca21chr7_C_albicans_SC5314	527437	528933	SC5314	TE	TE	heterozygous
Ca21chr7_C_albicans_SC5314	617117	617184	SC5314	TE	TE	heterozygous
Ca21chrR_C_albicans_SC5314	1924225	1924696	SC5314	TE	TE	homozygous
Ca21chrR_C_albicans_SC5314	2182312	2182783	SC5314	TE	TE	homozygous
Ca21chrR_C_albicans_SC5314	646503	647258	SC5314	TE	TE	homozygous
Ca21chr1_C_albicans_SC5314	1902460	1902967	SC5314	TE	TE	heterozygous
Ca21chr6_C_albicans_SC5314	240364	245424	SC5314	TE	TE	heterozygous
Ca21chr4_C_albicans_SC5314	1061000	1061517	SC5314	TE	TE	heterozygous
Ca21chr3_C_albicans_SC5314	1646961	1647492	SC5314	TE	TE	homozygous
Ca21chrR_C_albicans_SC5314	1611185	1611717	SC5314	TE	TE	heterozygous
Ca21chrR_C_albicans_SC5314	2103387	2103932	SC5314	TE	TE	homozygous
Ca21chr2_C_albicans_SC5314	332979	334143	SC5314	TE	TE	homozygous
Ca21chr3_C_albicans_SC5314	1585263	1587210	SC5314	TE	TE	homozygous
Ca21chr1_C_albicans_SC5314	3187234	3187534	SC5314	TE	TE	NA
Ca21chr1_C_albicans_SC5314	3187523	3187869	SC5314	TE	TE	heterozygous
Ca21chr1_C_albicans_SC5314	3187869	3188548	SC5314	TE	TE	homozygous
Ca21chr7_C_albicans_SC5314	553920	559420	SC5314	TE	TE	homozygous
Ca21chr7_C_albicans_SC5314	557420	560341	SC5314	TE	TE	homozygous
Ca21chr2_C_albicans_SC5314	1665234	1669783	SC5314	TE	TE	heterozygous
Ca21chr6_C_albicans_SC5314	986620	987109	SC5314	TE	TE	heterozygous
Ca21chr6_C_albicans_SC5314	987211	987796	SC5314	TE	TE	heterozygous
Ca21chr4_C_albicans_SC5314	673951	680847	SC5314	TE	TE	heterozygous
Ca21chr6_C_albicans_SC5314	780460	781144	SC5314	TE	TE	heterozygous
Ca21chr1_C_albicans_SC5314	1021319	1021599	SC5314	TE	TE	NA
Ca21chr1_C_albicans_SC5314	912991	913031	SC5314	TE	TE	heterozygous
Ca21chr1_C_albicans_SC5314	1291214	1291702	SC5314	TE	TE	NA
Ca21chr1_C_albicans_SC5314	2325210	2325554	SC5314	TE	TE	heterozygous
Ca21chr1_C_albicans_SC5314	2337087	2337233	SC5314	TE	TE	heterozygous
Ca21chr3_C_albicans_SC5314	822259	822930	SC5314	TE	TE	homozygous
Ca21chr4_C_albicans_SC5314	637136	637644	SC5314	TE	TE	heterozygous
Ca21chr4_C_albicans_SC5314	1197760	1198197	SC5314	TE	TE	heterozygous
Ca21chr6_C_albicans_SC5314	325509	326022	SC5314	TE	TE	homozygous
Ca21chr6_C_albicans_SC5314	871326	871776	SC5314	TE	TE	heterozygous
Ca21chrR_C_albicans_SC5314	547757	547851	SC5314	TE	TE	NA
Ca21chrR_C_albicans_SC5314	625686	626195	SC5314	TE	TE	homozygous
Ca21chrR_C_albicans_SC5314	1097845	1098373	SC5314	TE	TE	heterozygous
Ca21chrR_C_albicans_SC5314	1971125	1971633	SC5314	TE	TE	homozygous
Ca21chr1_C_albicans_SC5314	43780	46166	SC5314	TE	TE	heterozygous
Ca21chr1_C_albicans_SC5314	42185	43680	SC5314	TE	TE	heterozygous
Ca21chr2_C_albicans_SC5314	654944	655414	SC5314	TE	TE	homozygous
Ca21chr5_C_albicans_SC5314	500709	501180	SC5314	TE	TE	heterozygous
Ca21chr5_C_albicans_SC5314	543840	543908	SC5314	TE	TE	heterozygous
Ca21chr7_C_albicans_SC5314	779128	779616	SC5314	TE	TE	heterozygous
Ca21chrR_C_albicans_SC5314	210585	215731	SC5314	TE	TE	homozygous
Ca21chrR_C_albicans_SC5314	1474281	1474751	SC5314	TE	TE	heterozygous
Ca21chr2_C_albicans_SC5314	734880	735247	SC5314	TE	TE	heterozygous
Ca21chrR_C_albicans_SC5314	646303	646620	SC5314	TE	TE	NA
Ca21chrR_C_albicans_SC5314	1998845	1999232	SC5314	TE	TE	heterozygous
Ca21chr1_C_albicans_SC5314	2337262	2337370	SC5314	TE	TE	heterozygous
Ca21chr1_C_albicans_SC5314	2590791	2591299	SC5314	TE	TE	heterozygous
Ca21chr4_C_albicans_SC5314	1178669	1179178	SC5314	TE	TE	heterozygous
Ca21chr6_C_albicans_SC5314	888659	889167	SC5314	TE	TE	heterozygous
Ca21chr2_C_albicans_SC5314	0	195	SC5314	TE	TE	heterozygous
Ca21chr1_C_albicans_SC5314	3181869	3186094	SC5314	TE	TE	homozygous
Ca21chrR_C_albicans_SC5314	116260	116547	SC5314	TE	TE	homozygous
Ca21chrR_C_albicans_SC5314	116546	116769	SC5314	TE	TE	homozygous
Ca21chrR_C_albicans_SC5314	116768	118219	SC5314	TE	TE	homozygous
Ca21chrR_C_albicans_SC5314	1090777	1090838	SC5314	TE	TE	heterozygous
Ca21chrR_C_albicans_SC5314	1129033	1134760	SC5314	TE	TE	heterozygous
Ca21chr1_C_albicans_SC5314	84911	84915	L26	TE	TE	heterozygous
Ca21chr1_C_albicans_SC5314	296448	296448	L26	TE	TE	NA
Ca21chr1_C_albicans_SC5314	460234	460239	L26	TE	TE	heterozygous
Ca21chr1_C_albicans_SC5314	811820	811824	L26	TE	TE	heterozygous
Ca21chr1_C_albicans_SC5314	878313	878318	L26	TE	TE	heterozygous
Ca21chr1_C_albicans_SC5314	918070	918075	L26	TE	TE	heterozygous
Ca21chr1_C_albicans_SC5314	1581073	1581082	L26	TE	TE	heterozygous
Ca21chr1_C_albicans_SC5314	1705024	1705029	L26	TE	TE	heterozygous
Ca21chr1_C_albicans_SC5314	1886706	1886710	L26	TE	TE	heterozygous
Ca21chr1_C_albicans_SC5314	1985653	1985658	L26	TE	TE	heterozygous
Ca21chr1_C_albicans_SC5314	2073998	2074003	L26	TE	TE	heterozygous
Ca21chr1_C_albicans_SC5314	2099351	2099357	L26	TE	TE	heterozygous
Ca21chr1_C_albicans_SC5314	2146802	2146805	L26	TE	TE	heterozygous
Ca21chr1_C_albicans_SC5314	2164393	2164397	L26	TE	TE	heterozygous
Ca21chr1_C_albicans_SC5314	2341464	2341469	L26	TE	TE	heterozygous
Ca21chr1_C_albicans_SC5314	2557782	2557787	L26	TE	TE	heterozygous
Ca21chr1_C_albicans_SC5314	2610634	2610639	L26	TE	TE	heterozygous
Ca21chr1_C_albicans_SC5314	2718528	2718533	L26	TE	TE	heterozygous
Ca21chr1_C_albicans_SC5314	2924663	2924675	L26	TE	TE	heterozygous
Ca21chr1_C_albicans_SC5314	2984302	2984308	L26	TE	TE	heterozygous
Ca21chr2_C_albicans_SC5314	42063	42068	L26	TE	TE	heterozygous
Ca21chr2_C_albicans_SC5314	70591	70602	L26	TE	TE	heterozygous
Ca21chr2_C_albicans_SC5314	430986	430988	L26	TE	TE	heterozygous
Ca21chr2_C_albicans_SC5314	520885	520898	L26	TE	TE	heterozygous
Ca21chr2_C_albicans_SC5314	663079	663084	L26	TE	TE	heterozygous
Ca21chr2_C_albicans_SC5314	679454	679463	L26	TE	TE	heterozygous
Ca21chr2_C_albicans_SC5314	712199	712204	L26	TE	TE	homozygous
Ca21chr2_C_albicans_SC5314	738585	738589	L26	TE	TE	heterozygous
Ca21chr2_C_albicans_SC5314	771801	771802	L26	TE	TE	heterozygous
Ca21chr2_C_albicans_SC5314	837394	837401	L26	TE	TE	heterozygous
Ca21chr2_C_albicans_SC5314	922504	922509	L26	TE	TE	heterozygous
Ca21chr2_C_albicans_SC5314	1026370	1026389	L26	TE	TE	heterozygous
Ca21chr2_C_albicans_SC5314	1189097	1189101	L26	TE	TE	heterozygous
Ca21chr2_C_albicans_SC5314	1348656	1348662	L26	TE	TE	heterozygous
Ca21chr2_C_albicans_SC5314	1369011	1369014	L26	TE	TE	heterozygous
Ca21chr2_C_albicans_SC5314	1557581	1557588	L26	TE	TE	heterozygous
Ca21chr2_C_albicans_SC5314	1675858	1675863	L26	TE	TE	heterozygous
Ca21chr2_C_albicans_SC5314	1915435	1915450	L26	TE	TE	heterozygous
Ca21chr3_C_albicans_SC5314	27355	27376	L26	TE	TE	heterozygous
Ca21chr3_C_albicans_SC5314	234570	234570	L26	TE	TE	heterozygous
Ca21chr3_C_albicans_SC5314	378828	378844	L26	TE	TE	heterozygous
Ca21chr3_C_albicans_SC5314	528996	529001	L26	TE	TE	heterozygous
[truncated: 235 more rows]
